# Supplementary material for: d-Camphor-derived triazolium salts for catalytic intramolecular crossed aldehyde–ketone benzoin reactions
Source: Royal Society of Chemistry journal article supplement (doi:10.1039/b801004h), 2008-01-01

*Supporting Information for*

**D-Camphor-derived Triazolium Salts for Catalytic Intramolecular  
Crossed Aldehyde-Ketone Benzoin Reactions**

Yi Li, Zhen Feng and Shu-Li You\*

State Key Laboratory of Organometallic Chemistry

Shanghai Institute of Organic Chemistry, Chinese Academy of Sciences

354 Fenglin Lu, Shanghai 200032 (P. R. China)

Fax: (+86) 21-54925087

E-mail: [slyou@mail.sioc.ac.cn](mailto:slyou@mail.sioc.ac.cn)

## General Methods.

All reactions utilizing air- or moisture-sensitive reagents were carried out in flame-dried glassware under a dry Ar atmosphere. All solvents were purified and dried according to standard methods prior to use.

$^1\text{H}$  NMR spectra were recorded on a VARIAN Mercury 300 MHz spectrometer in chloroform- $\text{d}_3$ . Chemical shifts are reported in ppm with the internal TMS signal at 0.0 ppm as a standard. The data is being reported as (s = singlet, d = doublet, t = triplet, m = multiplet or unresolved, brs = broad singlet, coupling constant(s) in Hz, integration).  $^{13}\text{C}$  NMR spectra were recorded on a VARIAN Mercury 75 MHz spectrometer in chloroform- $\text{d}_3$ . Chemical shifts are reported in ppm with the internal chloroform signal at 77.0 ppm as a standard.  $^{19}\text{F}$  NMR spectra were recorded on a VARIAN Mercury 282 MHz spectrometer. Chemical shifts are reported in ppm with  $\text{CCl}_3\text{F}$  signal at 0.00 ppm as an external standard.

Optical rotation ( $[\alpha]_{\text{D}}$ ) were measured on a Perkin-Elmer 785A UV/VIS Detector polarimeter. Enantiomeric excesses were assessed by HPLC analysis on a chiral stationary phase, CHIRALPAK AD-H or CHIRALCEL OD-H or CHIRALPAK AS-H (Daicel Chemical Ind., Ltd.,  $\Phi$  0.46mm  $\times$  25 cm).

Keto-aldehydes **5j**<sup>[1]</sup> and **5l**<sup>[2]</sup> were synthesized according to the literature.

### Preparation<sup>[3]</sup> of the lactam **4**.

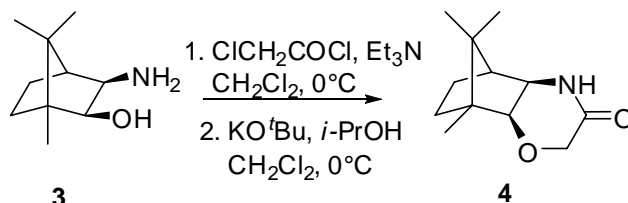

To a solution of **3**<sup>[4]</sup> (6.0 g, 36.4 mmol) and triethylamine (11.2 mL, 80 mmol) in  $\text{CH}_2\text{Cl}_2$  (200 mL) at  $0^\circ\text{C}$  was slowly added chloroacetyl chloride (3.2 mL, 40 mmol) over 20 min. The mixture was allowed to warm to ambient temperature and stirred for about 6 h. The solution was then cooled to  $0^\circ\text{C}$  and potassium *tert*-butoxide (13.1 g, 153 mmol) in 2-propanol (100 mL) was added dropwise over 30 min. The mixture was allowed to warm to ambient temperature and stirred for about 2 d. After completion (monitored by TLC), the solvent was removed under reduced pressure. Water (50 mL) was added to the residue, and the mixture was extracted with ethyl acetate (50 mL  $\times$  3). The combined ethyl acetate extract was washed with brine, dried over anhydrous  $\text{Na}_2\text{SO}_4$  and then concentrated under reduced pressure. The crude product was purified by flash column chromatography to afford the title compound **4** as a white solid (3.6 g, yield 66%):  $R_f$  (1:1 petro-ether to ethyl acetate) = 0.3;  $[\alpha]_D^{20} = +97.1^\circ$  ( $c = 1.00$ ,  $\text{CHCl}_3$ ). **<sup>1</sup>H NMR** (300 MHz,  $\text{CDCl}_3$ )  $\delta$  0.85 (s, 3 H), 1.00 (s, 3 H), 1.08 (m, 1 H), 1.13 (s, 3 H), 1.53-1.74 (m, 4 H), 3.37 (d,  $J = 6.6$  Hz, 1 H), 3.66 (d,  $J = 6.9$  Hz, 1 H), 3.77 (d,  $J = 15.3$  Hz, 1 H), 4.12 (d,  $J = 15$  Hz, 1 H), 6.38 (brs, 1 H); **<sup>13</sup>C NMR** (75 MHz,  $\text{CDCl}_3$ )  $\delta$  10.9, 20.3, 21.8, 25.7, 32.7, 47.2, 48.9, 50.0, 57.9, 65.8, 83.4, 171.1; **IR** (KBr):  $\nu_{\text{max}}$  ( $\text{cm}^{-1}$ ) = 3178, 3066, 2955, 2873, 1688, 1429, 1353, 1114, 830, 807, 446; **MS** (EI,  $m/z$ , rel. intensity) 209 ( $M^+$ , 19), 95 (100); **HRMS** (EI) calcd for  $\text{C}_{12}\text{H}_{19}\text{NO}_2$  ( $M^+$ ): 209.1416; Found: 209.1423.

## Preparation<sup>[5]</sup> of triazolium salts **1**.

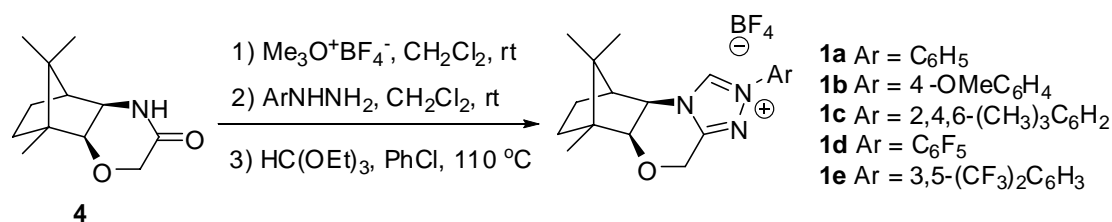

A flamed-dried 50 mL round bottom flask was charged with lactam **4** (0.50 g, 2.4 mmol) and  $\text{CH}_2\text{Cl}_2$  (15 mL). Trimethyloxonium tetrafluoroborate (0.43 g, 2.9 mmol) was added and the mixture was stirred for about 1 d at rt. The corresponding aryl hydrazine (2.4 mmol) was added and stirred for another 1 d. The solvent was evaporated and chlorobenzene (25 mL) was added, followed by triethyl orthoformate (2.5 mL / day, 15 mmol). The mixture was then heated to  $110\text{ }^\circ\text{C}$  and stirred at this temperature for about 3 d. After completion (monitored by NMR), the solvent was removed under reduced pressure. The crude product was purified by flash column chromatography and further purified by recrystallization in hexane/ethyl acetate. All the yields indicated below refer to those obtained after recrystallization.

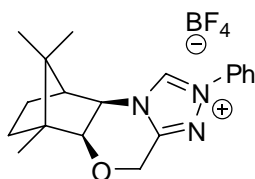

**1a**: white solid, yield 35%.  $[\alpha]_{\text{D}}^{20} = +29.4^\circ$  ( $c = 1.00$ ,  $\text{CHCl}_3$ ).  **$^1\text{H}$  NMR** (300 MHz,  $\text{CDCl}_3$ )  $\delta$  0.66 (s, 3 H), 0.86 (s, 3 H), 1.00 (s, 3 H), 1.19-1.28 (m, 2 H), 1.55-1.59 (m, 1 H), 1.79-1.82 (m, 1 H), 2.65 (d,  $J = 4.8$  Hz, 1 H), 4.07 (d,  $J = 7.2$  Hz, 1 H), 4.46 (d,  $J = 6.9$  Hz, 1 H), 4.72 (d,  $J = 15.3$  Hz, 1 H), 5.03 (d,  $J = 15$  Hz, 1 H), 7.46-7.53 (m, 3 H), 7.85-7.88 (m, 2 H), 10.26 (s, 1 H);  **$^{13}\text{C}$  NMR** (75 MHz,  $\text{CDCl}_3$ )  $\delta$  11.0, 20.2, 21.2, 25.4, 32.4, 48.2, 49.6, 50.0, 58.7, 60.8, 83.8, 120.5, 130.1, 130.6, 134.9, 139.0, 151.2; **IR** (KBr):  $\nu_{\text{max}}$  ( $\text{cm}^{-1}$ ) = 3104, 2879, 1594, 1394, 1227, 1104, 1063, 975, 805,

764, 688, 521; **MS** (ESI,  $m/z$ , rel. intensity) 310.2 (M-BF<sub>4</sub>); **HRMS** (ESI) calcd for C<sub>19</sub>H<sub>24</sub>N<sub>3</sub>O (M-BF<sub>4</sub>): 310.1914; Found: 310.1914.

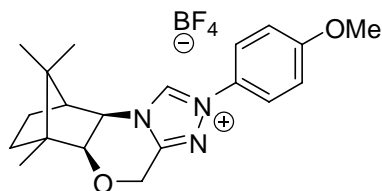

**1b**: pale yellow solid, yield 30%.  $[\alpha]_D^{20} = +31.7^\circ$  ( $c = 1.00$ , CHCl<sub>3</sub>). **<sup>1</sup>H NMR** (300 MHz, CDCl<sub>3</sub>)  $\delta$  0.67 (s, 3 H), 0.87 (s, 3 H), 1.01 (s, 3 H), 1.25-1.29 (m, 2 H), 1.61-1.68 (m, 1 H), 1.80-1.90 (m, 1 H), 2.64 (d,  $J = 4.8$  Hz, 1 H), 3.83 (s, 3 H), 4.08 (d,  $J = 6.9$  Hz, 1 H), 4.44 (d,  $J = 6.9$  Hz, 1 H), 4.70 (d,  $J = 15.3$  Hz, 1 H), 5.03 (d,  $J = 15.3$  Hz, 1 H), 6.94 (d,  $J = 9.0$  Hz, 2 H), 7.77 (d,  $J = 9.3$  Hz, 2 H), 10.13 (s, 1 H); **<sup>13</sup>C NMR** (75 MHz, CDCl<sub>3</sub>)  $\delta$  11.0, 20.2, 21.2, 25.4, 32.4, 48.2, 49.6, 49.9, 55.7, 58.7, 60.7, 83.8, 115.0, 122.2, 128.0, 138.2, 151.0, 161.1; **IR** (KBr):  $\nu_{\max}$  (cm<sup>-1</sup>) = 3154, 2947, 1590, 1514, 1459, 1261, 1110, 1062, 977, 827, 522; **MS** (ESI,  $m/z$ , rel. intensity) 340.2 (M-BF<sub>4</sub>); **HRMS** (ESI) calcd for C<sub>20</sub>H<sub>26</sub>N<sub>3</sub>O<sub>2</sub> (M-BF<sub>4</sub>): 340.2020; Found: 340.2014.

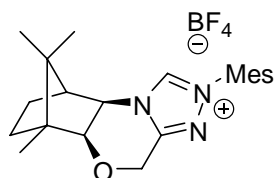

**1c**: colorless crystalline, yield 25%.  $[\alpha]_D^{20} = +6.6^\circ$  ( $c = 1.00$ , CHCl<sub>3</sub>). **<sup>1</sup>H NMR** (300 MHz, CDCl<sub>3</sub>)  $\delta$  0.67 (s, 3 H), 0.88 (s, 3 H), 1.02 (s, 3 H), 1.22-1.25 (m, 2 H), 1.58-1.66 (m, 1 H), 1.82-1.85 (m, 1 H), 2.01 (s, 6 H), 2.37 (s, 3 H), 2.65 (d,  $J = 4.2$  Hz, 1 H), 4.12 (d,  $J = 6.9$  Hz, 1 H), 4.55 (d,  $J = 7.2$  Hz, 1 H), 4.74 (d,  $J = 15.0$  Hz, 1 H), 5.02 (d,  $J = 15.0$  Hz, 1 H), 7.00 (s, 2 H), 9.80 (s, 1 H); **<sup>13</sup>C NMR** (75 MHz, CDCl<sub>3</sub>)  $\delta$  11.1, 17.0, 20.1, 21.1, 21.2, 25.3, 32.6, 48.2, 49.6, 50.0, 58.7, 60.7, 84.0, 129.6, 131.1, 141.8, 143.1, 151.1; **IR** (KBr):  $\nu_{\max}$  (cm<sup>-1</sup>) = 3141, 2951, 2927, 1589,

1458, 1222, 1105, 1060, 976, 805, 647, 522; **MS** (ESI,  $m/z$ , rel. intensity) 352.2 (M-BF<sub>4</sub>); **HRMS** (ESI) calcd for C<sub>22</sub>H<sub>30</sub>N<sub>3</sub>O (M-BF<sub>4</sub>): 352.2383; Found: 352.2400.

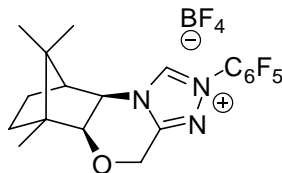

**1d**: white solid, yield 35%.  $[\alpha]_D^{20} = +29.0^\circ$  ( $c = 1.00$ , CHCl<sub>3</sub>). **<sup>1</sup>H NMR** (300 MHz, CDCl<sub>3</sub>)  $\delta$  0.64 (s, 3 H), 0.91 (s, 3 H), 1.03 (s, 3 H), 1.24-1.39 (m, 2 H), 1.67-1.71 (m, 1 H), 1.93-1.97 (m, 1 H), 2.46 (d,  $J = 4.2$  Hz, 1 H), 4.14 (d,  $J = 6.6$  Hz, 1 H), 4.55 (d,  $J = 6.9$  Hz, 1 H), 4.75 (d,  $J = 15.0$  Hz, 1 H), 5.05 (d,  $J = 15.0$  Hz, 1 H), 10.14 (s, 1 H); **<sup>13</sup>C NMR** (75 MHz, CDCl<sub>3</sub>)  $\delta$  10.9, 19.8, 21.0, 25.1, 32.4, 48.4, 49.5, 50.1, 58.5, 60.9, 83.8, 110.7, 136.2, 139.0, 141.7, 142.2, 145.3, 152.2; **IR** (KBr):  $\nu_{\max}$  (cm<sup>-1</sup>) = 3134, 2967, 1608, 1531, 1517, 1394, 1215, 1076, 1004, 987, 852, 800, 628, 524, 462; **MS** (ESI,  $m/z$ , rel. intensity) 400.2 (M-BF<sub>4</sub>); **HRMS** (ESI) calcd for C<sub>19</sub>H<sub>19</sub>N<sub>3</sub>O (M-BF<sub>4</sub>): 400.1443; Found: 400.1436.

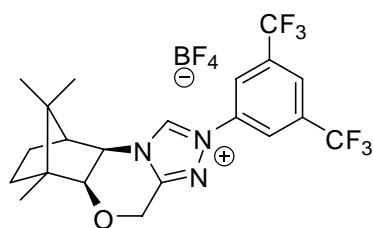

**1e**: white solid. yield 25%. **<sup>1</sup>H NMR** (300 MHz, CDCl<sub>3</sub>)  $\delta$  0.66 (s, 3 H), 0.85 (s, 3 H), 1.02 (s, 3 H), 1.17-1.27 (m, 2 H), 1.58-1.60 (m, 1 H), 1.79-1.83 (m, 1 H), 2.64 (d,  $J = 4.5$  Hz, 1 H), 4.11 (d,  $J = 6.9$  Hz, 1 H), 4.53 (d,  $J = 6.9$  Hz, 1 H), 4.77 (d,  $J = 15.0$  Hz, 1 H), 5.10 (d,  $J = 15.3$  Hz, 1 H), 7.95 (s, 1 H), 8.44 (s, 2 H), 10.47 (s, 1 H); **<sup>19</sup>F NMR** (282 MHz, CDCl<sub>3</sub>):  $\delta$  -63.3, -151.5, -151.6. **<sup>13</sup>C NMR** (75 MHz, CDCl<sub>3</sub>)  $\delta$  11.0, 20.3, 21.0, 25.4, 29.7, 32.3, 48.3, 49.6, 49.9, 58.7, 61.2, 83.8, 120.3, 121.2, 124.0 (m), 133.8 (q,  $J = 34.8$  Hz), 136.0, 140.5, 160.0; **IR** (KBr):  $\nu_{\max}$  (cm<sup>-1</sup>) = 3134, 2967, 1608, 1531, 1517, 1394, 1215, 1076, 1004, 987, 852, 800, 628, 524, 462; **MS** (ESI,  $m/z$ , rel.

intensity) 446.2 (M-BF<sub>4</sub>); **HRMS** (ESI) calcd for C<sub>21</sub>H<sub>22</sub>N<sub>3</sub>OF<sub>6</sub> (M-BF<sub>4</sub>): 446.1672; Found: 446.1662.

### General procedure for the preparation of keto-aldehydes (**5a-i**, **5k**)

The preparation of keto-aldehyde **5a** is representative.

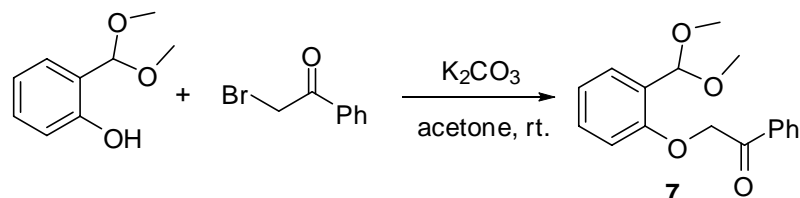

To a solution of the acetal<sup>[6]</sup> (1.1 g, 6 mmol) in acetone (5 mL) was added K<sub>2</sub>CO<sub>3</sub> (0.7 g, 5 mmol). After stirring for 0.5 h, ω-bromoacetophenone (1 g, 5 mmol) was added and the mixture was stirred at room temperature overnight. After completion (monitored by TLC), water was added to the solution, and the mixture was extracted with ethyl acetate. The combined ethyl acetate extract was washed with brine, dried over anhydrous Na<sub>2</sub>SO<sub>4</sub> and then concentrated under reduced pressure. The crude product was purified by flash column chromatography (hexane/EtOAc = 10/1).

**7**: yellow solid, yield 70%. <sup>1</sup>H NMR (300 MHz, CDCl<sub>3</sub>) δ 3.38 (s, 6 H), 5.31 (s, 2 H), 5.77 (s, 1 H), 6.82 (d, *J* = 8.4 Hz, 1 H), 7.02 (t, *J* = 7.5 Hz, 1 H), 7.26 (dd, *J* = 1.8, 15.6 Hz, 1 H), 7.47-7.62 (m, 4 H), 8.00 (d, *J* = 8.4 Hz, 2 H).

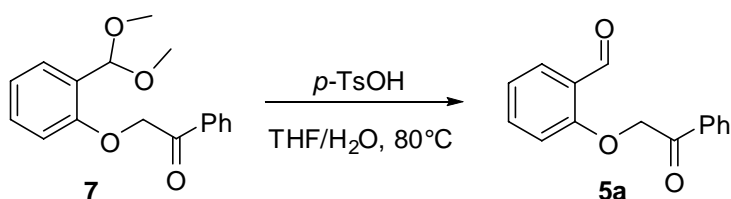

To a solution of **7** (0.27 g, 1 mmol) in THF (4 mL) /H<sub>2</sub>O (1 mL) was added *p*-TsOH (0.028 g, 0.1 mmol), and the solution was heated at 80°C for 2h. After completion (monitored by TLC), the mixture was cooled to room temperature and extracted with CH<sub>2</sub>Cl<sub>2</sub>. The combined organic layers were washed successively with saturated NaHCO<sub>3</sub>, brine, dried over anhydrous Na<sub>2</sub>SO<sub>4</sub> and then concentrated under reduced pressure. This material was suitable for the next reaction. The compound could be further purified by recrystallization in hexane/ethyl acetate.

**5a**<sup>[7]</sup> (entry 1, Table 2): white solid, yield 100%. **<sup>1</sup>H NMR** (300 MHz, CDCl<sub>3</sub>)  $\delta$  5.44 (s, 2 H), 6.86 (d,  $J$  = 8.1 Hz, 1 H), 7.07 (t,  $J$  = 7.8 Hz, 1 H), 7.48-7.55 (m, 3 H), 7.66 (t,  $J$  = 7.5 Hz, 1 H), 7.89 (dd,  $J$  = 1.5, 7.8 Hz, 1 H), 8.01 (d,  $J$  = 7.8 Hz, 2 H), 10.59 (s, 1 H).

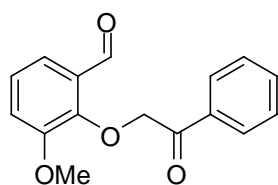

**5b**<sup>[8]</sup> (entry 2, Table 2): white solid, yield 40%, 2 steps. **<sup>1</sup>H NMR** (300 MHz, CDCl<sub>3</sub>)  $\delta$  3.86 (s, 3 H), 5.52 (s, 2 H), 7.14 (d,  $J$  = 4.8 Hz, 1 H), 7.46 (m, 3 H), 7.60 (m, 1 H), 7.92 (d,  $J$  = 7.2 Hz, 2 H), 10.66 (s, 1 H); **<sup>13</sup>C NMR** (75 MHz, CDCl<sub>3</sub>)  $\delta$  56.1, 74.8, 118.0, 119.3, 124.2, 127.7, 128.8, 129.7, 133.7, 134.4, 150.4, 151.8, 190.6, 194.4.

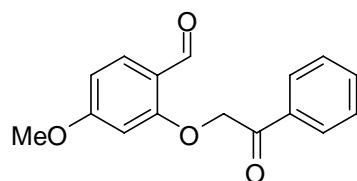

**5c** (entry 3, Table 2): white solid, yield 77%, 2 steps. **<sup>1</sup>H NMR** (300 MHz, CDCl<sub>3</sub>)  $\delta$  3.80 (s, 3 H), 5.37 (s, 2 H), 6.32 (s, 1 H), 6.56 (d,  $J$  = 8.7 Hz, 1 H), 7.49 (t,  $J$  = 7.5 Hz, 2 H), 7.62 (t,  $J$  = 7.5 Hz, 1 H), 7.83 (d,  $J$  = 8.7 Hz, 1 H), 7.97 (d,  $J$  = 7.5 Hz, 2 H), 10.38 (s, 1 H); **<sup>13</sup>C NMR** (75 MHz, CDCl<sub>3</sub>)  $\delta$  55.6, 70.7, 99.2, 106.5, 119.3, 128.0, 128.9, 130.7, 134.0, 134.1, 161.9, 165.9, 188.1, 193.4; **IR** (KBr):  $\nu_{\text{max}}$  (cm<sup>-1</sup>) = 3064, 2910, 1705, 1668, 1601, 1401, 1263, 1211, 1107, 1066, 983, 838, 765, 690, 660, 583, 449; **MS** (EI,  $m/z$ , rel. intensity) 270 ( $M^+$ , 2), 151 (100); **HRMS** (EI) calcd for C<sub>16</sub>H<sub>14</sub>O<sub>4</sub> ( $M^+$ ): 270.0892; Found: 270.0888.

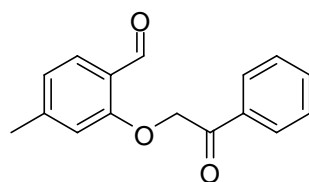

**5d** (entry 4, Table 2): yellow solid, yield 40%, 2 steps. **<sup>1</sup>H NMR** (300 MHz, CDCl<sub>3</sub>) δ 2.33 (s, 3 H), 5.40 (s, 2 H), 6.65 (s, 1 H), 6.85 (d, *J* = 7.8 Hz, 1 H), 7.50 (t, *J* = 7.5 Hz, 2 H), 7.63 (t, *J* = 7.5 Hz, 1 H), 7.74 (d, *J* = 7.8 Hz, 1 H), 7.97 (d, *J* = 7.8 Hz, 1 H), 10.49 (s, 1 H); **<sup>13</sup>C NMR** (75 MHz, CDCl<sub>3</sub>) δ 22.2, 70.7, 113.2, 122.6, 123.0, 128.0, 128.5, 128.9, 134.1, 147.3, 160.3, 189.2, 193.5; **IR** (KBr):  $\nu_{\max}$  (cm<sup>-1</sup>) = 3059, 2909, 1707, 1681, 1608, 1403, 1259, 1211, 981, 813, 761, 687, 666, 591, 453; **MS** (EI, *m/z*, rel. intensity) 254 (M<sup>+</sup>, 1), 105 (100); **HRMS** (EI) calcd for C<sub>16</sub>H<sub>14</sub>O<sub>3</sub> (M<sup>+</sup>): 254.0943; Found: 254.0946.

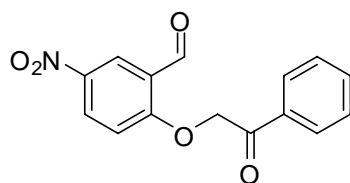

**5e** (entry 5, Table 2): yellow solid, yield 70%, 2 steps. **<sup>1</sup>H NMR** (300 MHz, DMSO-d<sub>6</sub>) δ 6.06 (s, 2 H), 7.47 (dd, *J* = 2.4, 7.8 Hz, 1 H), 7.60 (t, *J* = 7.5 Hz, 2 H), 7.73 (t, *J* = 7.5 Hz, 1 H), 8.04 (d, *J* = 7.2 Hz, 2 H), 8.44 (dd, *J* = 2.4, 7.8 Hz, 2 H), 10.46 (s, 1 H); **<sup>13</sup>C NMR** (75 MHz, DMSO-d<sub>6</sub>) δ 72.4, 116.2, 124.1, 124.7, 128.7, 129.6, 131.3, 134.5, 134.9, 141.8, 165.3, 188.6, 193.8; **IR** (KBr):  $\nu_{\max}$  (cm<sup>-1</sup>) = 3114, 2885, 1917, 1702, 1688, 1611, 1586, 1430, 1341, 1285, 1228, 1081, 975, 763, 679, 559; **MS** (EI, *m/z*, rel. intensity) 267 (M<sup>+</sup>-H<sub>2</sub>O, 12), 105 (100); **Anal.** calcd for C<sub>15</sub>H<sub>11</sub>NO<sub>5</sub>: C, 63.16; H, 3.89, N, 4.91; Found: C, 62.98; H, 3.95, N, 4.83.

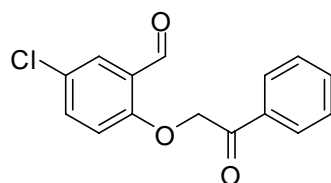

**5f** (entry 6, Table 2): yellow solid, yield 94%, 2 steps. **<sup>1</sup>H NMR** (300 MHz, CDCl<sub>3</sub>) δ 5.47 (s, 2 H), 6.81 (d, *J* = 8.7 Hz, 1 H), 7.42 (d, *J* = 8.7 Hz, 1 H), 7.52 (t, *J* = 7.5 Hz, 2 H), 7.66 (t, *J* = 7.2 Hz, 1 H), 7.79 (s, 1 H), 7.97 (d, *J* = 7.5 Hz, 2 H), 10.51 (s, 1 H); **<sup>13</sup>C NMR** (75 MHz, CDCl<sub>3</sub>) δ 70.8, 114.4, 126.0, 127.2, 127.8, 128.0, 129.0, 133.8, 134.3, 135.1, 158.7, 188.2, 192.9; **IR** (KBr):  $\nu_{\max}$  (cm<sup>-1</sup>) = 1708, 1677, 1598, 1401,

1277, 1230, 1186, 973, 815, 755, 685, 584, 552; **MS** (EI,  $m/z$ , rel. intensity) 274 ( $M^+$ , 1), 105 (100); **Anal.** calcd for  $C_{15}H_{11}ClO_3$ : C, 65.58; H, 4.04; Found: C, 65.49; H, 4.27.

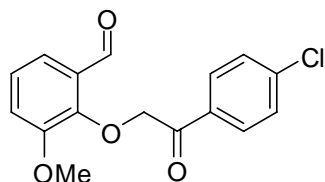

**5g** (entry 7, Table 2): white solid, yield 71%, 2 steps.  **$^1H$  NMR** (300 MHz,  $CDCl_3$ )  $\delta$  3.84 (s, 3 H), 5.46 (s, 2 H), 7.12 (d,  $J = 3.9$  Hz, 2 H), 7.42 (m, 1 H), 7.43 (d,  $J = 8.4$  Hz, 2 H), 7.87 (d,  $J = 8.4$  Hz, 2 H), 10.62 (s, 1 H);  **$^{13}C$  NMR** (75 MHz,  $CDCl_3$ )  $\delta$  56.0, 74.7, 117.9, 119.2, 124.2, 129.0, 129.1, 129.5, 132.6, 140.0, 150.1, 151.7, 190.4, 193.3; **IR** (KBr):  $\nu_{max}$  ( $cm^{-1}$ ) = 2928, 1705, 1685, 1587, 1481, 1396, 1259, 1204, 1091, 1064, 965, 915, 777, 745, 653, 579, 535; **MS** (EI,  $m/z$ , rel. intensity) 304 ( $M^+$ , 3), 139 (100); **Anal.** calcd for  $C_{16}H_{13}ClO_4$ : C, 63.06; H, 4.30; Found: C, 62.82; H, 4.54.

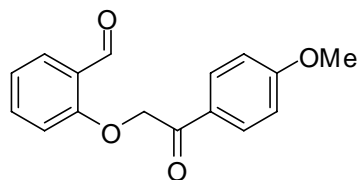

**5h** (entry 8, Table 2): white solid, yield 45%, 2 steps.  **$^1H$  NMR** (300 MHz,  $CDCl_3$ )  $\delta$  3.89 (s, 3 H), 5.38 (s, 2 H), 6.86 (d,  $J = 8.7$  Hz, 1 H), 6.98 (m, 2 H), 7.06 (t,  $J = 3.6$  Hz, 1 H), 7.49 (td,  $J = 1.8, 7.8$  Hz, 1 H), 7.86 (dd,  $J = 1.8, 7.8$  Hz, 1 H), 7.98 (d,  $J = 8.4$  Hz, 2 H), 10.58 (s, 1 H);  **$^{13}C$  NMR** (75 MHz,  $CDCl_3$ )  $\delta$  55.5, 70.6, 112.7, 114.1, 121.5, 125.2, 127.1, 128.5, 130.4, 135.7, 160.4, 164.2, 189.6, 192.0; **IR** (KBr):  $\nu_{max}$  ( $cm^{-1}$ ) = 2960, 2867, 1683, 1599, 1305, 1225, 1174, 975, 834, 757, 651, 589, 499, 441; **MS** (EI,  $m/z$ , rel. intensity) 270 ( $M^+$ , 1), 135 (100); **HRMS** (EI) calcd for  $C_{16}H_{14}O_4$  ( $M^+$ ): 270.0892; Found: 270.0885.

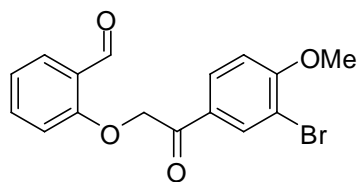

**5i**<sup>[11]</sup> (entry 9, Table 2): pale reddish powder, yield 65%, 2 steps. **<sup>1</sup>H NMR** (300 MHz, acetone-*d*<sub>6</sub>)  $\delta$  4.02 (s, 3 H), 5.75 (s, 2 H), 7.10 (t, *J* = 7.2 Hz, 1 H), 7.25 (q, *J* = 8.7 Hz, 2 H), 7.60 (td, *J* = 1.8, 8.1 Hz, 1 H), 7.77 (dd, *J* = 1.8, 7.5 Hz, 1 H), 8.12 (dd, *J* = 2.1, 9.0 Hz, 1 H), 8.26 (d, *J* = 2.1 Hz, 1 H), 10.62 (s, 1 H); **<sup>13</sup>C NMR** (75 MHz, DMSO-*d*<sub>6</sub>)  $\delta$  56.8, 70.5, 111.0, 112.5, 114.1, 121.1, 124.4, 127.5, 128.1, 129.6, 132.7, 136.2, 159.6, 160.4, 189.2, 191.7; **IR** (KBr):  $\nu_{\text{max}}$  (cm<sup>-1</sup>) = 2974, 2867, 1702, 1665, 1594, 1481, 1406, 1300, 1257, 1205, 992, 763, 680, 578, 443; **MS** (EI, *m/z*, rel. intensity) 348 (M<sup>+</sup>, 1), 215 (100); **HRMS** (EI) calcd for C<sub>16</sub>H<sub>11</sub>BrO<sub>3</sub> (M<sup>+</sup>-H<sub>2</sub>O): 329.9897; Found: 329.9892.

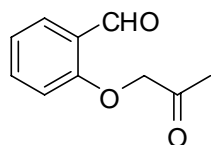

**5j**<sup>[11]</sup> (entry 10, Table 2): pale yellow crystalline. **<sup>1</sup>H NMR** (300 MHz, CDCl<sub>3</sub>)  $\delta$  2.34 (s, 3 H), 4.68 (s, 2 H), 6.81 (d, *J* = 8.7 Hz, 1 H), 7.11 (t, *J* = 7.5 Hz, 1 H), 7.55 (dt, *J* = 1.8, 7.8 Hz, 1 H), 7.88 (dd, *J* = 1.8, 7.8 Hz, 1 H), 10.58 (s, 1 H).

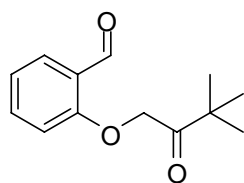

**5k** (entry 11, Table 2): white solid, yield 80%, 2 steps. **<sup>1</sup>H NMR** (300 MHz, CDCl<sub>3</sub>)  $\delta$  1.26 (s, 9 H), 5.03 (s, 2 H), 6.72 (d, *J* = 8.7 Hz, 1 H), 7.05 (t, *J* = 7.5 Hz, 1 H), 7.49 (dt, *J* = 1.8, 8.1 Hz, 1 H), 7.85 (dd, *J* = 1.8, 7.8 Hz, 1 H), 10.57 (s, 1 H); **<sup>13</sup>C NMR** (75 MHz, CDCl<sub>3</sub>)  $\delta$  26.2, 43.1, 68.8, 112.4, 121.4, 125.2, 128.5, 135.6, 160.3, 189.6, 208.6; **IR** (KBr):  $\nu_{\text{max}}$  (cm<sup>-1</sup>) = 2981, 2870, 1716, 1684, 1598, 1481, 1233, 989, 757,

648, 503; **MS** (EI,  $m/z$ , rel. intensity) 220 ( $M^+$ , 1), 57 (100); **HRMS** (EI) calcd for  $C_{13}H_{16}O_3$  ( $M^+$ ): 220.1099; Found: 220.1095.

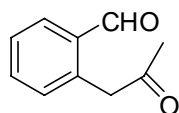

**5l**<sup>[2]</sup>: pale yellow oil. **<sup>1</sup>H NMR** (300 MHz,  $CDCl_3$ )  $\delta$  2.33 (s, 3 H), 4.14 (s, 2 H), 7.21 (d,  $J$  = 6.6 Hz, 1 H), 7.48-7.59 (m, 2 H), 7.82 (dd,  $J$  = 1.8, 6.9 Hz, 1 H), 10.01 (s, 1 H).

## General Procedure for Intramolecular Crossed Aldehyde-Ketone Benzoin Reactions

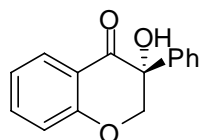

The reaction of keto-aldehyde **5a** is representative (entry 1, Table 2). A flame dried Schlenk tube was cooled to room temperature and filled with argon. To this flask were added triazolium salt **1d** (3.2 mg, 0.006 mmol, 6 mol %), DBU (0.76  $\mu$ L, 0.005 mmol, 5 mol %), THF (1 mL). The mixture was stirred for 0.5 h at room temperature, keto-aldehyde **5a** (26 mg, 0.1 mmol) was added. After the reaction was complete (monitored by TLC), the reaction was cooled to 0°C, and water was added. The product was extracted with CH<sub>2</sub>Cl<sub>2</sub> (5 mL  $\times$  3). The combined organic layers were dried over anhydrous Na<sub>2</sub>SO<sub>4</sub>, concentrated under reduced pressure, and then purified by silica-gel column chromatography (hexane/EtOAc = 10/1) to afford benzoin product **6a** as a white solid.

**6a**<sup>[7]</sup> (entry 1, Table 2): white solid, 93% yield, 84% ee [Daicel Chiralpak AD-H, hexanes/2-propanol = 90/10,  $v$  = 1.0 mL/min<sup>-1</sup>,  $\lambda$  = 230 nm,  $t$  (minor) = 13.64 min,  $t$  (major) = 16.65 min]. <sup>1</sup>H NMR (300 MHz, CDCl<sub>3</sub>)  $\delta$  4.23 (s, 1 H), 4.47 (d,  $J$  = 11.1 Hz, 1 H), 4.85 (d,  $J$  = 11.7 Hz, 1 H), 6.96 (d,  $J$  = 8.1 Hz, 1H), 7.07 (t,  $J$  = 7.5 Hz, 1 H), 7.03-7.36 (m, 3 H), 7.44-7.54 (m, 3 H), 7.93 (dd,  $J$  = 1.5, 8.1 Hz, 1 H).

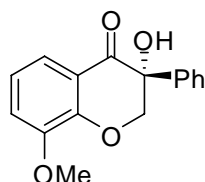

**6b** (entry 2, Table 2): white solid, 96% yield, 76% ee [Daicel Chiralcel OD-H, hexanes/2-propanol = 75/25,  $v$  = 0.5 mL  $\cdot$  min<sup>-1</sup>,  $\lambda$  = 230 nm,  $t$  (major) = 16.77 min,  $t$  (minor) = 19.95 min];  $[\alpha]_D^{20}$  = +41.7° ( $c$  = 1.45, CHCl<sub>3</sub>). <sup>1</sup>H NMR (300 MHz, CDCl<sub>3</sub>)  $\delta$  3.85 (s, 3 H), 4.30 (s, 1 H), 4.48 (d,  $J$  = 11.7 Hz, 1 H), 4.99 (d,  $J$  = 11.7 Hz, 1 H), 6.95-7.05 (m, 2 H), 7.26-7.33 (m, 3 H), 7.45-7.53 (m, 3 H); <sup>13</sup>C NMR (75 MHz,

CDCl<sub>3</sub>)  $\delta$  56.1, 73.2, 74.0, 117.2, 118.5, 119.7, 121.6, 126.0, 128.6, 128.7, 138.1, 148.6, 151.3, 194.5; **IR** (KBr):  $\nu_{\max}$  (cm<sup>-1</sup>) = 3398, 3002, 2872, 1679, 1489, 1440, 1272, 11443, 1028, 973, 767, 694, 636, 558, 470; **MS** (EI,  $m/z$ , rel. intensity) 270 (M<sup>+</sup>, 12), 151 (100); **Anal.** calcd for C<sub>16</sub>H<sub>14</sub>O<sub>4</sub>: C, 71.10; H, 5.22; Found: C, 70.83; H, 5.43.

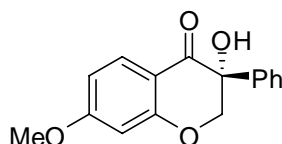

**6c**<sup>[9]</sup> (entry 3, Table 2): white solid, 99% yield, 87% ee [Daicel Chiralcel OD-H, hexanes/2-propanol = 90/10,  $\nu$  = 0.5 mL · min<sup>-1</sup>,  $\lambda$  = 230 nm,  $t$  (major) = 25.88 min,  $t$  (minor) = 28.79 min];  $[\alpha]_D^{20}$  = -7.0° ( $c$  = 1.35, CHCl<sub>3</sub>). **<sup>1</sup>H NMR** (300 MHz, CDCl<sub>3</sub>)  $\delta$  3.82 (s, 3 H), 4.26 (s, 1 H), 4.46 (d,  $J$  = 11.4 Hz, 1 H), 4.81 (d,  $J$  = 11.7 Hz, 1 H), 6.39 (d,  $J$  = 2.1 Hz, 1 H), 6.62 (dd,  $J$  = 2.1, 8.7 Hz, 1 H), 7.30-7.35 (m, 3 H), 7.45-7.48 (m, 2 H), 7.86 (d,  $J$  = 8.7 Hz, 1 H); **<sup>13</sup>C NMR** (75 MHz, CDCl<sub>3</sub>)  $\delta$  55.7, 72.9, 74.2, 100.8, 110.9, 112.8, 125.9, 128.6, 129.3, 139.0, 163.7, 166.8, 192.9.

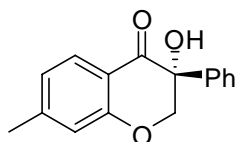

**6d** (entry 4, Table 2): white solid, 92% yield, 78% ee [Daicel Chiralcel OD-H, hexanes/2-propanol = 98/2,  $\nu$  = 0.8 mL · min<sup>-1</sup>,  $\lambda$  = 230 nm,  $t$  (major) = 21.15 min,  $t$  (minor) = 24.13 min];  $[\alpha]_D^{20}$  = +28.5° ( $c$  = 1.20, CHCl<sub>3</sub>). **<sup>1</sup>H NMR** (300 MHz, CDCl<sub>3</sub>)  $\delta$  2.35 (s, 3 H), 4.26 (s, 1 H), 4.45 (d,  $J$  = 11.4 Hz, 1 H), 4.82 (d,  $J$  = 11.4 Hz, 1 H), 6.77 (s, 1 H), 6.88 (d,  $J$  = 7.8 Hz, 1 H), 7.29-7.33 (m, 3 H), 7.45-7.48 (m, 2 H), 7.82 (d,  $J$  = 8.4 Hz, 1 H); **<sup>13</sup>C NMR** (75 MHz, CDCl<sub>3</sub>)  $\delta$  22.0, 73.2, 73.8, 116.8, 118.0, 123.4, 126.0, 127.4, 128.6, 128.7, 138.7, 148.6, 161.6, 194.1; **IR** (KBr):  $\nu_{\max}$  (cm<sup>-1</sup>) = 3396, 3057, 2879, 1678, 1619, 1450, 1349, 1261, 1263, 1100, 1041, 950, 757, 699, 643, 551, 495; **MS** (EI,  $m/z$ , rel. intensity) 254 (M<sup>+</sup>, 2), 135 (100); **Anal.** calcd for C<sub>16</sub>H<sub>14</sub>O<sub>3</sub>: C, 75.57; H, 5.55; Found: C, 75.59; H, 5.71.

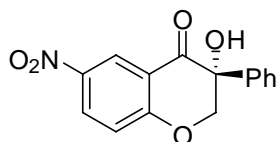

**6e** (entry 5, Table 2): white solid, 95% yield, 93% ee [Daicel Chiralpak AS-H, hexanes/2-propanol = 95/5,  $v = 1.0 \text{ mL} \cdot \text{min}^{-1}$ ,  $\lambda = 230 \text{ nm}$ ,  $t$  (major) = 70.75 min,  $t$  (minor) = 76.28 min];  $[\alpha]_{\text{D}}^{20} = +288.4^\circ$  ( $c = 1.25$ ,  $\text{CHCl}_3$ ).  **$^1\text{H NMR}$**  (300 MHz,  $\text{CDCl}_3$ )  $\delta$  4.21 (s, 1 H), 4.59 (d,  $J = 12.0 \text{ Hz}$ , 1 H), 5.04 (d,  $J = 12.0 \text{ Hz}$ , 1 H), 7.11 (d,  $J = 9.1 \text{ Hz}$ , 1H), 7.35-7.37 (m, 3 H), 7.44-7.47 (m, 2 H), 8.35 (dd,  $J = 3.3, 9.6 \text{ Hz}$ , 1 H), 8.82 (d,  $J = 3.0 \text{ Hz}$ , 1 H);  **$^{13}\text{C NMR}$**  (75 MHz,  $\text{CDCl}_3$ )  $\delta$  73.5, 73.6, 118.8, 119.3, 124.1, 125.9, 129.0, 129.4, 131.0, 136.9, 142.5, 165.0, 192.8; **IR** (KBr):  $\nu_{\text{max}}$  ( $\text{cm}^{-1}$ ) = 3422, 1698, 1619, 1527, 1482, 1338, 1076, 1014, 846, 752, 700, 615, 551, 499; **MS** (EI,  $m/z$ , rel. intensity) 285 ( $\text{M}^+$ , 3), 166 (100); **Anal.** calcd for  $\text{C}_{15}\text{H}_{11}\text{NO}_5$ : C, 63.16; H, 3.89, N, 4.91; Found: C, 63.27; H, 4.13, N, 4.91.

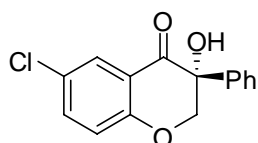

**6f** (entry 6, Table 2): yellow solid, 94% yield, 90% ee [Daicel Chiralcel OD-H, hexanes/2-propanol = 90/10,  $v = 1.0 \text{ mL} \cdot \text{min}^{-1}$ ,  $\lambda = 230 \text{ nm}$ ,  $t$  (major) = 9.23 min,  $t$  (minor) = 10.33 min];  $[\alpha]_{\text{D}}^{20} = +96.2^\circ$  ( $c = 2.23$ ,  $\text{CHCl}_3$ ).  **$^1\text{H NMR}$**  (300 MHz,  $\text{CDCl}_3$ )  $\delta$  4.19 (s, 1 H), 4.45 (d,  $J = 12.0 \text{ Hz}$ , 1 H), 4.86 (d,  $J = 11.7 \text{ Hz}$ , 1 H), 6.91 (d,  $J = 9.0 \text{ Hz}$ , 1 H), 7.31-7.33 (m, 3 H), 7.41-7.45 (m, 3 H), 7.88 (d,  $J = 2.7 \text{ Hz}$ , 1 H);  **$^{13}\text{C NMR}$**  (75 MHz,  $\text{CDCl}_3$ )  $\delta$  73.4, 73.7, 119.7, 119.9, 125.9, 126.8, 127.5, 128.8, 129.0, 136.6, 137.9, 159.9, 193.6; **IR** (KBr):  $\nu_{\text{max}}$  ( $\text{cm}^{-1}$ ) = 3418, 1684, 1605, 1479, 1423, 1279, 1106, 1031, 974, 827, 754, 698, 618, 497; **MS** (EI,  $m/z$ , rel. intensity) 274 ( $\text{M}^+$ , 10), 155 (100); **Anal.** calcd for  $\text{C}_{15}\text{H}_{11}\text{ClO}_3$ : C, 65.58; H, 4.04; Found: C, 65.76; H, 4.22.

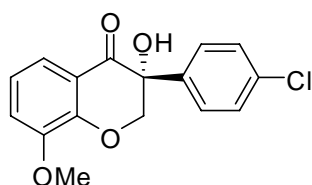

**6g** (entry 7, Table 2): white solid, 96% yield, 74% ee [Daicel Chiralpak AD-H, hexanes/2-propanol = 80/20,  $\nu = 1.0 \text{ mL} \cdot \text{min}^{-1}$ ,  $\lambda = 230 \text{ nm}$ ,  $t$  (major) = 36.12 min,  $t$  (minor) = 38.28 min];  $[\alpha]_{\text{D}}^{20} = +14.2^\circ$  ( $c = 1.57$ ,  $\text{CHCl}_3$ ).  **$^1\text{H}$  NMR** (300 MHz,  $\text{CDCl}_3$ )  $\delta$  3.87, (s, 3 H), 4.29 (br, 1 H), 4.48 (d,  $J = 11.7 \text{ Hz}$ , 1 H), 4.95 (d,  $J = 11.7 \text{ Hz}$ , 1 H), 6.98-7.09 (m, 2 H), 7.26 (d,  $J = 7.2 \text{ Hz}$ , 2 H), 7.40 (d,  $J = 8.4 \text{ Hz}$ , 2 H), 7.49 (d,  $J = 8.1 \text{ Hz}$ , 1 H);  **$^{13}\text{C}$  NMR** (75 MHz,  $\text{CDCl}_3$ )  $\delta$  56.1, 72.8, 73.9, 117.4, 118.5, 119.4, 121.8, 127.5, 128.9, 134.7, 136.6, 148.6, 151.2, 194.1; **IR** (KBr):  $\nu_{\text{max}}$  ( $\text{cm}^{-1}$ ) = 3449, 1685, 1607, 1491, 1299, 1257, 1042, 904, 839, 760, 728, 625, 527, 487, 404; **MS** (EI,  $m/z$ , rel. intensity) 304 ( $\text{M}^+$ , 14), 151 (100); **Anal.** calcd for  $\text{C}_{16}\text{H}_{13}\text{ClO}_4$ : C, 63.06; H, 4.30; Found: C, 63.11; H, 4.46.

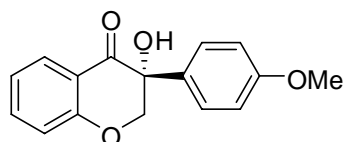

**6h** (entry 8, Table 2): white solid, 93% yield, 90% ee [Daicel Chiralpak AD-H, hexanes/2-propanol = 75/25,  $\nu = 0.5 \text{ mL} \cdot \text{min}^{-1}$ ,  $\lambda = 230 \text{ nm}$ ,  $t$  (minor) = 25.54 min,  $t$  (major) = 31.13 min];  $[\alpha]_{\text{D}}^{20} = +74.3^\circ$  ( $c = 1.00$ ,  $\text{CHCl}_3$ ).  **$^1\text{H}$  NMR** (300 MHz,  $\text{CDCl}_3$ )  $\delta$  3.73 (s, 3 H), 4.27 (s, 1 H), 4.43 (d,  $J = 11.4 \text{ Hz}$ , 1 H), 4.83 (d,  $J = 12.0 \text{ Hz}$ , 1 H), 6.82 (d,  $J = 7.2 \text{ Hz}$ , 2 H), 6.94 (d,  $J = 8.4 \text{ Hz}$ , 1 H), 7.03 (t,  $J = 7.2 \text{ Hz}$ , 1 H), 7.39 (m, 2 H), 7.48 (m, 1 H), 7.91 (dd,  $J = 1.5, 7.8 \text{ Hz}$ , 1 H);  **$^{13}\text{C}$  NMR** (75 MHz,  $\text{CDCl}_3$ )  $\delta$  55.1, 73.0, 73.5, 114.0, 117.9, 119.1, 121.8, 127.4, 127.5, 130.2, 136.6, 159.8, 161.3, 194.6; **IR** (KBr):  $\nu_{\text{max}}$  ( $\text{cm}^{-1}$ ) = 3429, 2968, 2839, 1687, 1608, 1516, 1479, 1261, 1017, 829, 758, 602, 553, 495, 410; **MS** (EI,  $m/z$ , rel. intensity) 270 ( $\text{M}^+$ , 2), 135 (100); **Anal.** calcd for  $\text{C}_{16}\text{H}_{14}\text{O}_4$ : C, 71.10; H, 5.22; Found: C, 70.75; H, 5.41.

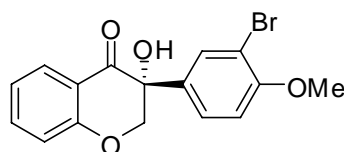

**6i** (entry 9, Table 2): white solid, 99% yield, 87% ee [Daicel Chiralpak AD-H, hexanes/2-propanol = 90/10,  $\nu = 1.0 \text{ mL} \cdot \text{min}^{-1}$ ,  $\lambda = 230 \text{ nm}$ ,  $t$  (minor) = 30.81 min,  $t$

(major) = 35.33 min];  $[\alpha]_D^{20} = +36.3^\circ$  (c = 1.85, CHCl<sub>3</sub>). **<sup>1</sup>H NMR** (300 MHz, CDCl<sub>3</sub>)  $\delta$  3.83 (s, 3 H), 4.27 (s, 1 H), 4.43 (d, *J* = 11.7 Hz, 1 H), 4.79 (d, *J* = 11.7 Hz, 1 H), 6.79 (d, *J* = 8.4 Hz, 1 H), 6.97 (d, *J* = 11.7 Hz, 1 H), 7.06 (t, *J* = 8.1 Hz, 1 H), 7.32 (dd, *J* = 2.4, 8.4 Hz, 1 H), 7.49-7.54 (m, 1 H), 7.70 (d, *J* = 2.4 Hz 1 H), 7.91 (dd, *J* = 1.8, 7.8 Hz, 1 H); **<sup>13</sup>C NMR** (75 MHz, CDCl<sub>3</sub>)  $\delta$  56.2, 72.6, 73.4, 111.6, 112.0, 118.0, 118.8, 122.1, 126.3, 127.7, 131.2, 131.8, 136.9, 156.1, 161.3, 194.0; **IR** (KBr):  $\nu_{\max}$  (cm<sup>-1</sup>) = 3420, 3387, 1683, 1603, 1500, 1477, 1458, 1266, 1016, 948, 817, 754, 680, 625, 507; **MS** (EI, *m/z*, rel. intensity) 348 (M<sup>+</sup>, 2), 121 (100); **Anal.** calcd for C<sub>16</sub>H<sub>13</sub>BrO<sub>4</sub>: C, 55.04; H, 3.75; Found: C, 55.04; H, 4.03.

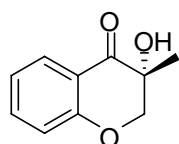

**6j**<sup>[7]</sup> (entry 10, Table 2): white solid, 94% yield, 2% ee [Daicel Chiralpak AD-H, hexanes/2-propanol = 98/2,  $\nu$  = 1.0 mL · min<sup>-1</sup>,  $\lambda$  = 230 nm, t (major) = 22.57 min, t (minor) = 27.78 min];  $[\alpha]_D^{20} = +0.2^\circ$  (c = 1.05, CHCl<sub>3</sub>). **<sup>1</sup>H NMR** (300 MHz, CDCl<sub>3</sub>)  $\delta$  1.44 (s, 3 H), 3.89 (s, 1 H), 4.19 (d, *J* = 11.1 Hz, 1 H), 4.28 (d, *J* = 11.4 Hz, 1 H), 6.96 (d, *J* = 8.1 Hz, 1 H), 7.03 (t, *J* = 7.5 Hz, 1 H), 7.49 (t, *J* = 7.8 Hz, 1 H), 7.86 (d, *J* = 7.8 Hz, 1 H); **<sup>13</sup>C NMR** (75 MHz, CDCl<sub>3</sub>)  $\delta$  22.3, 70.6, 74.5, 117.8, 118.1, 121.8, 127.6, 136.5, 161.2, 196.5.

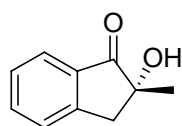

**6l**<sup>[10]</sup>: colorless oil, 87% yield, 48% ee [Daicel Chiralpak AS-H, hexanes/2-propanol = 90/10,  $\nu$  = 0.7 mL · min<sup>-1</sup>,  $\lambda$  = 230 nm, t (major) = 13.38 min, t (minor) = 25.63 min];  $[\alpha]_D^{20} = +26.4^\circ$  (c = 0.60, CHCl<sub>3</sub>). **<sup>1</sup>H NMR** (300 MHz, CDCl<sub>3</sub>)  $\delta$  1.45 (s, 3 H), 3.22 (s, 1 H), 3.23 (d, *J* = 16.8 Hz, 1 H), 3.29 (d, *J* = 16.8 Hz, 1 H), 7.38 (d, *J* = 7.5 Hz, 1 H), 7.43 (d, *J* = 8.1 Hz, 1 H), 7.64 (dt, *J* = 1.2, 7.5 Hz, 1 H), 7.77 (d, *J* = 8.1 Hz, 1 H), .

## Referance

- [1] Enders, D.; Niemeier, O.; Raabe, G. *Synlett* **2006**, 2431.
- [2] Hachisu, Y.; Bode, J. W.; Suzuki, K. *Adv. Synth. Catal.* **2004**, 346, 1097
- [3] Liu, K. S.; Ding, Y. S. *Chirality* **2004**, 16, 475.
- [4] Chen, Y.-K.; Jeon, S.-J.; Walsh, P. J.; Nugent, W. A.; Kendall, C.; Wipf, P. *Organic Synthesis* **2005**, 82, 87.
- [5] Kerr, M. S.; Read de Alaniz, J.; Rovis, T. *J. Org. Chem.* **2005**, 70, 5725.
- [6] Clerici, A.; Pastori, N.; Porta, O. *Tetrahedron* **1998**, 54, 15679.
- [7] Takikawa, H.; Suzuki, K. *Org. Lett.* **2007**, 9, 2713.
- [8] Bu, X. L.; Jing, H. W.; Wang, L.; Chang, T.; Jin, L. L.; Liang, Y. M. *J. Mol. Catal. A: Chem.* **2006**, 121.
- [9] Baker, B.; Pollard, A.; Robinson, R. *J. Chem. Soc.* **1929**, 1468.
- [10] Takikawa, H.; Hachisu, Y.; Bode, J. W.; Suzuki, K. *Angew. Chem. Int. Ed.* **2006**, 45, 3492.
- [11] The compound **5i** has poor solubility in various solvents such as THF, acetone, DMSO. It deposited easily during the hydrolysis of the corresponding acetal, and simply filtration of the reaction mixture afforded the compound which was pure enough for the next reaction.

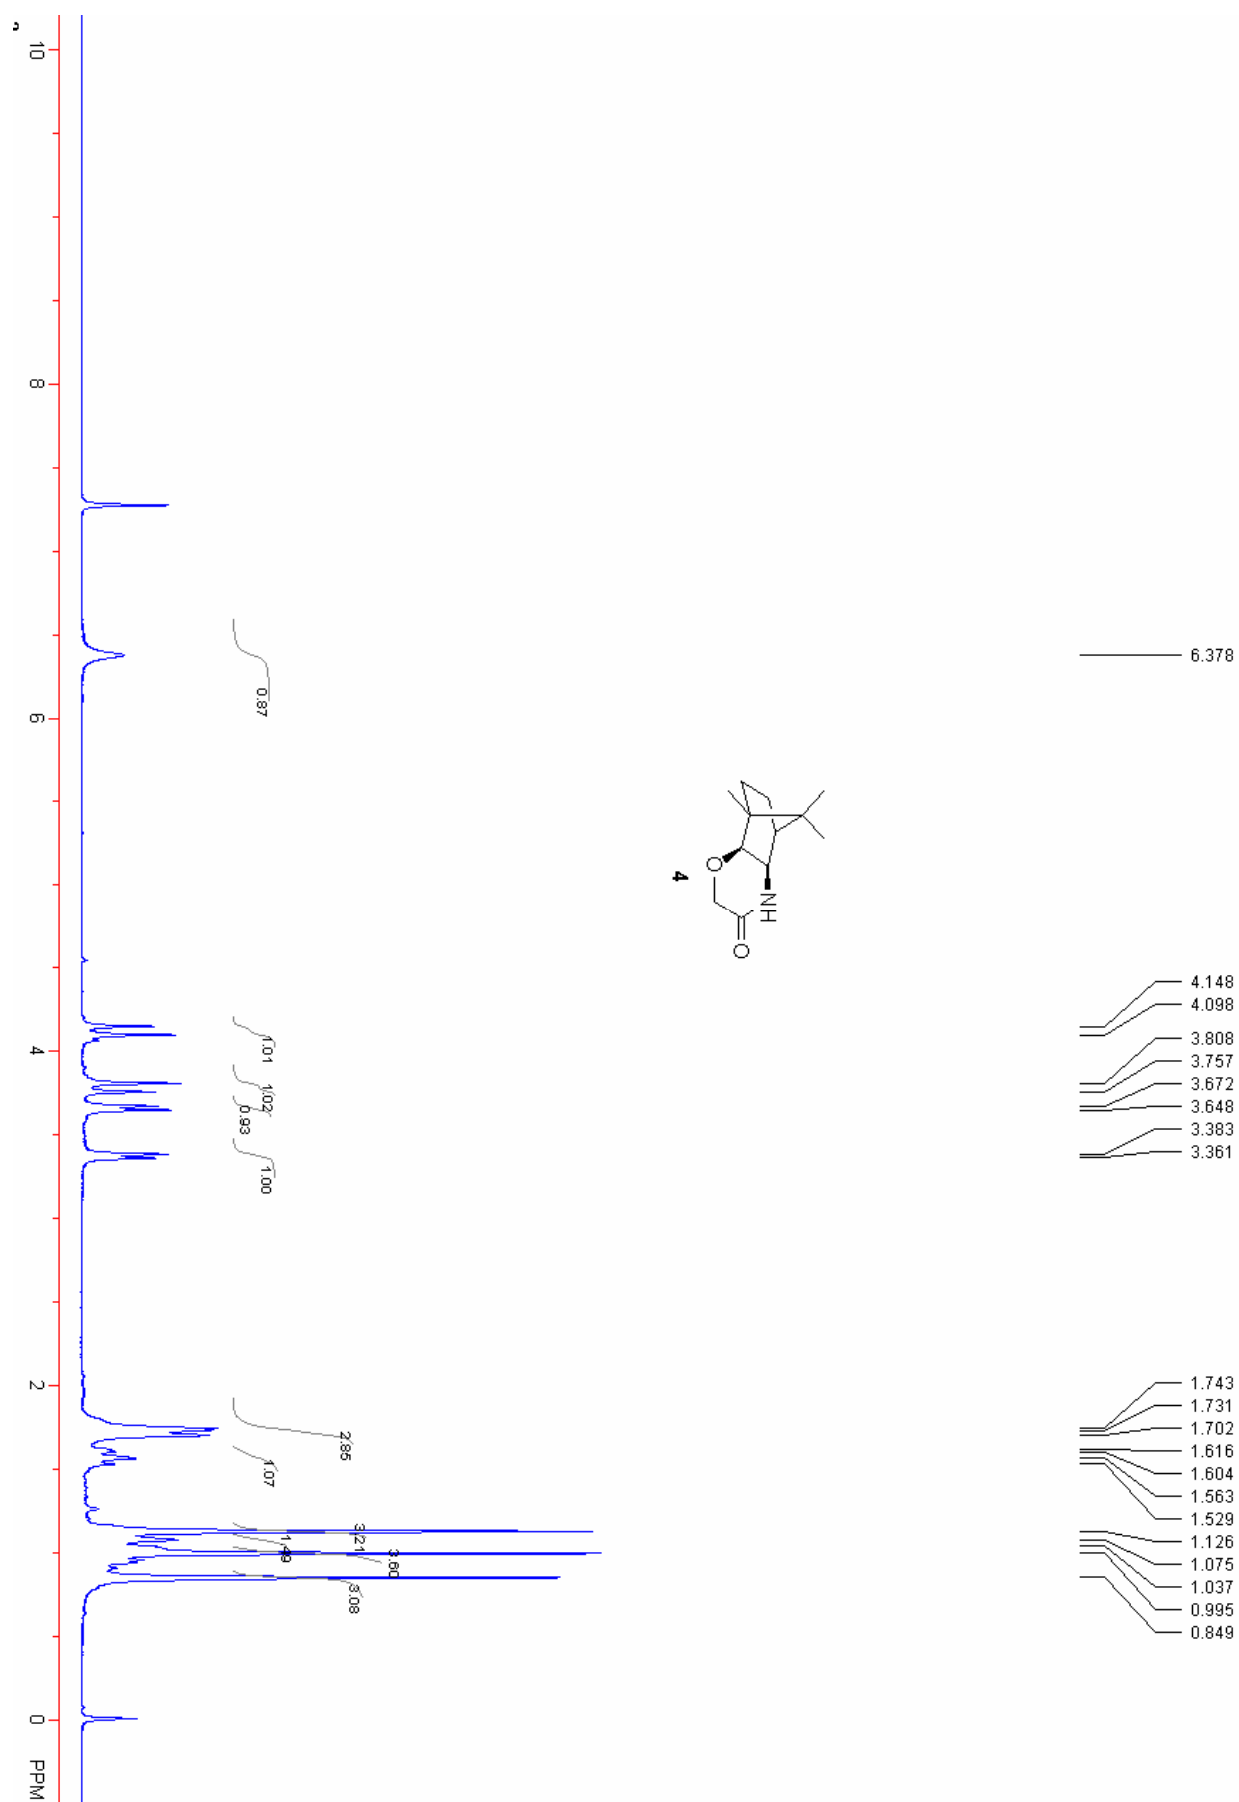

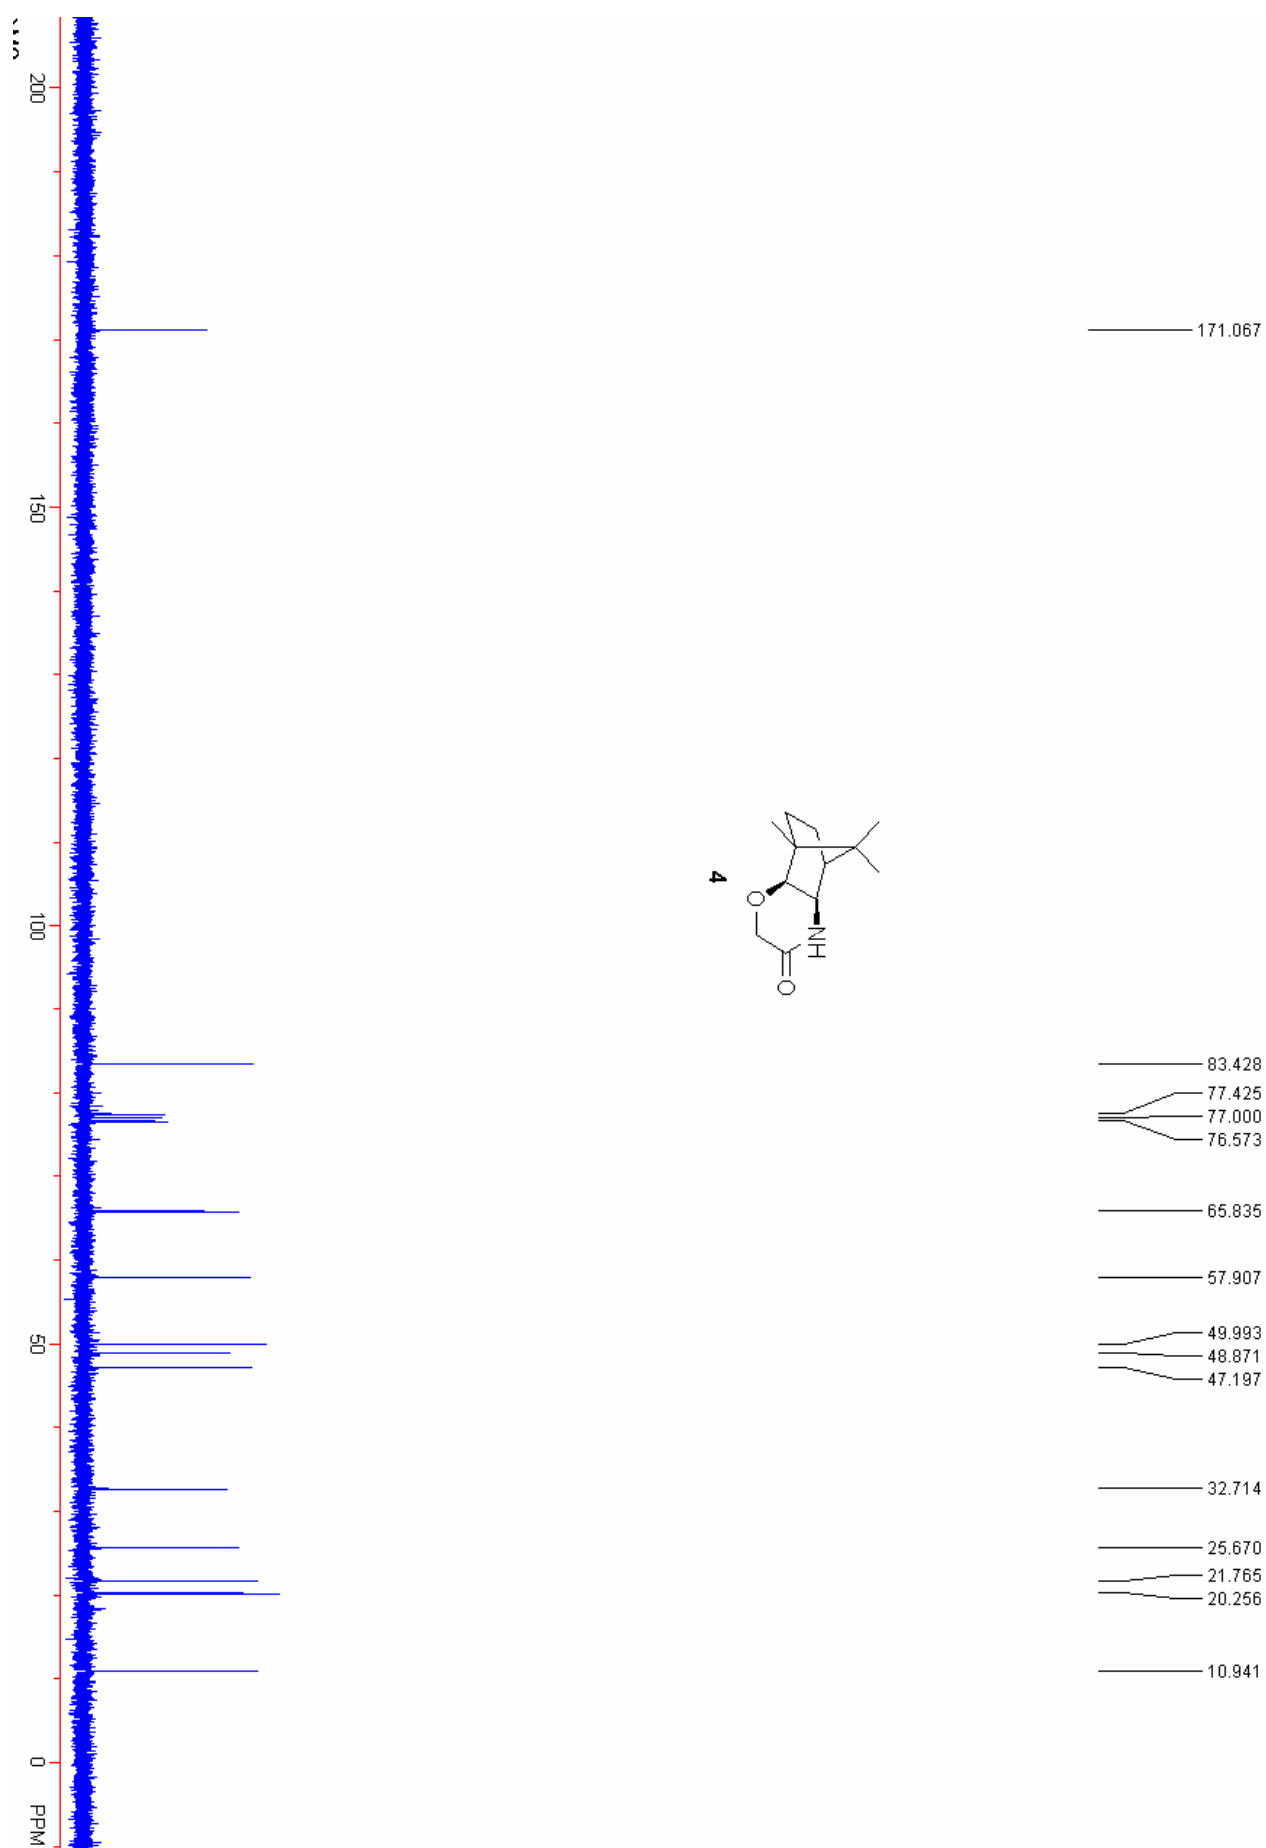

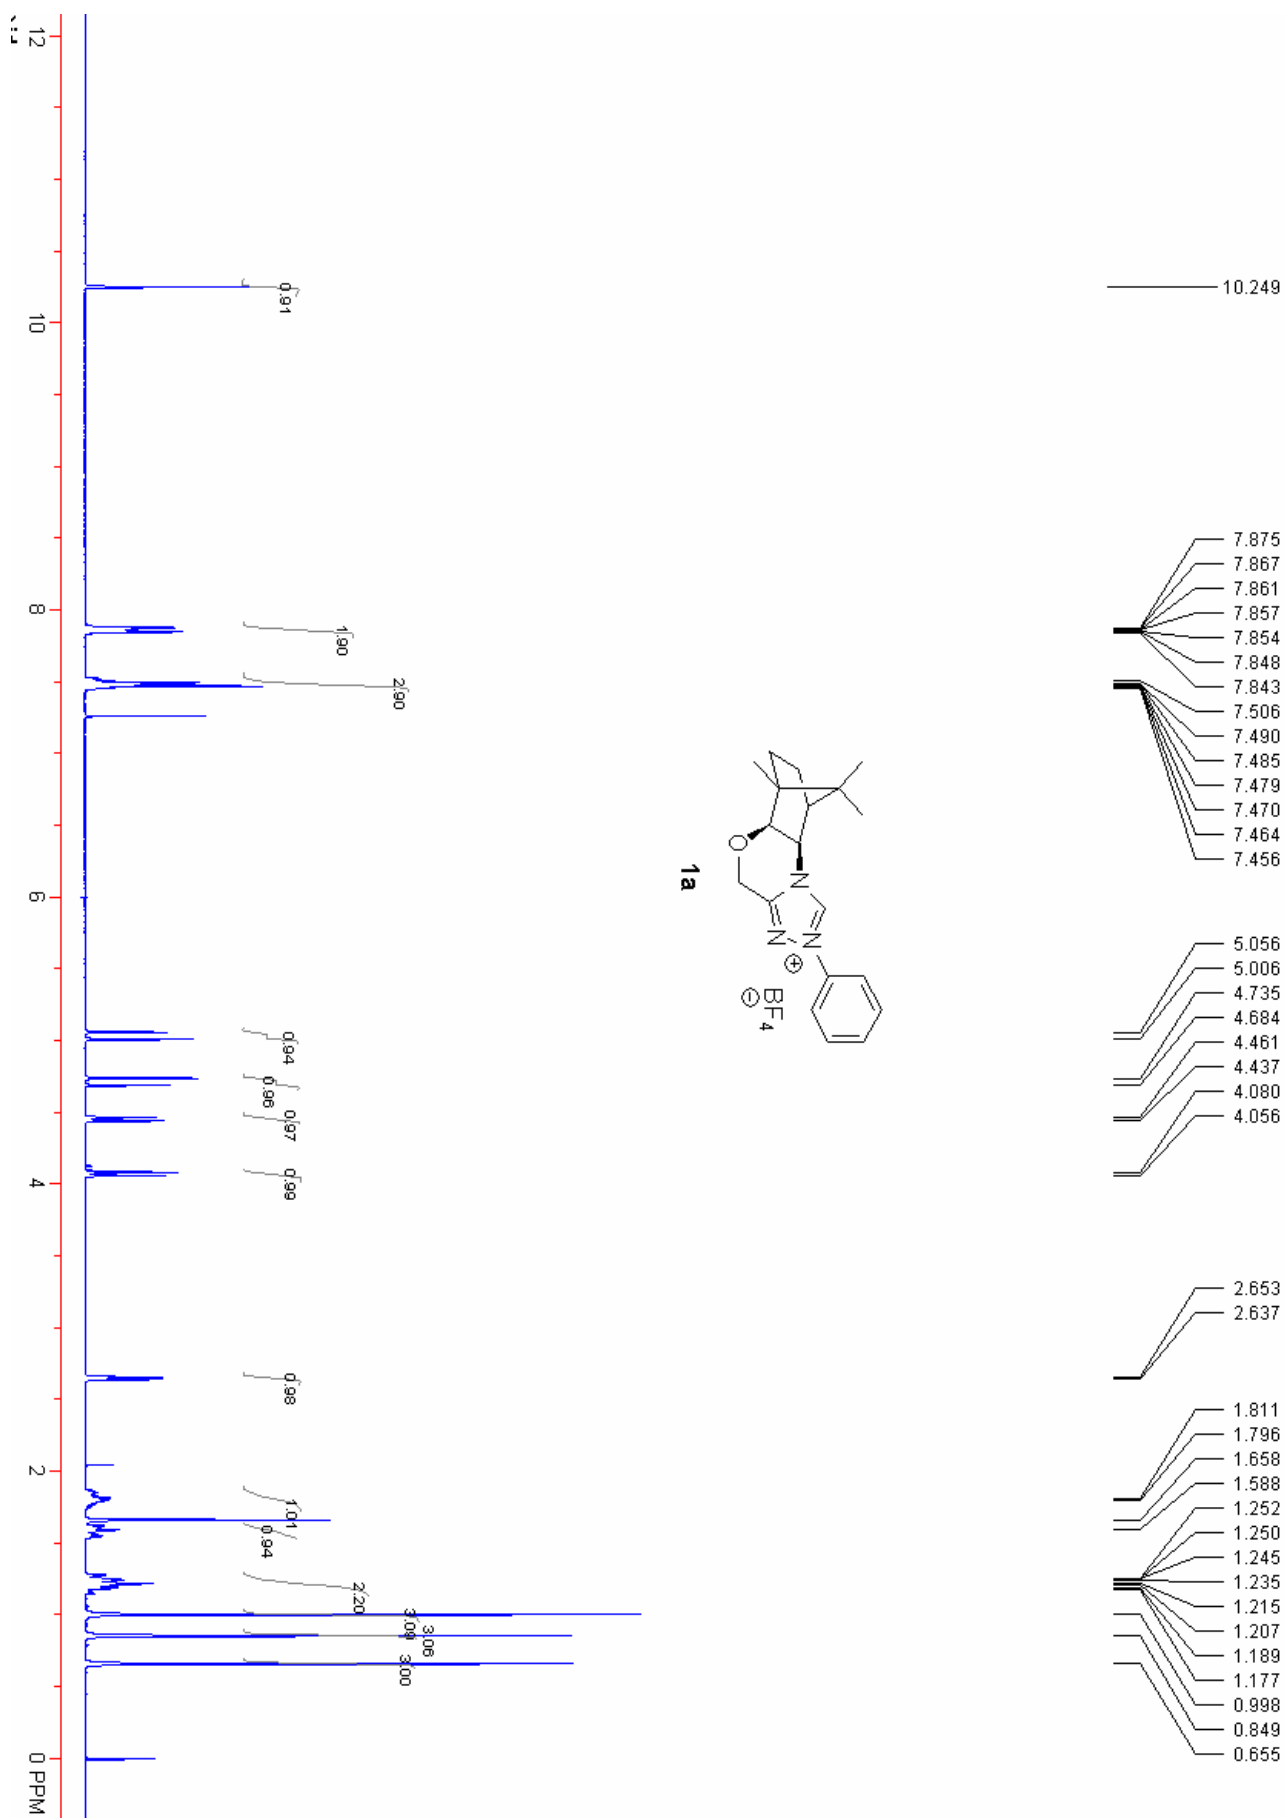

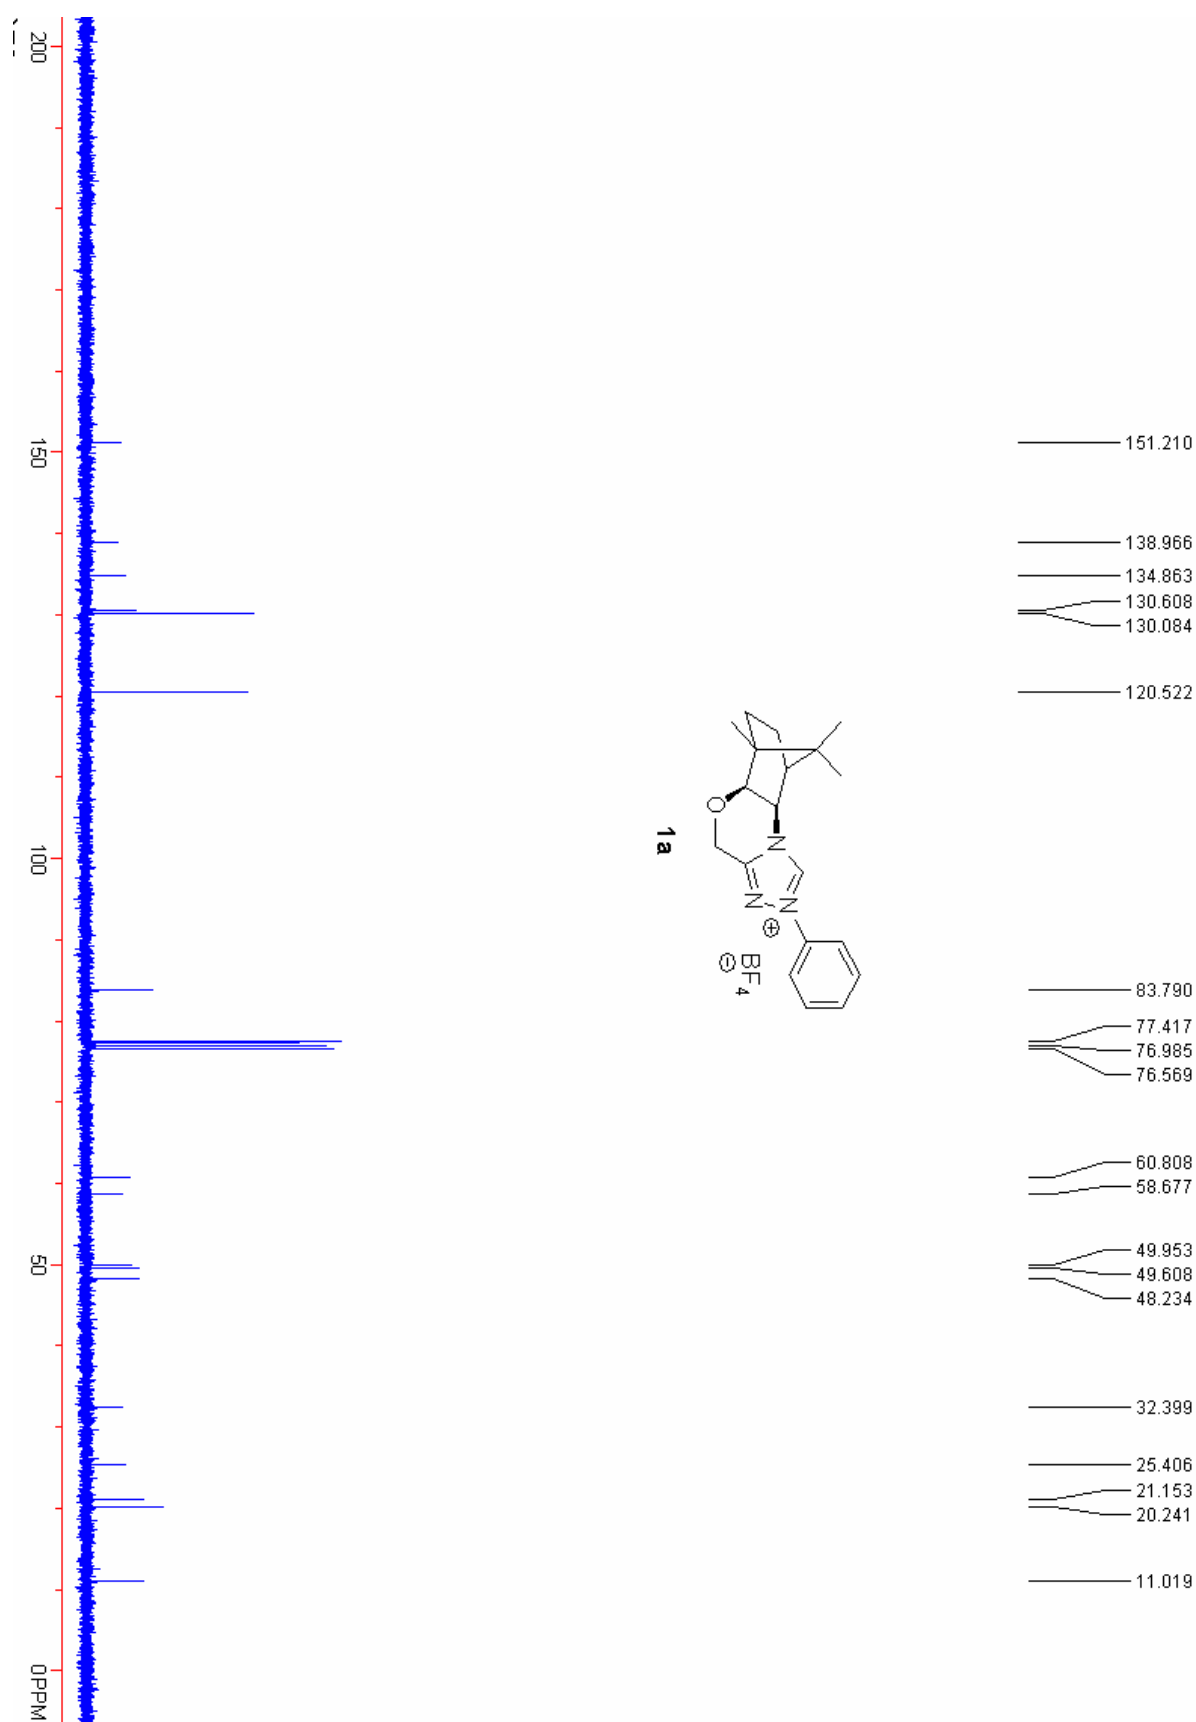

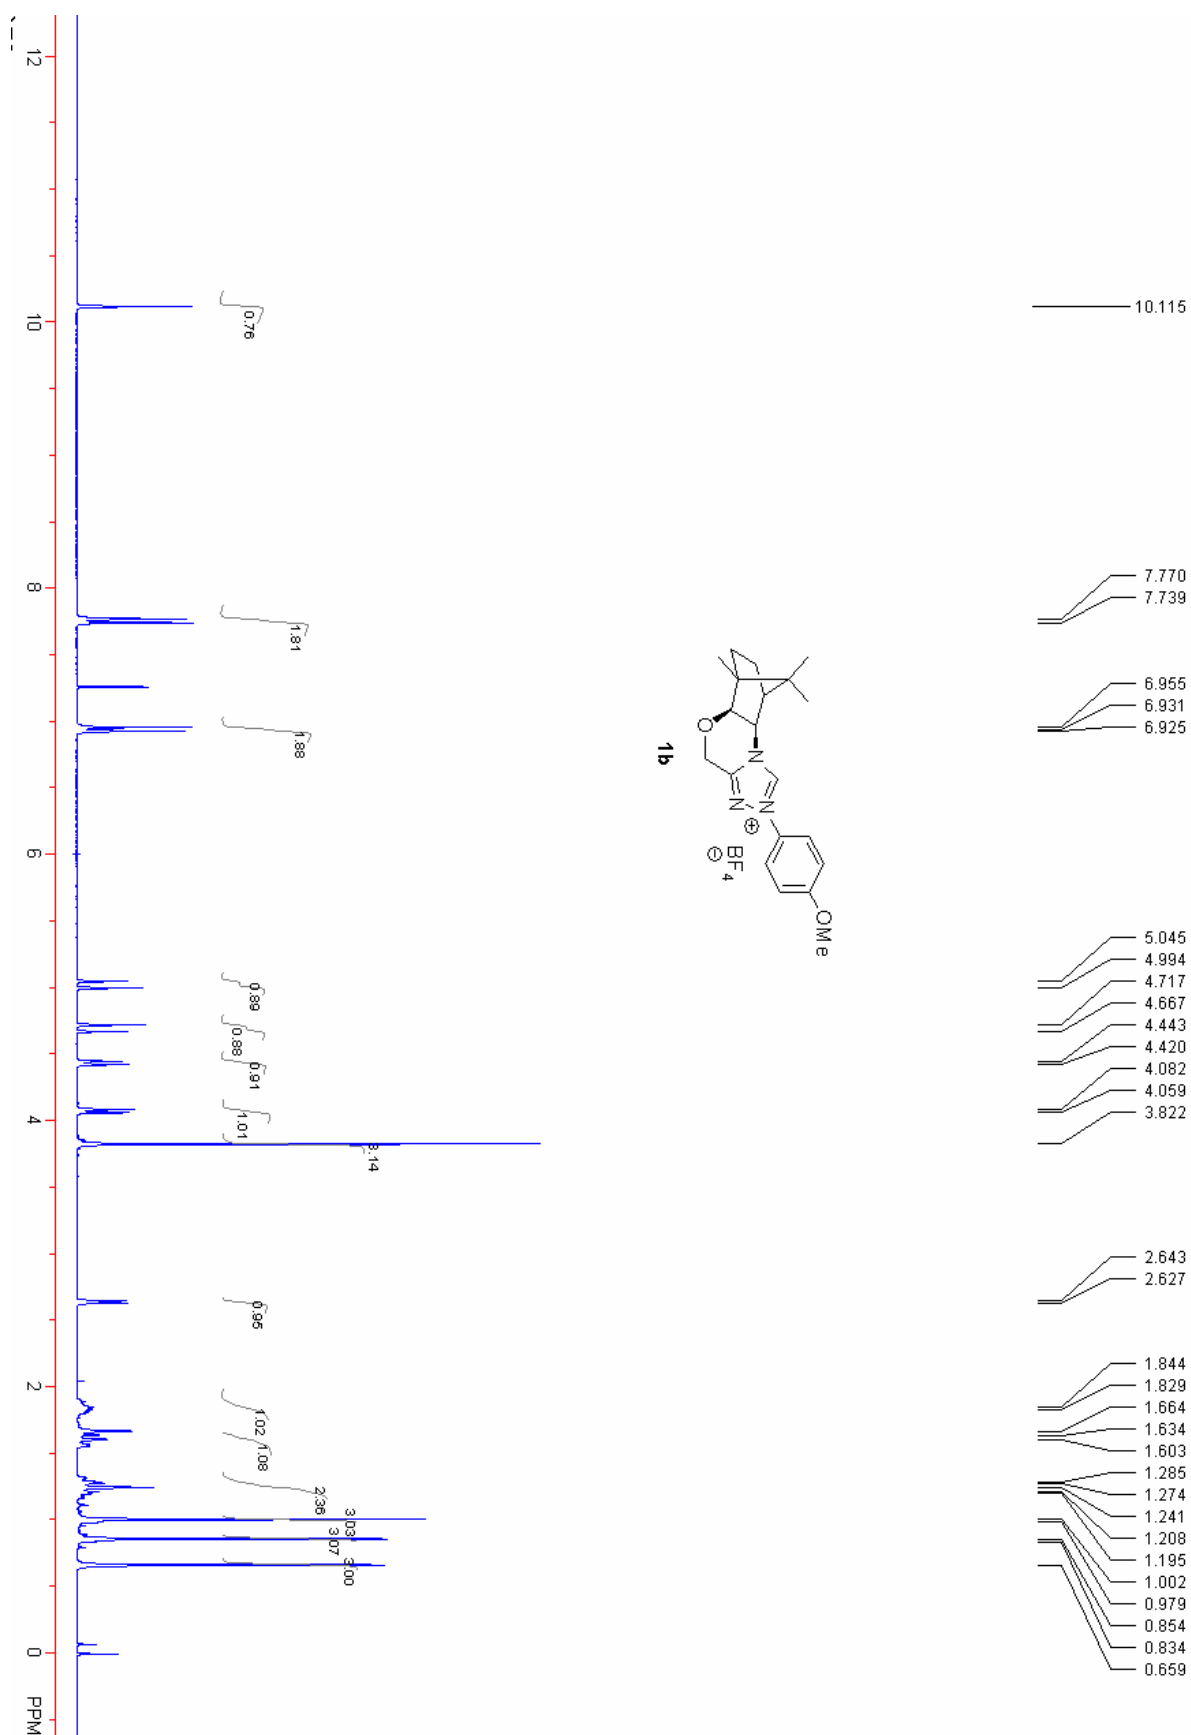

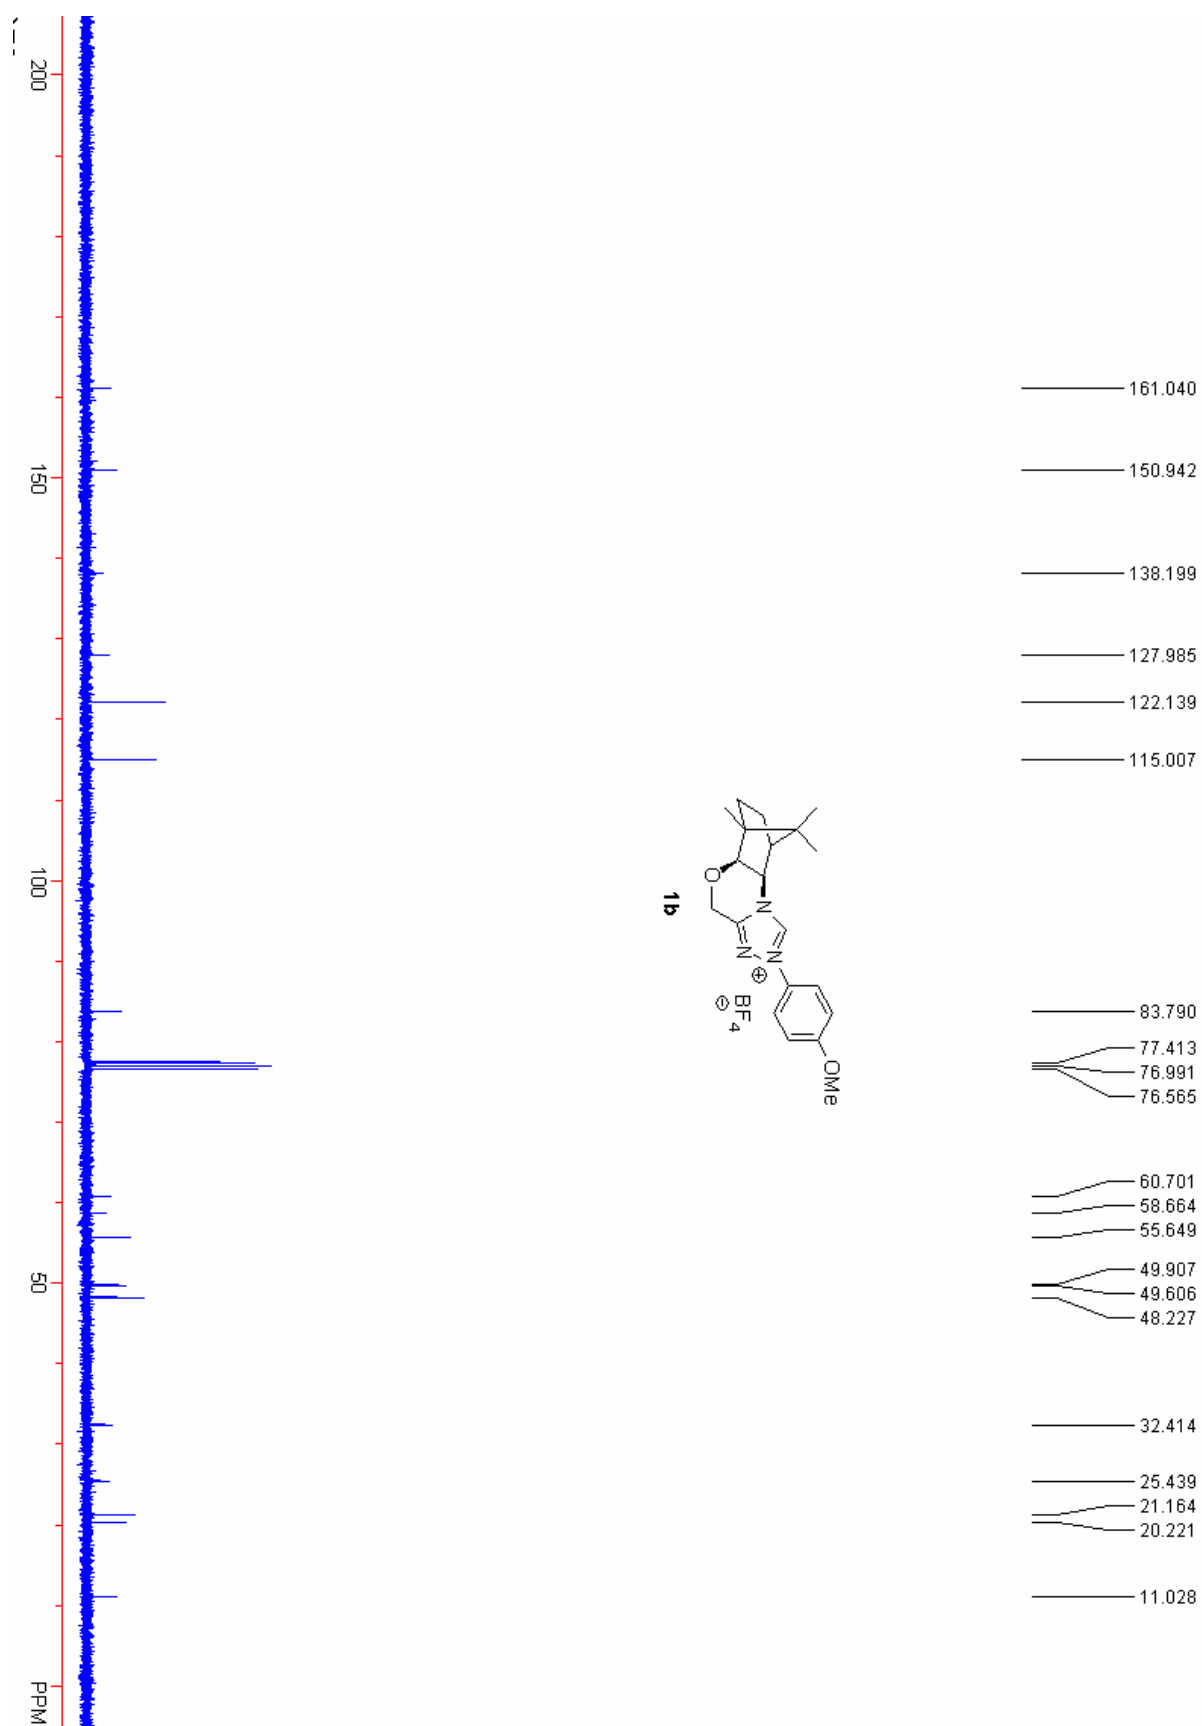

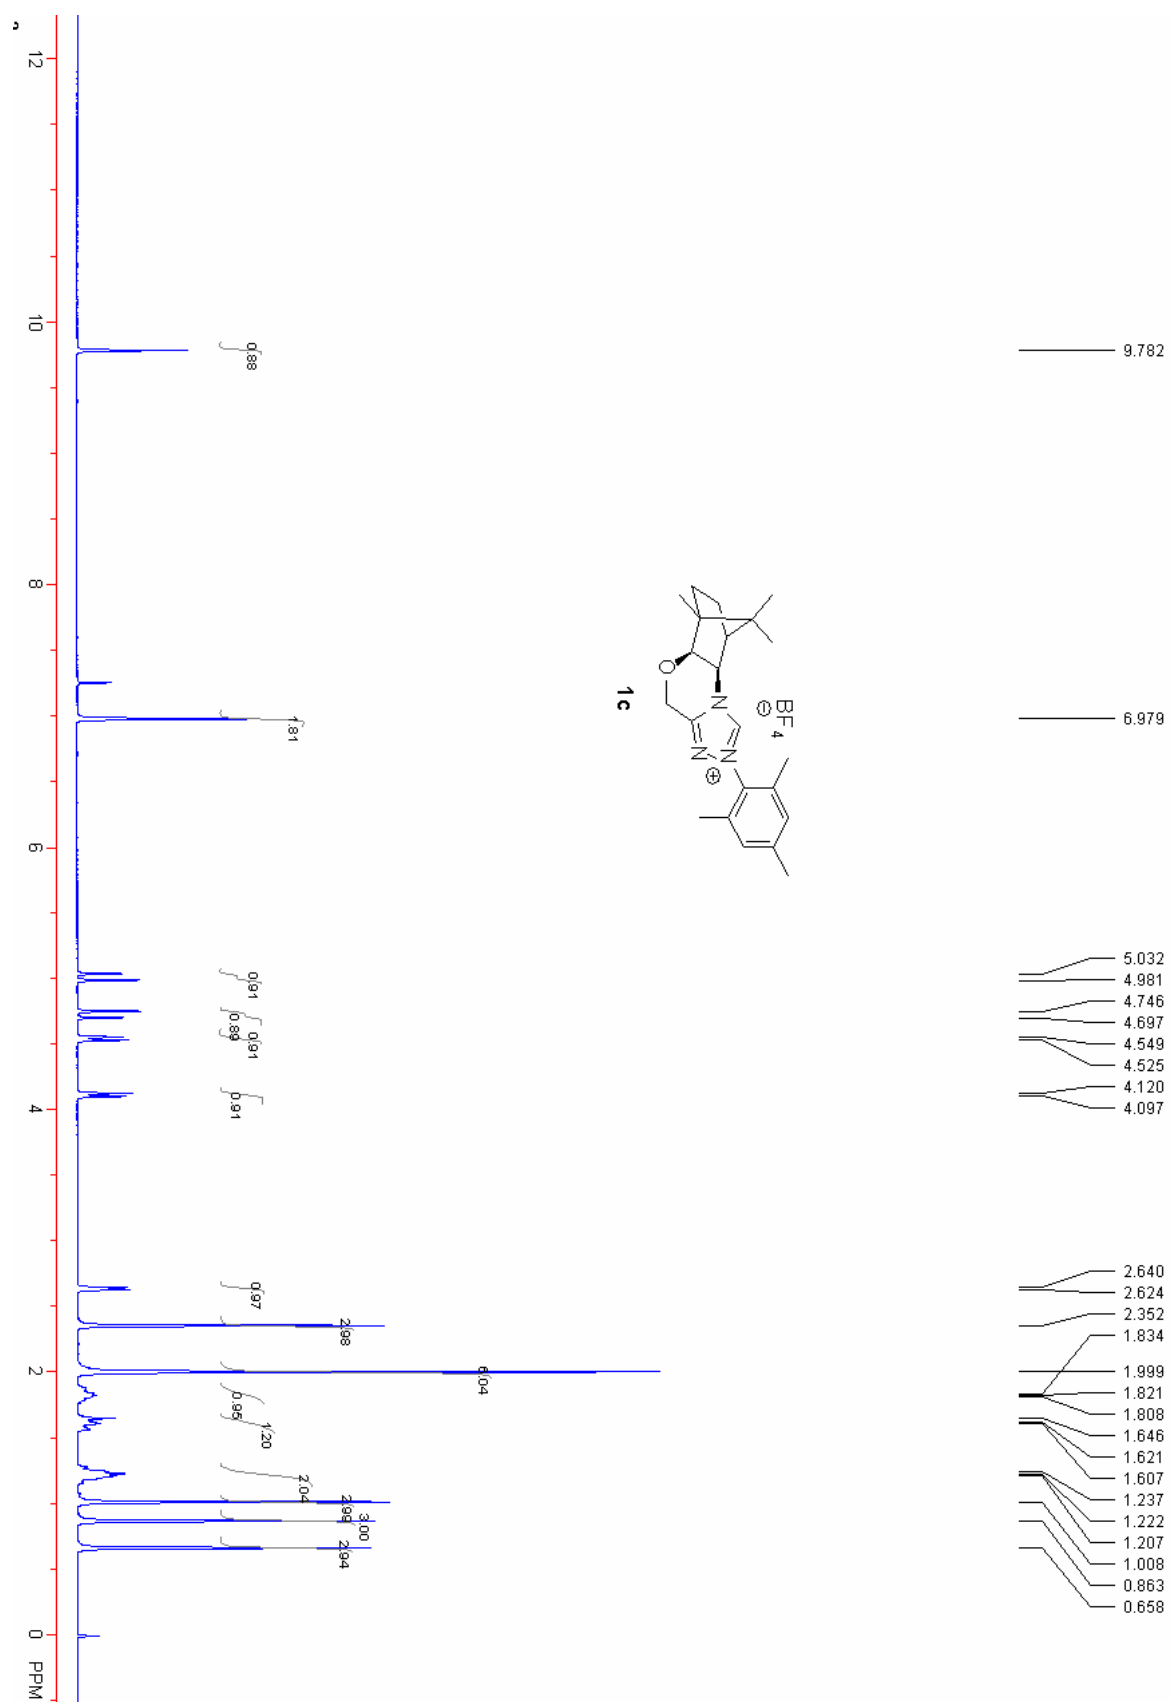

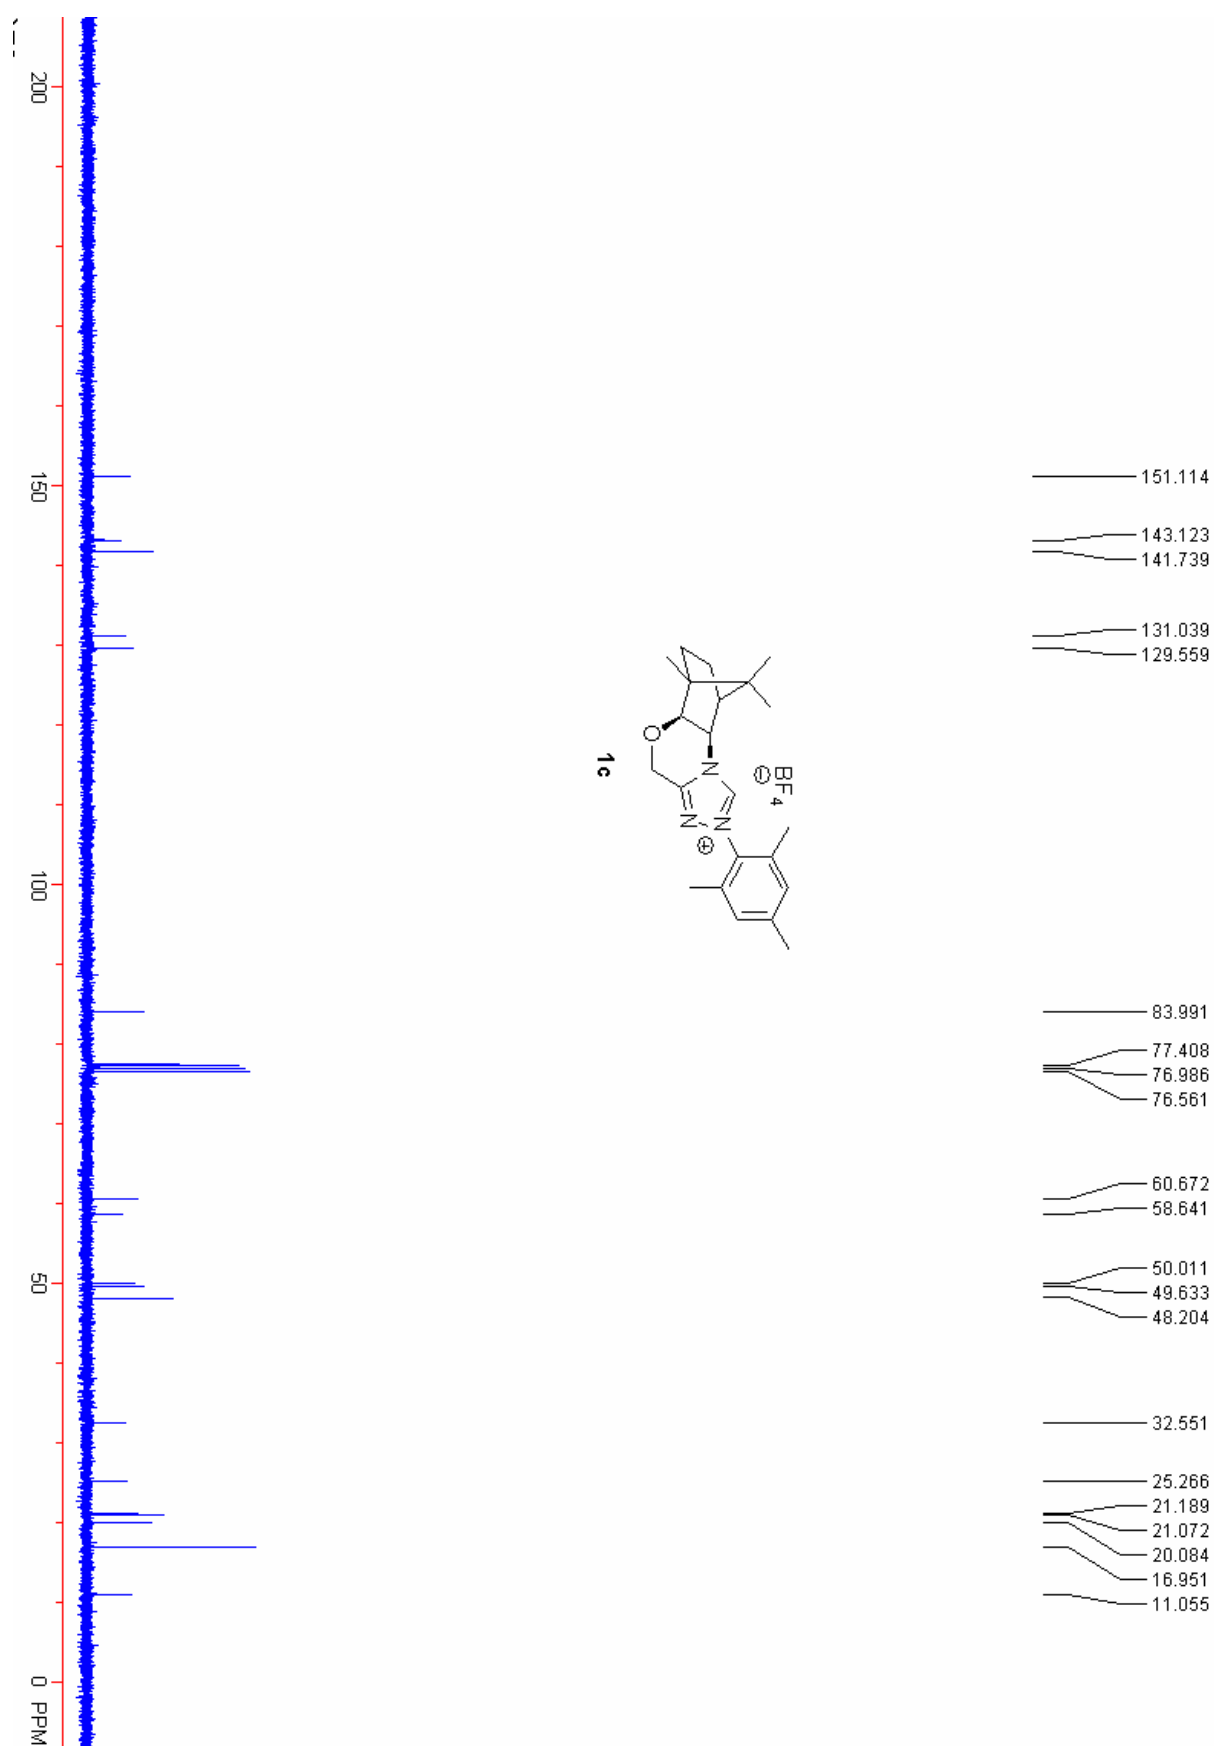

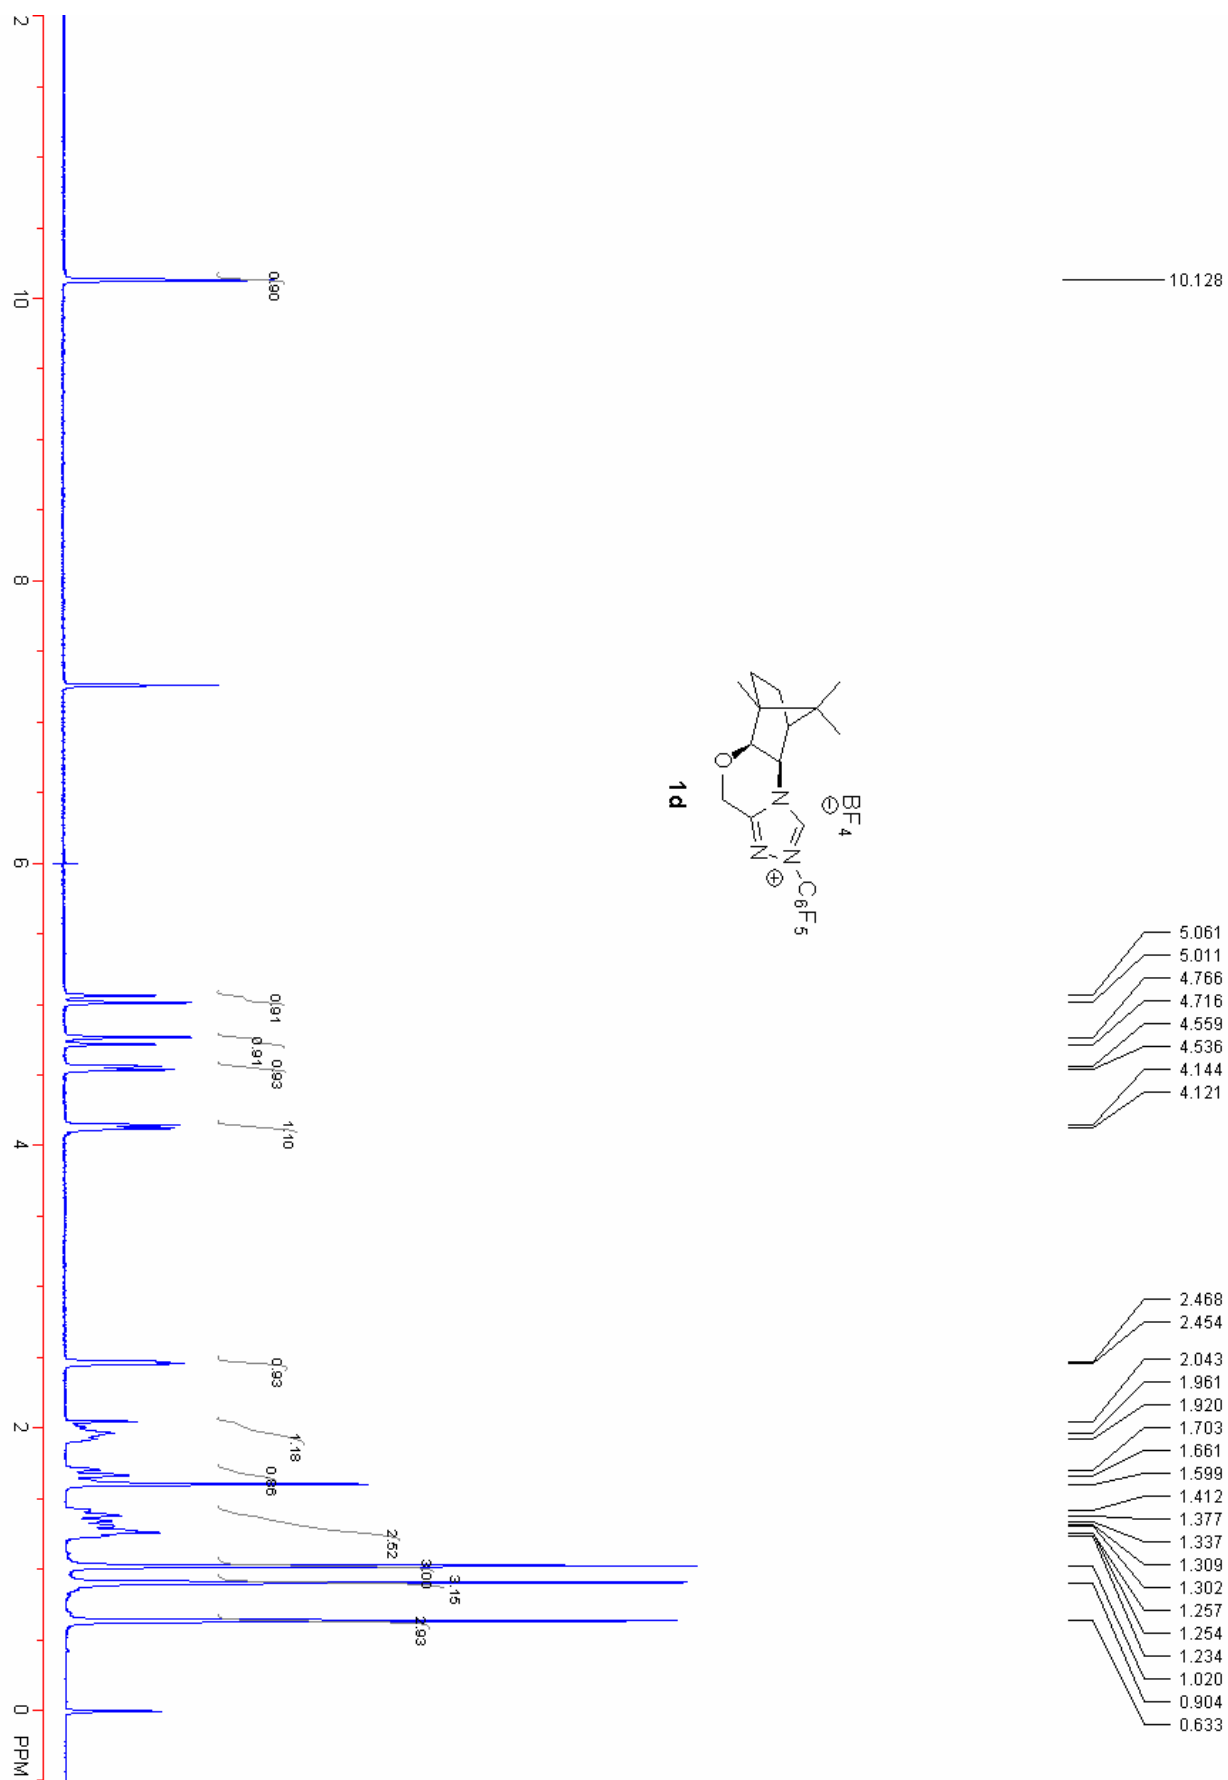

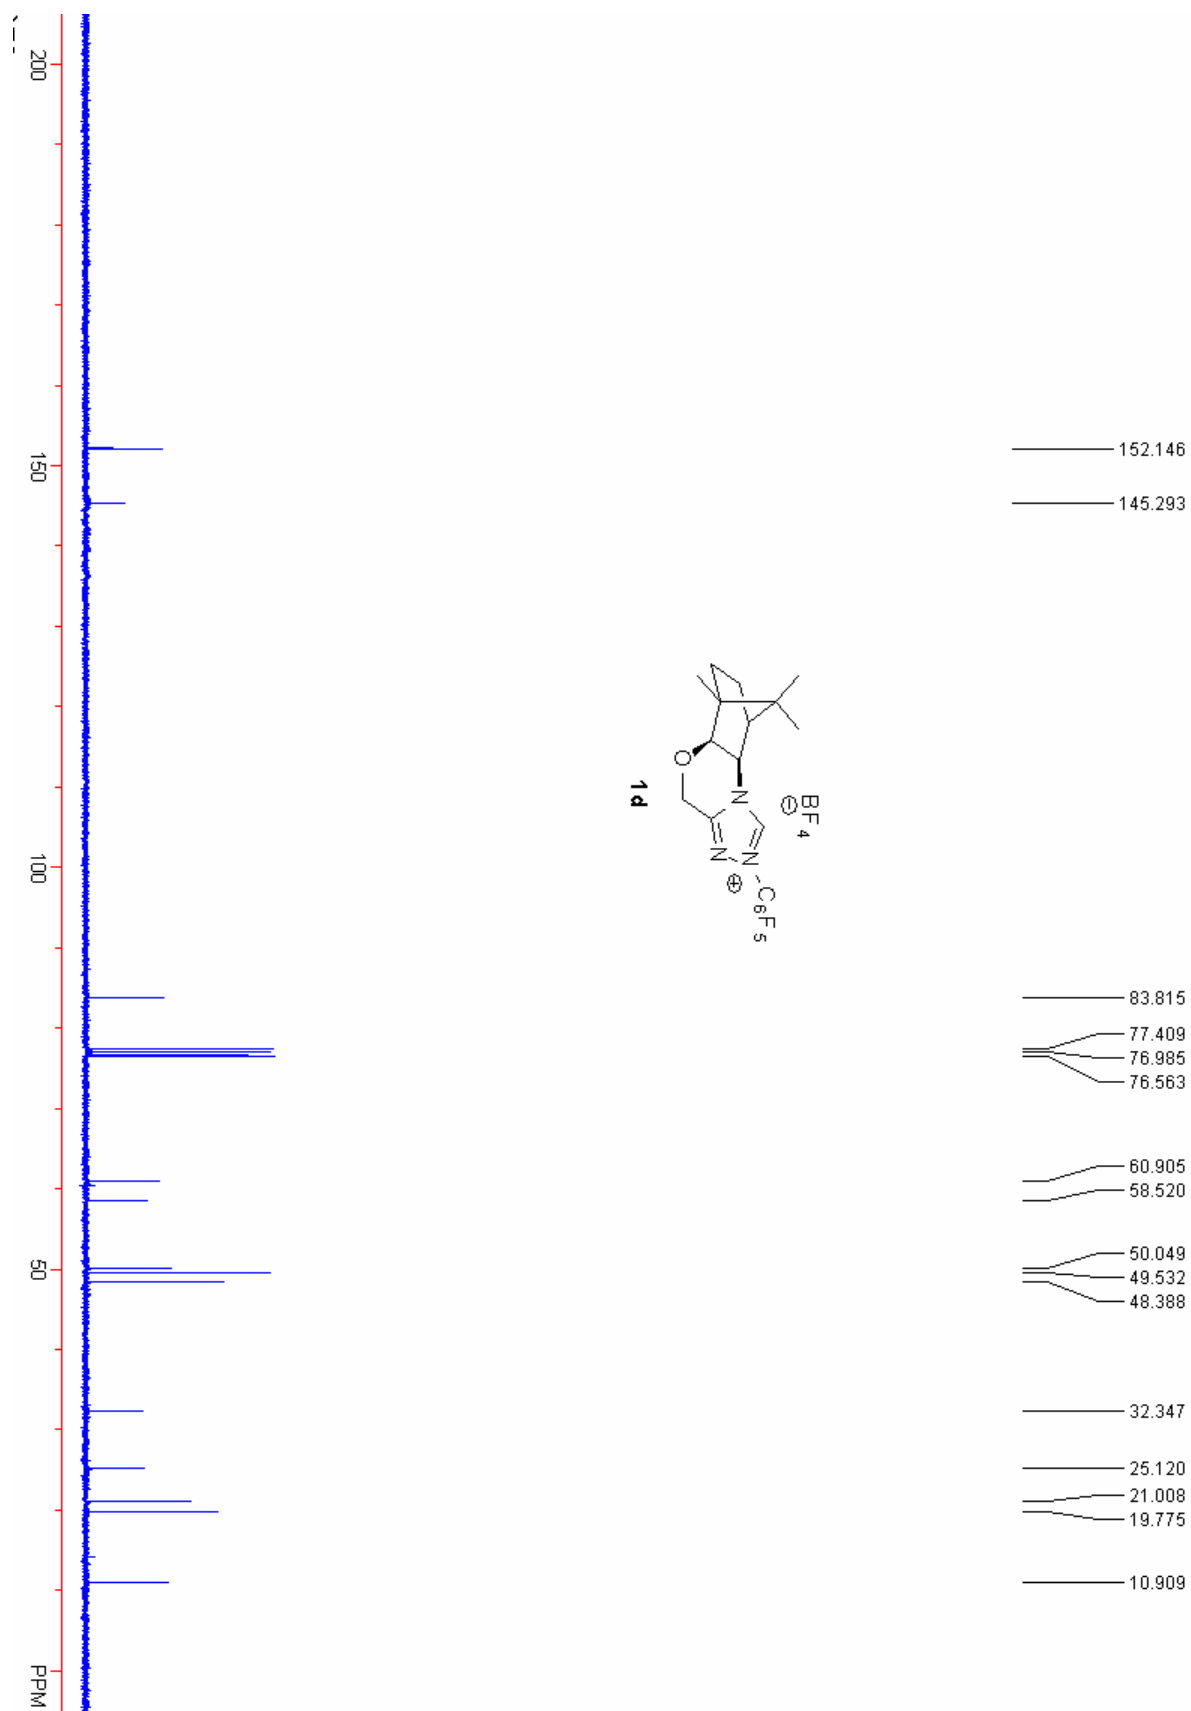

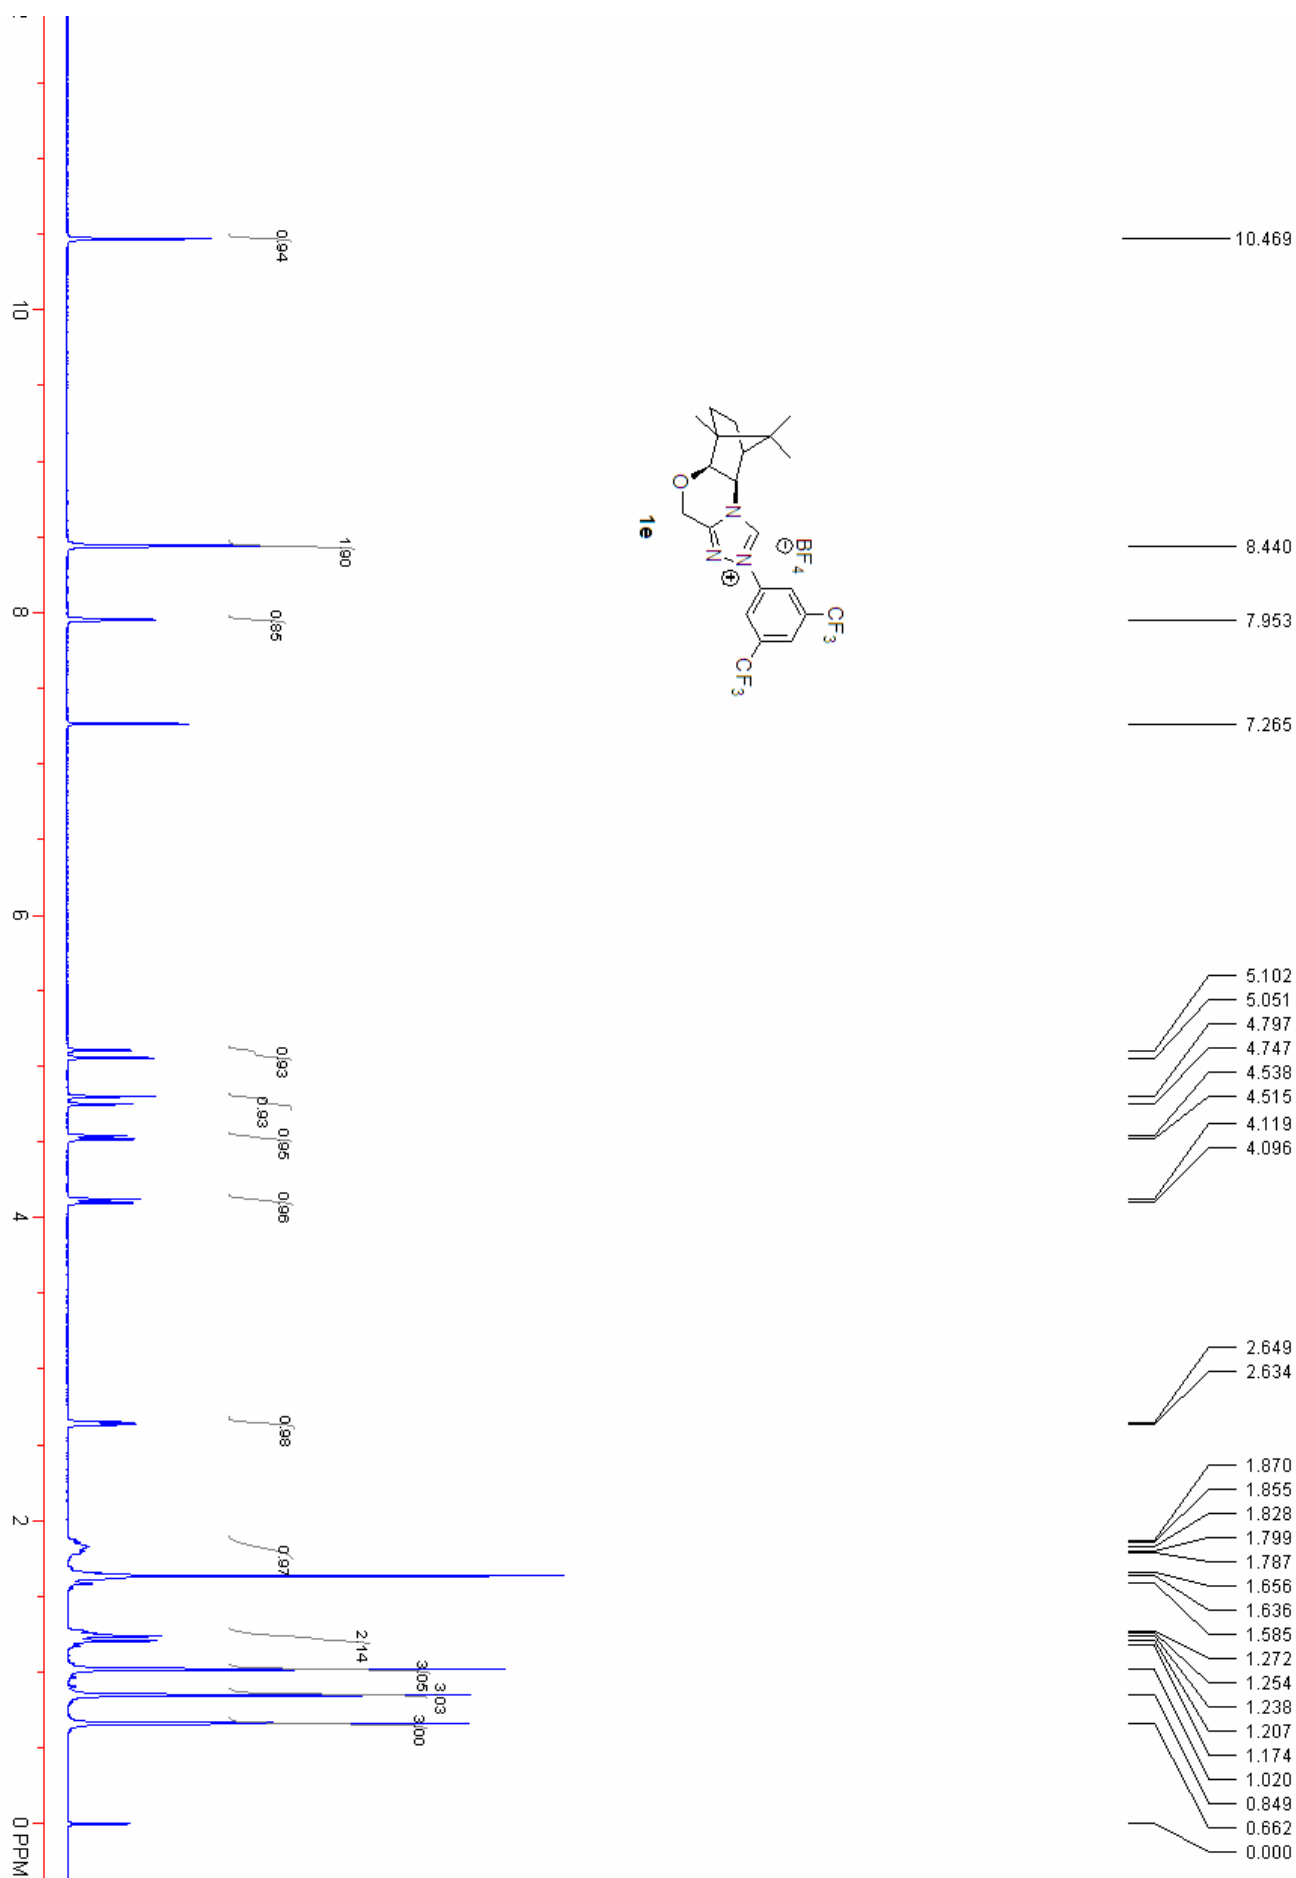

ly-3-64C  
Pulse Sequence: szpu1

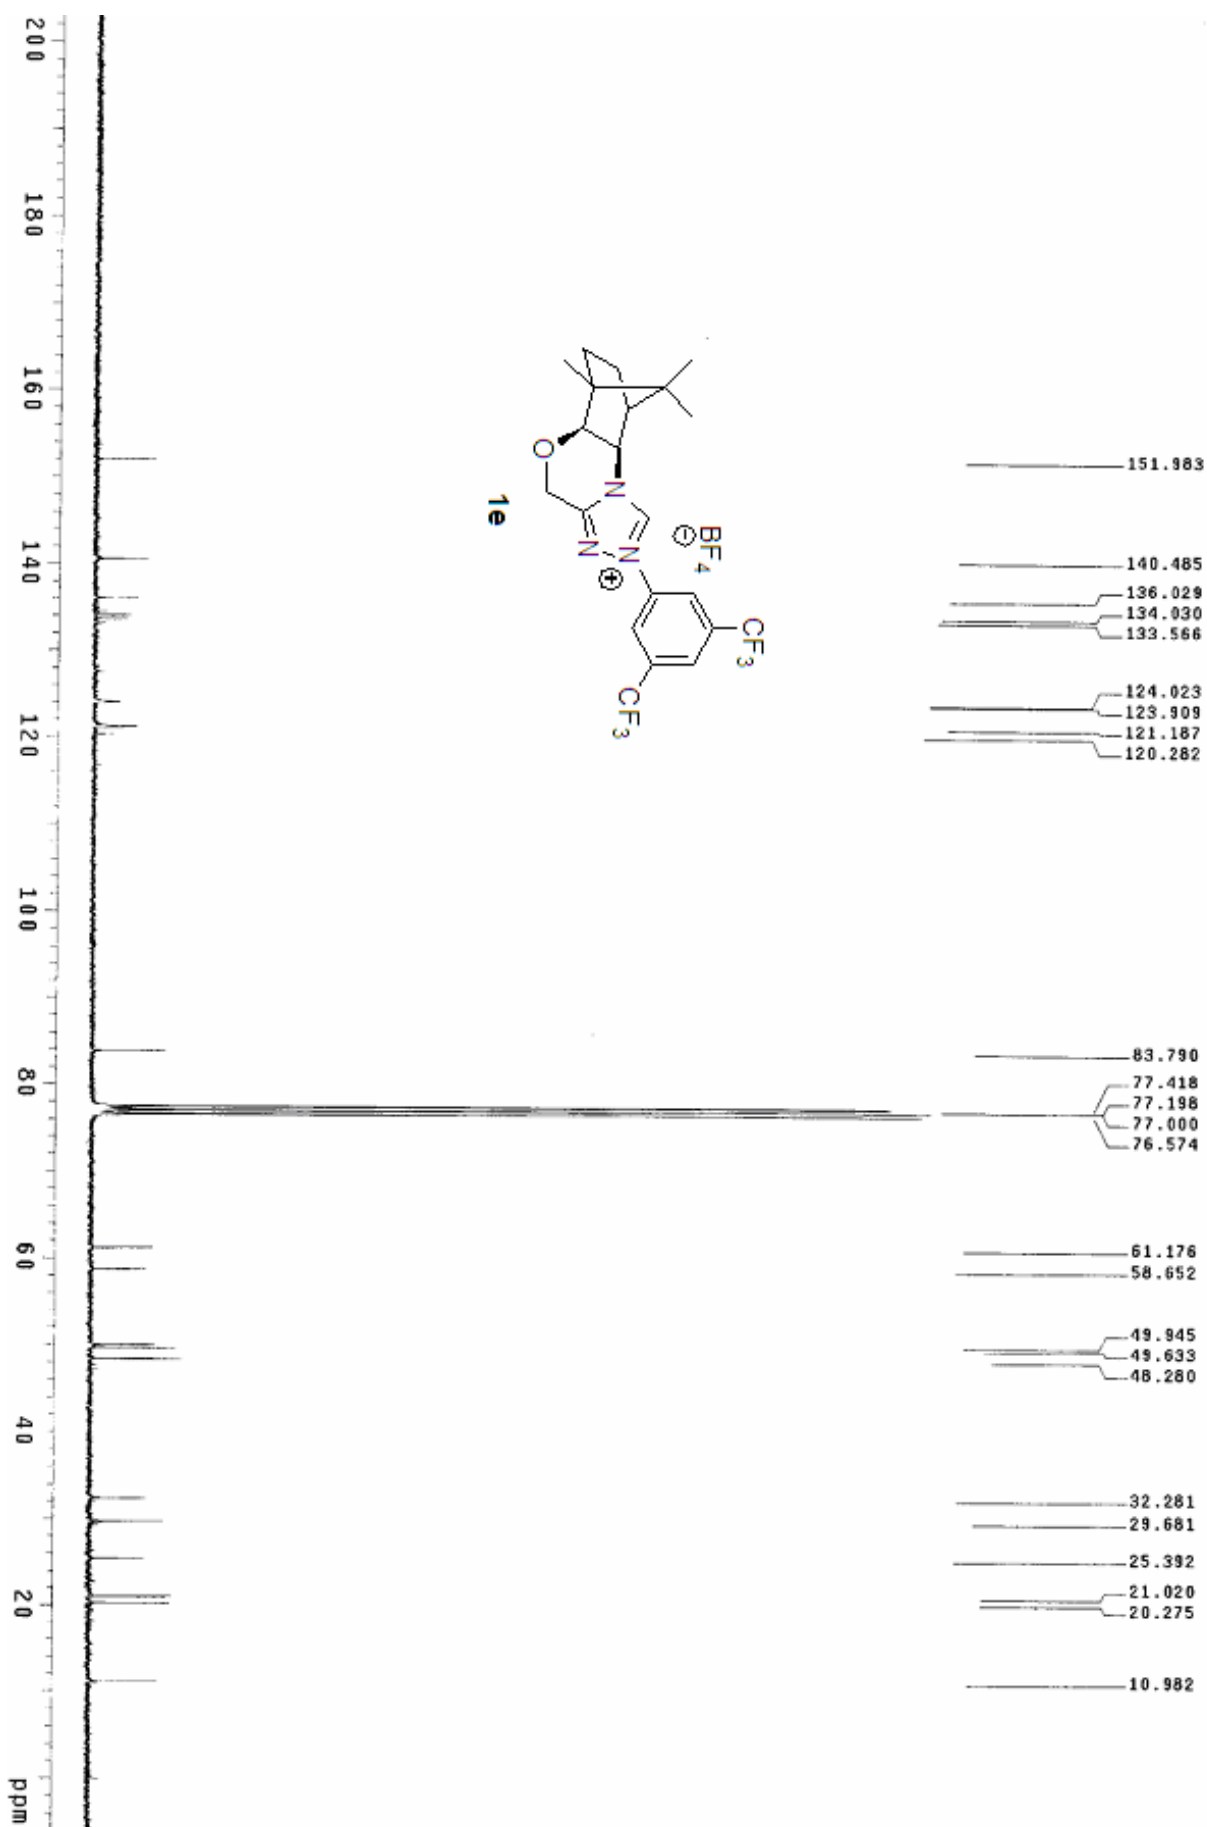

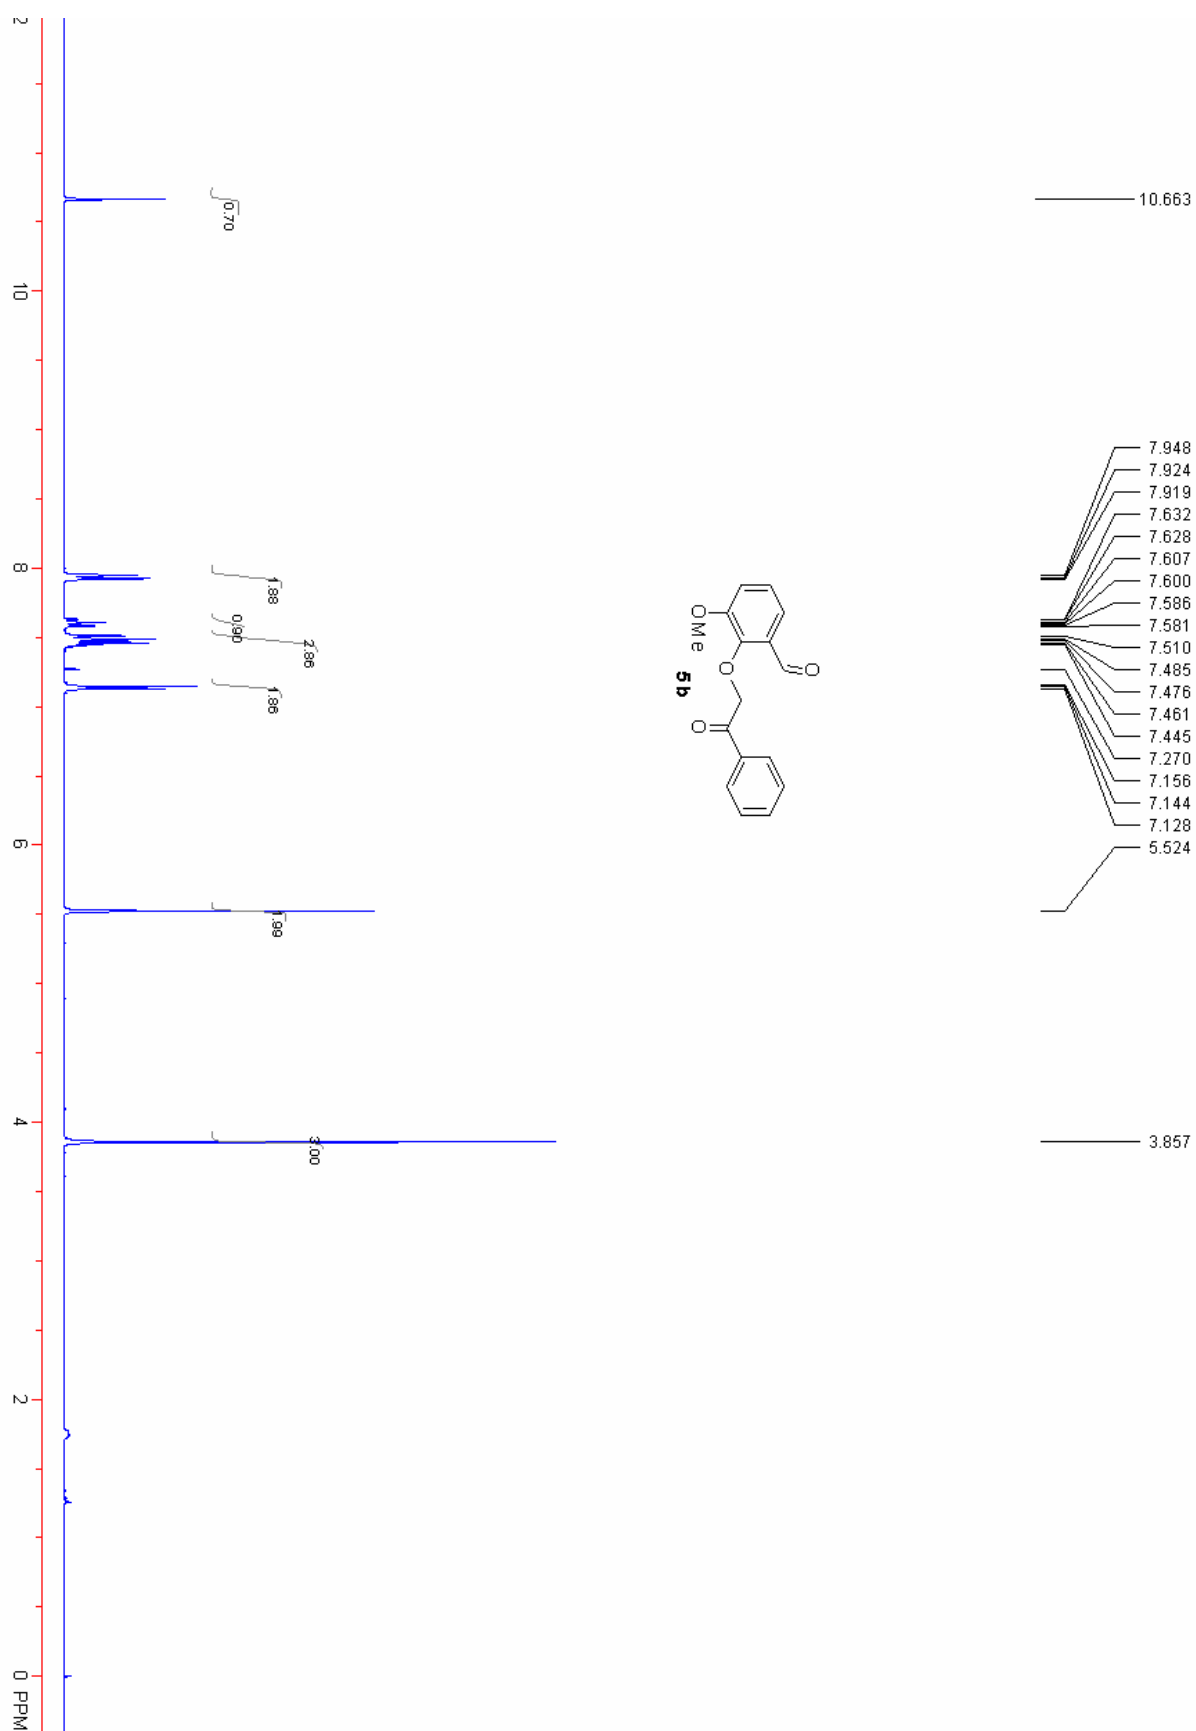

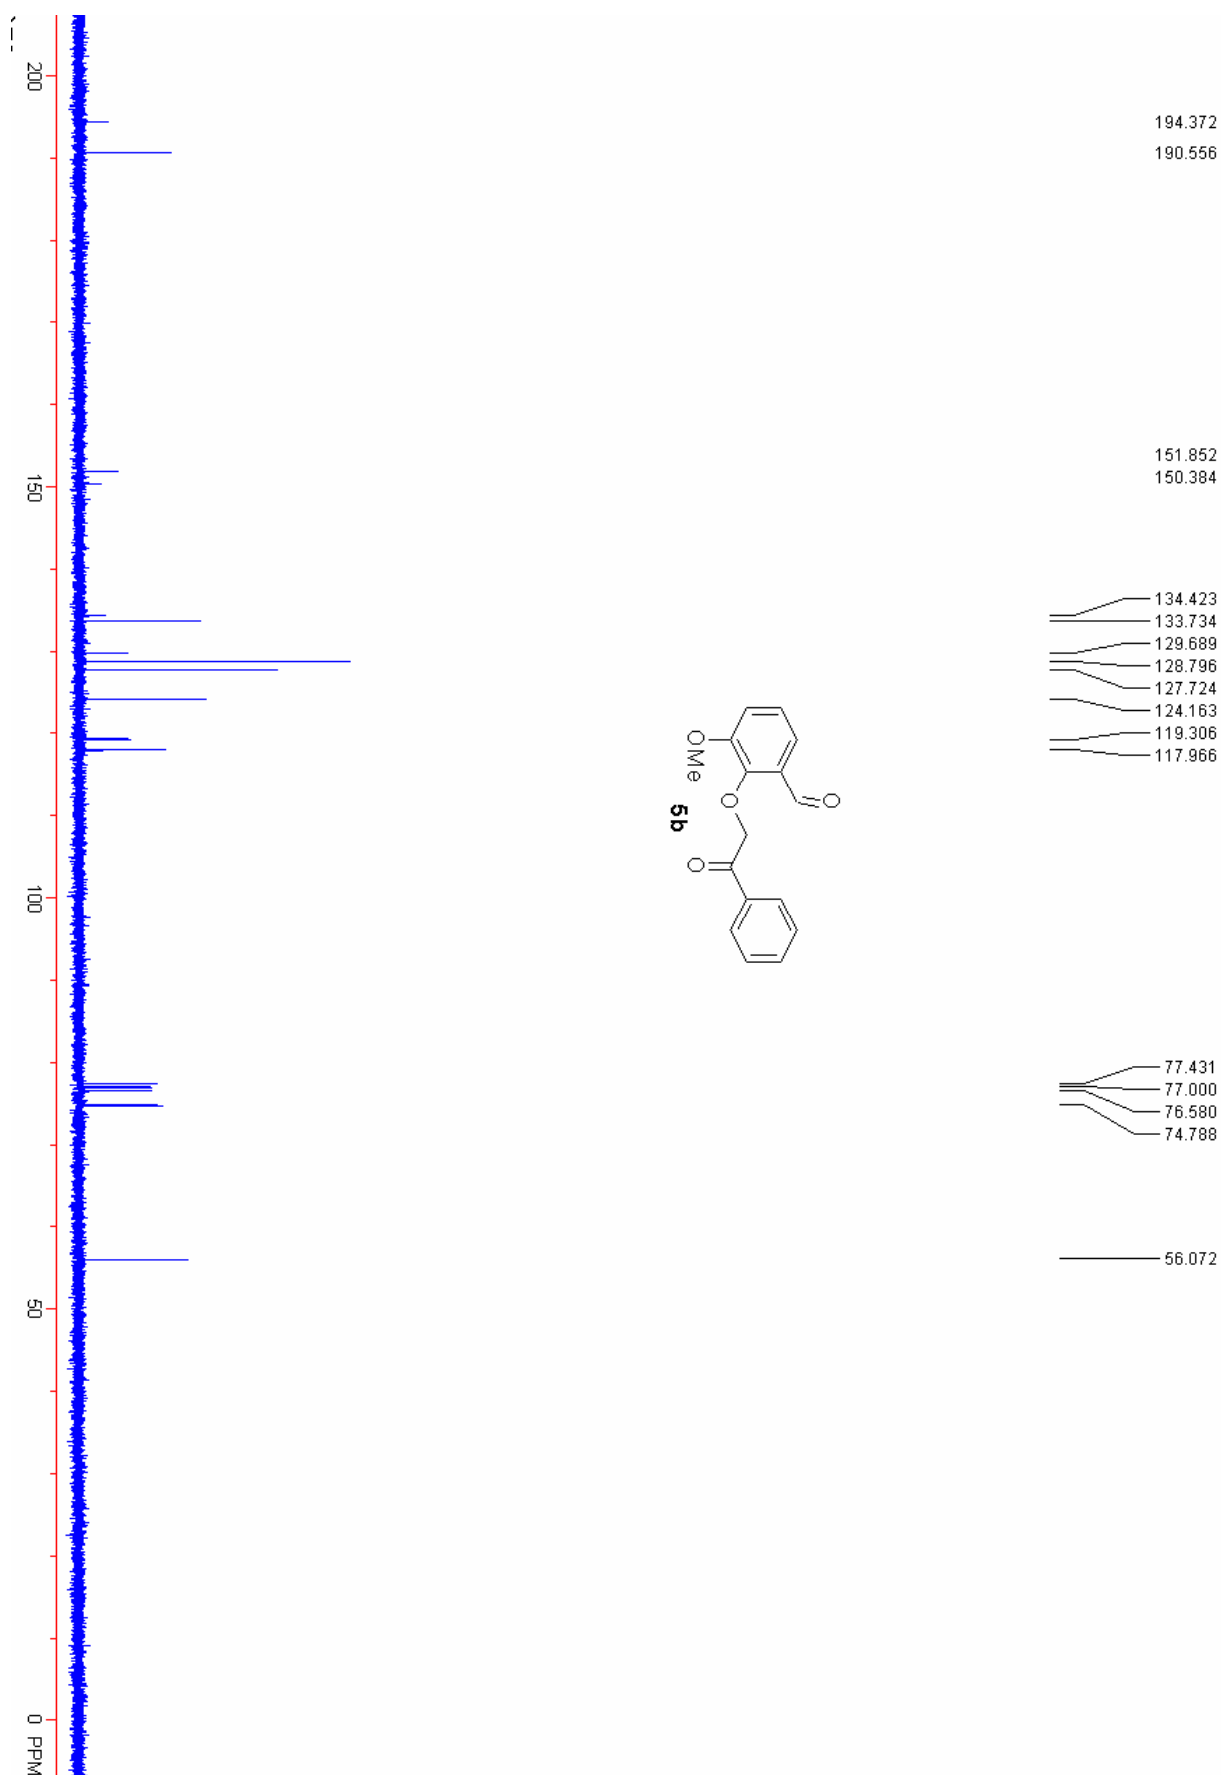

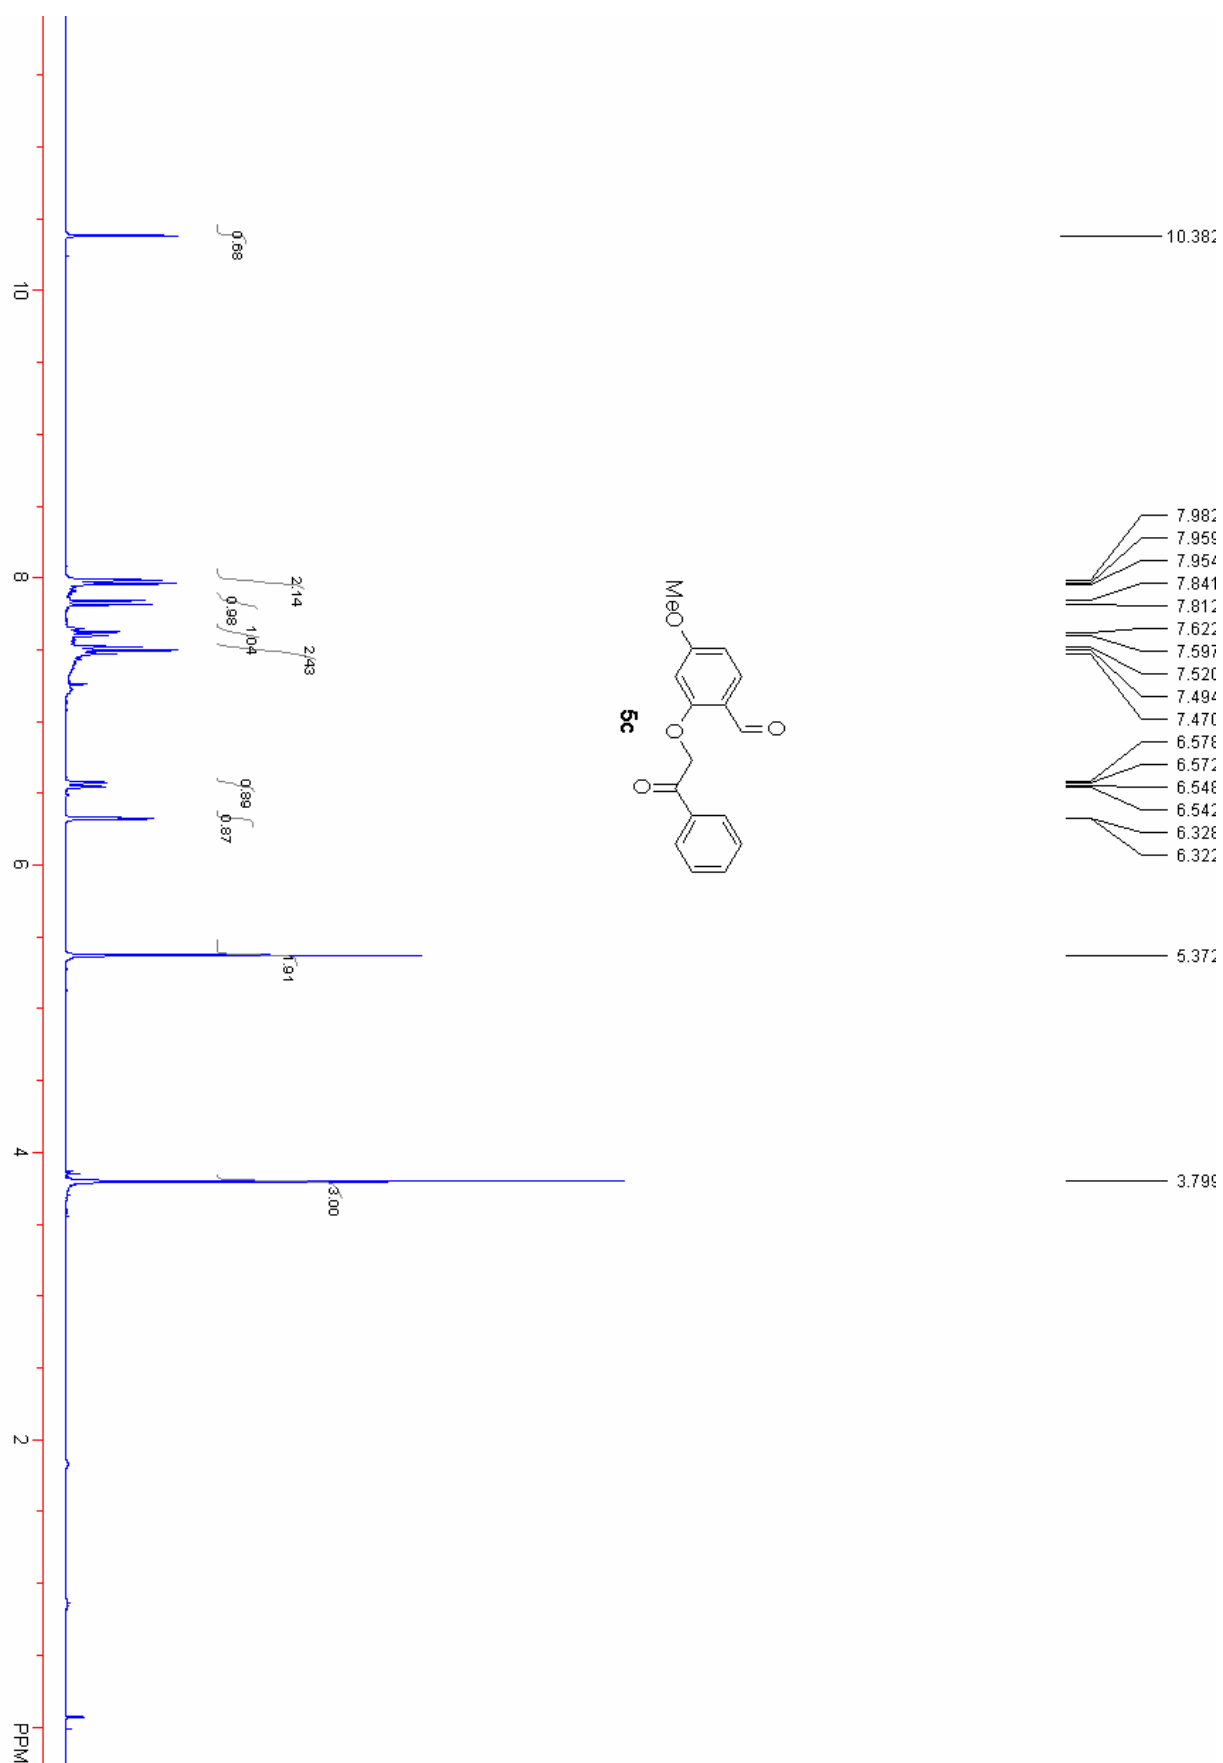

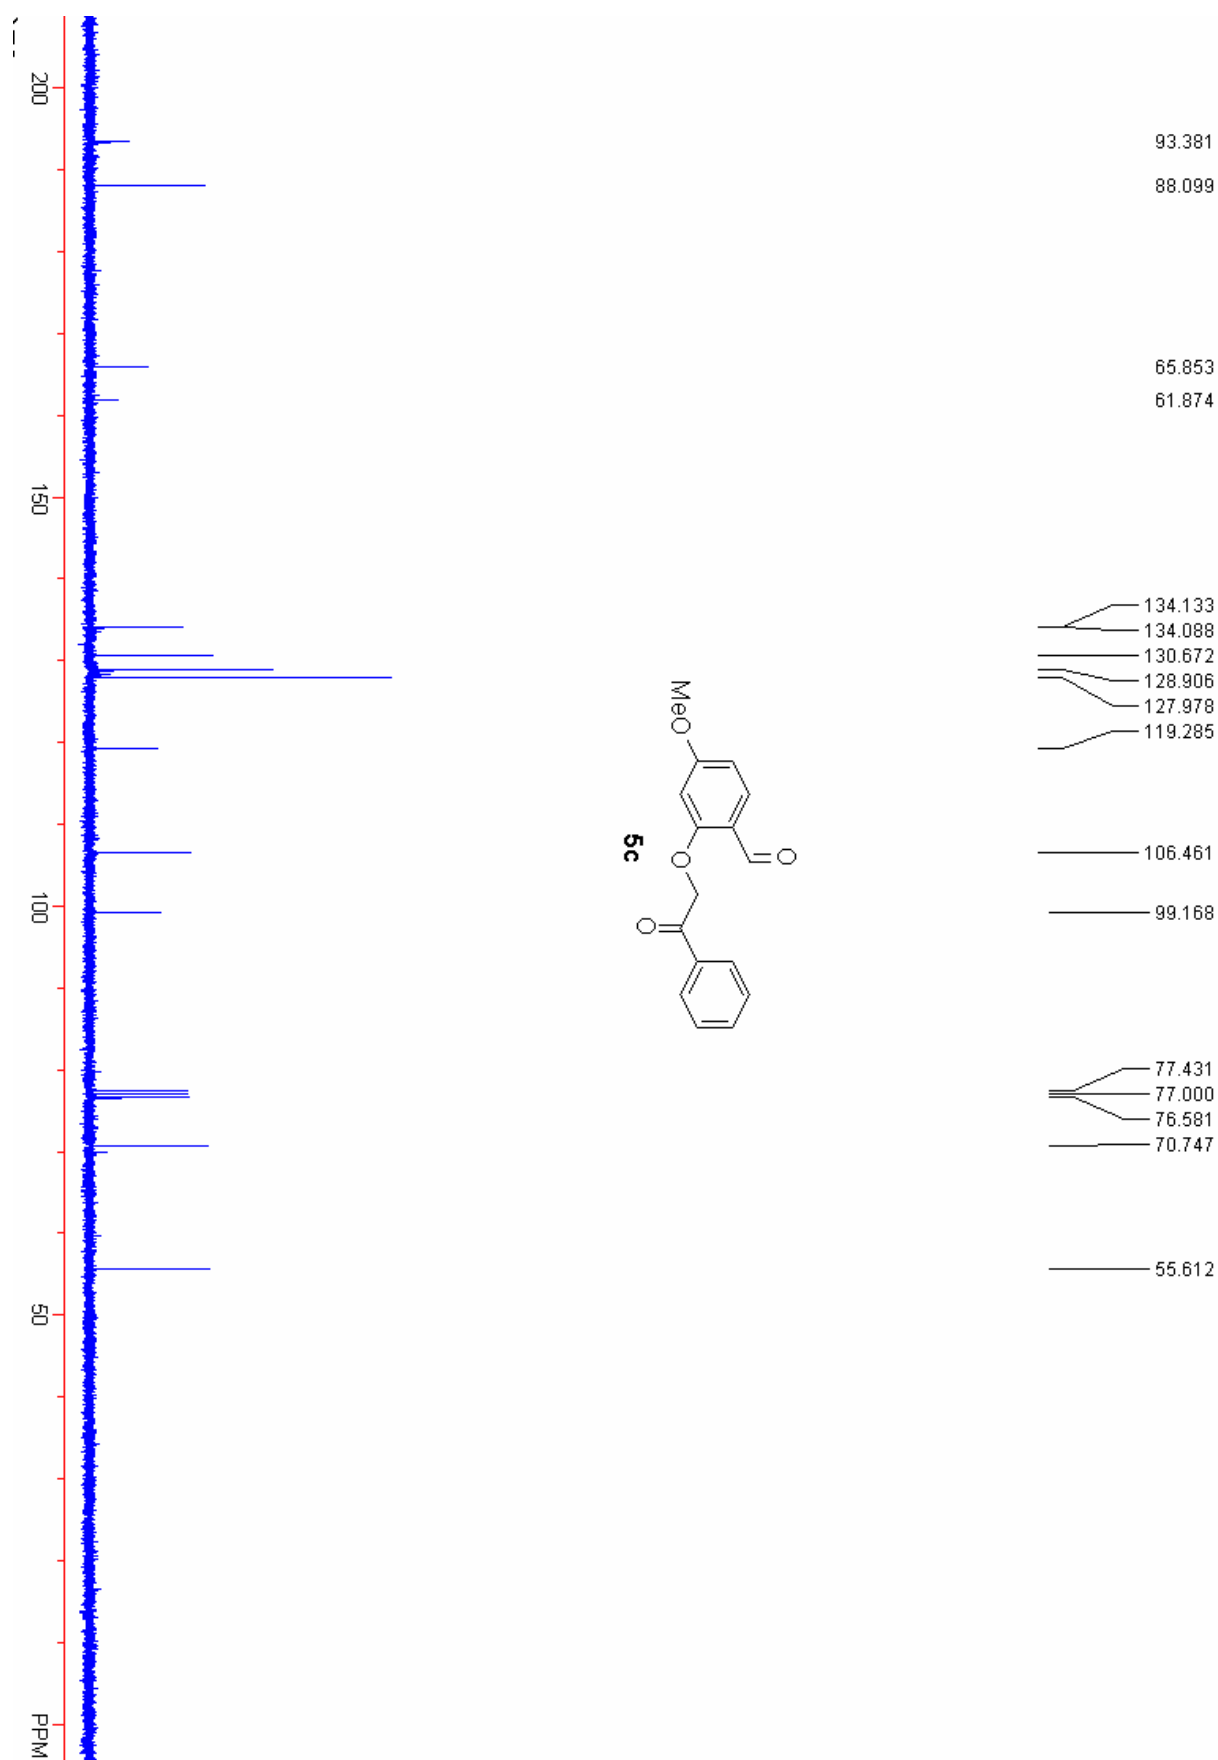

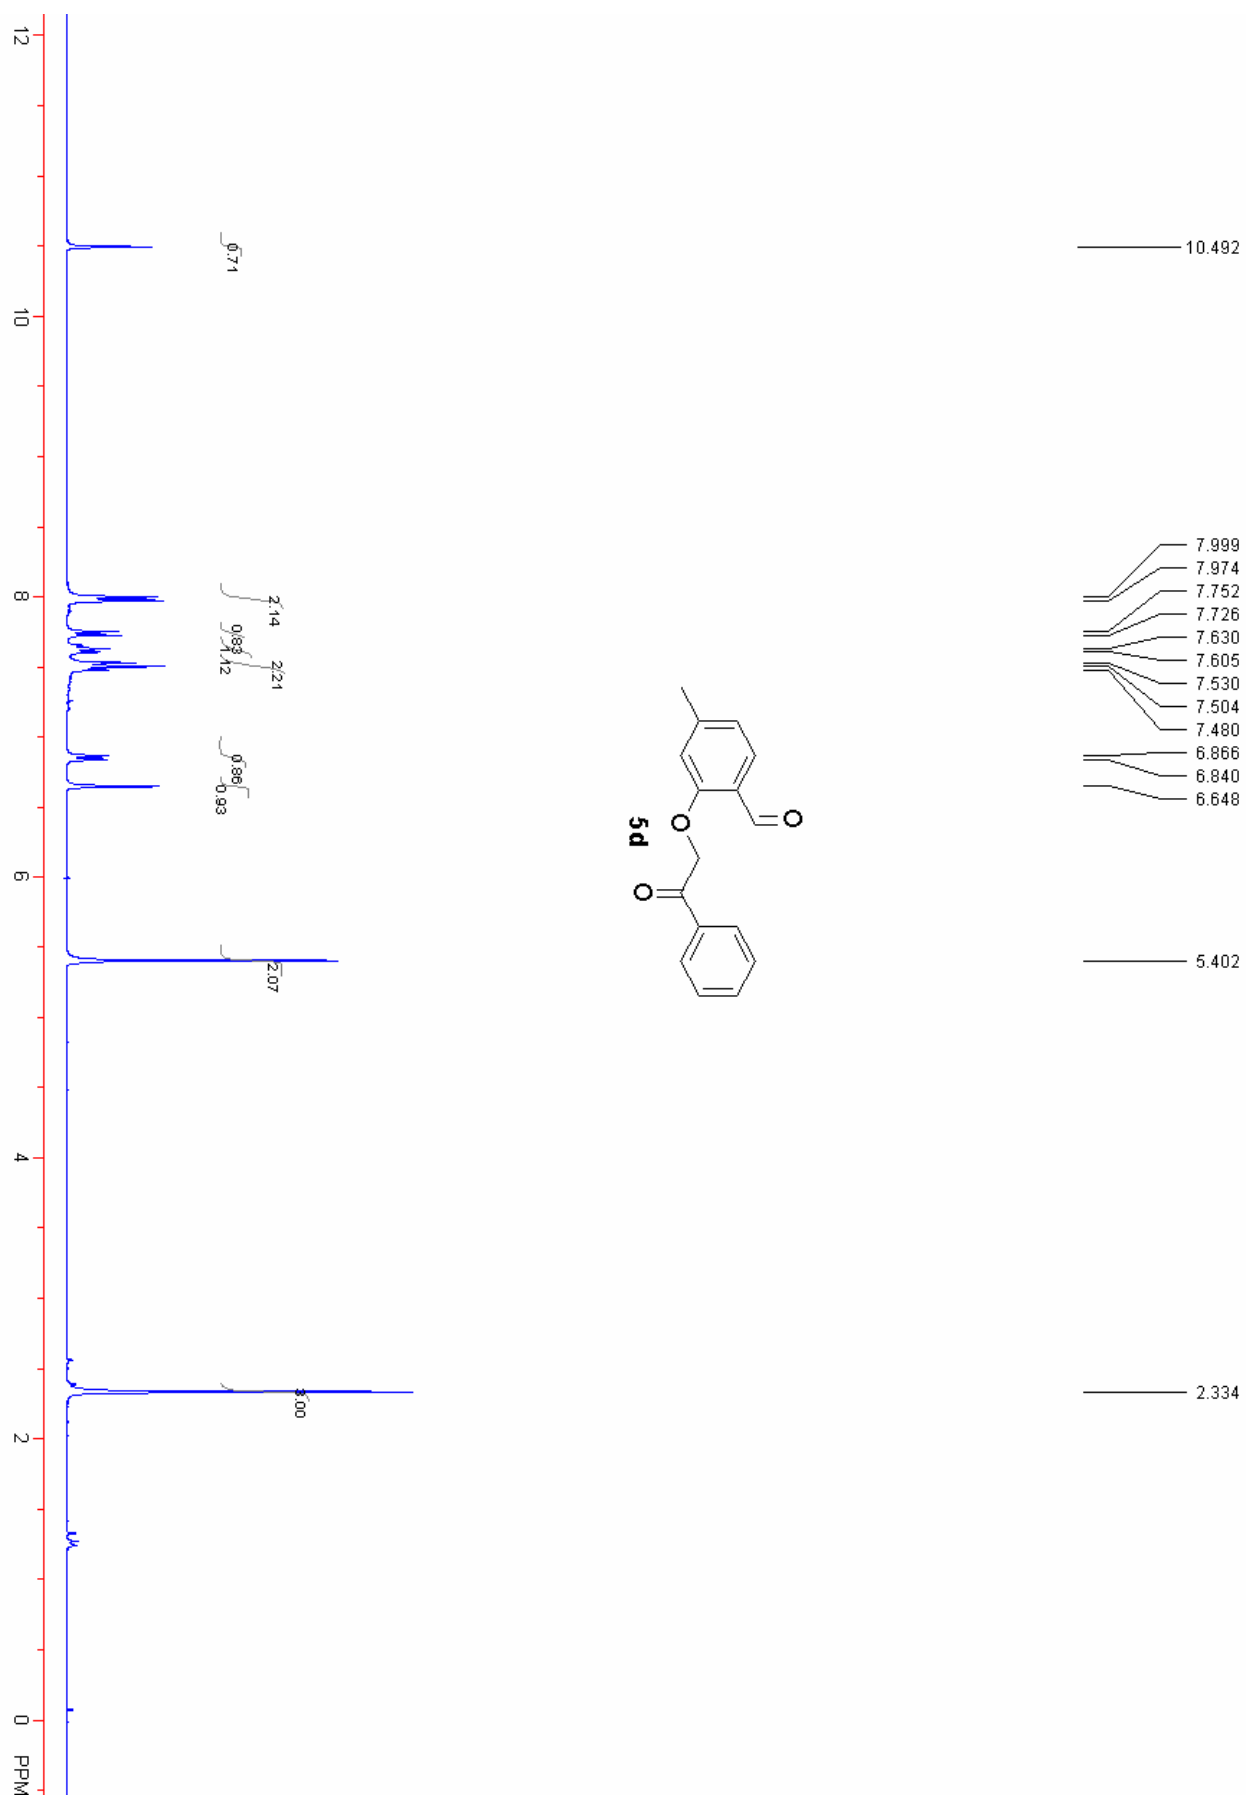

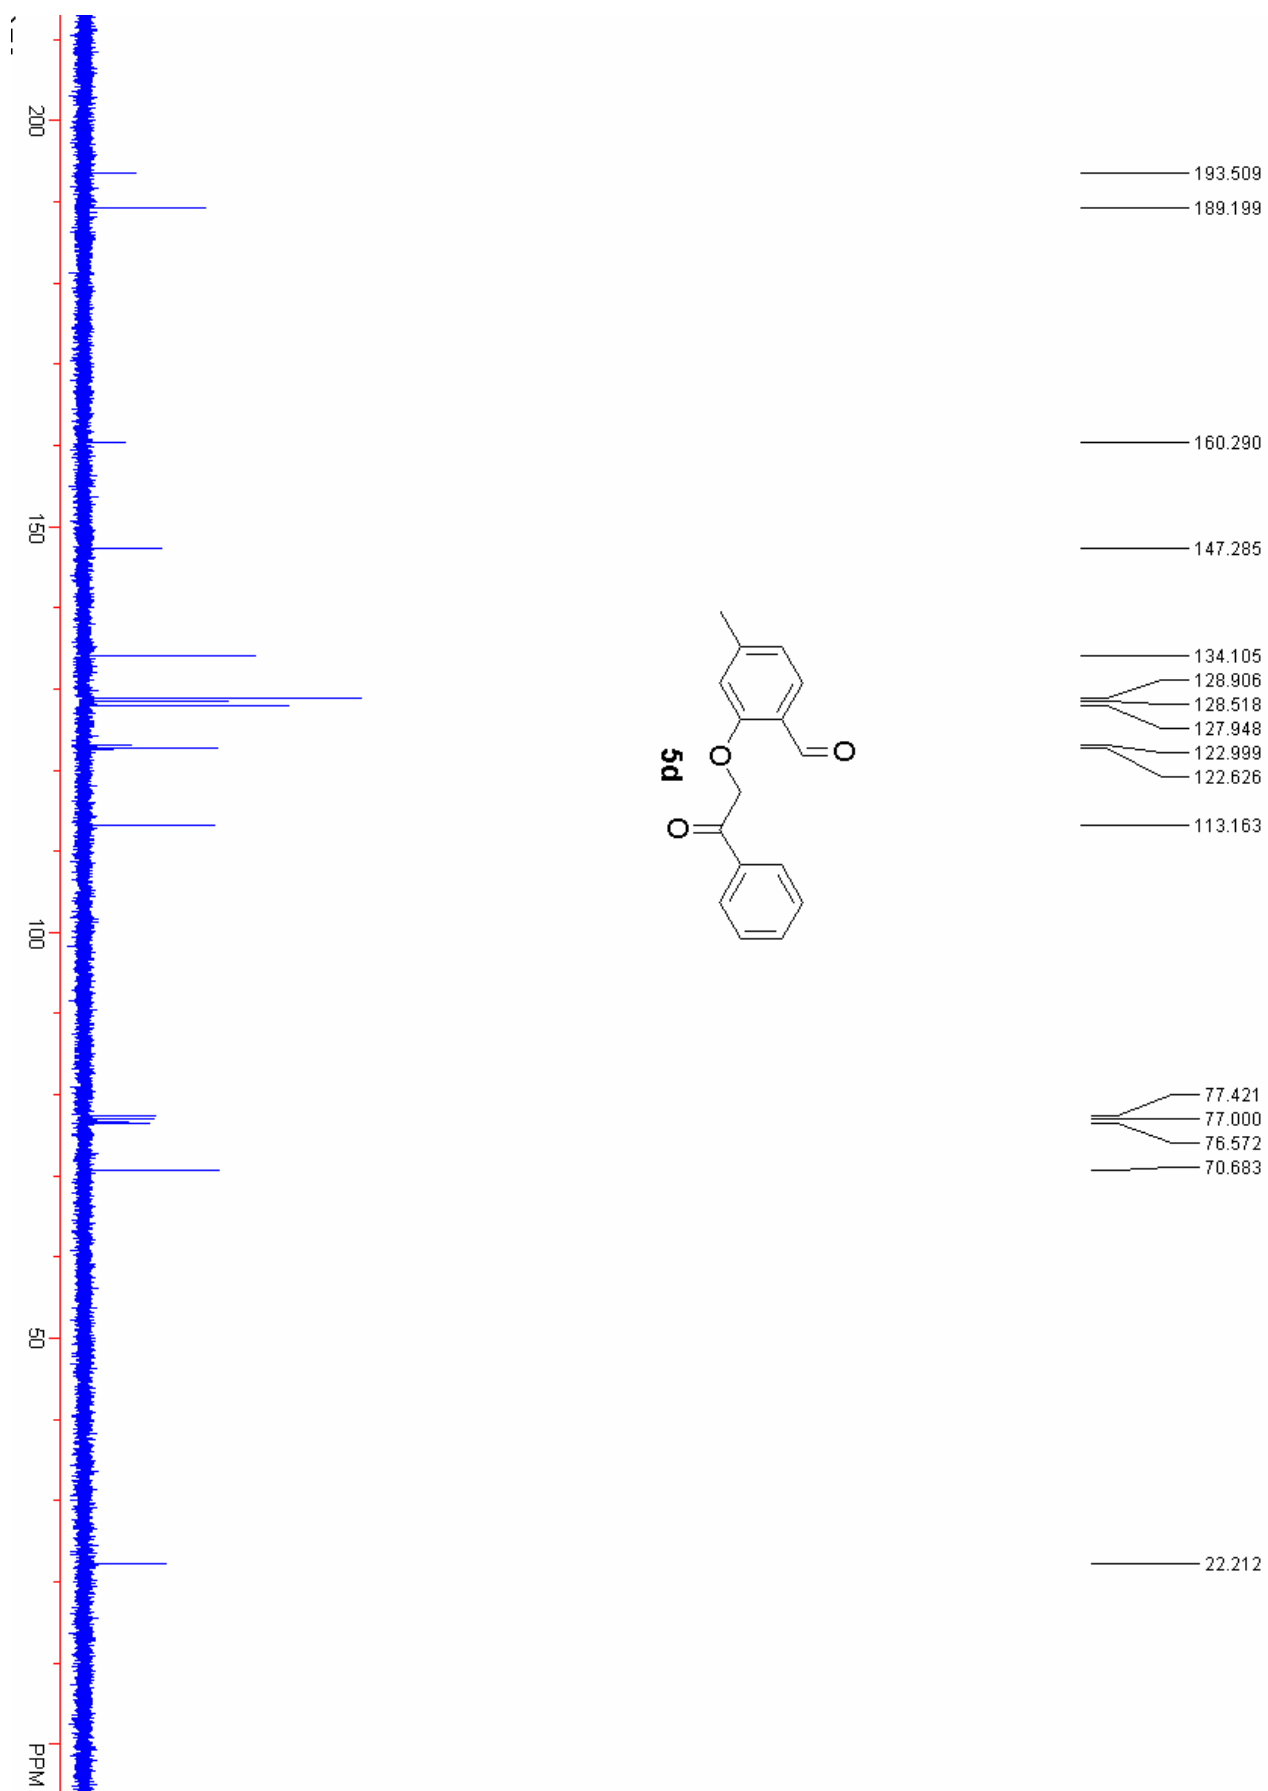

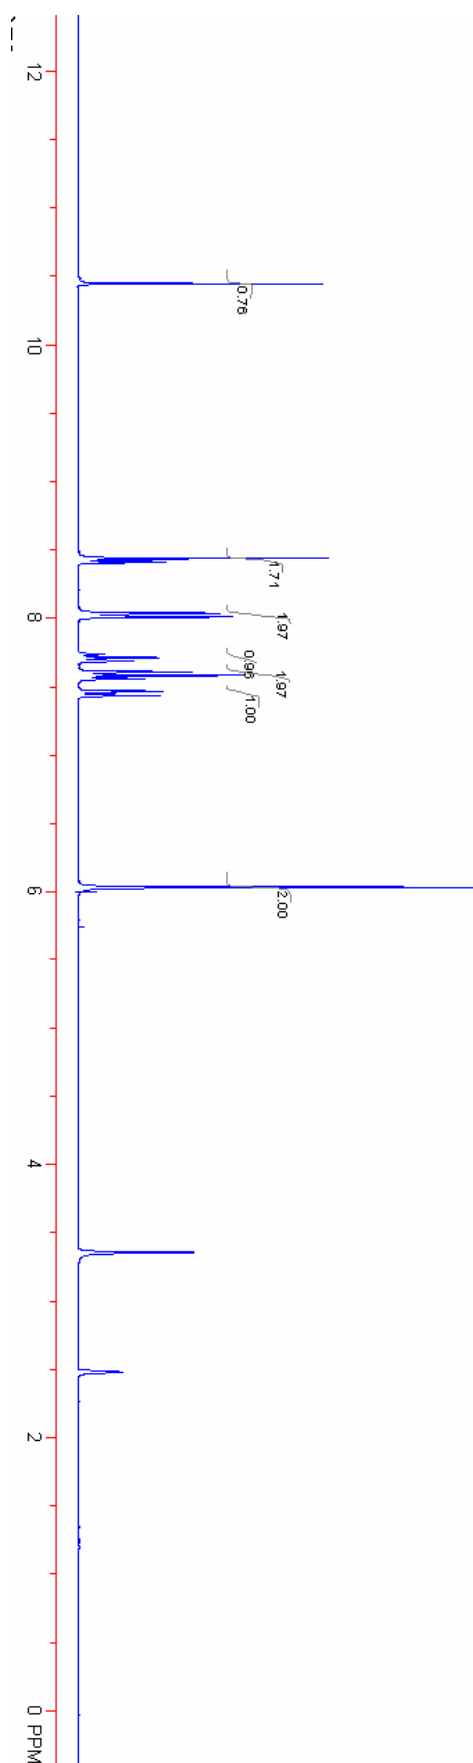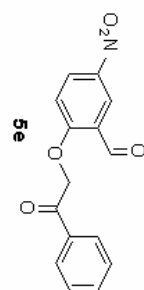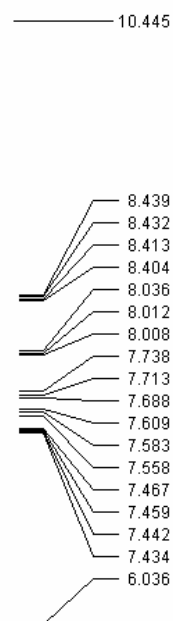

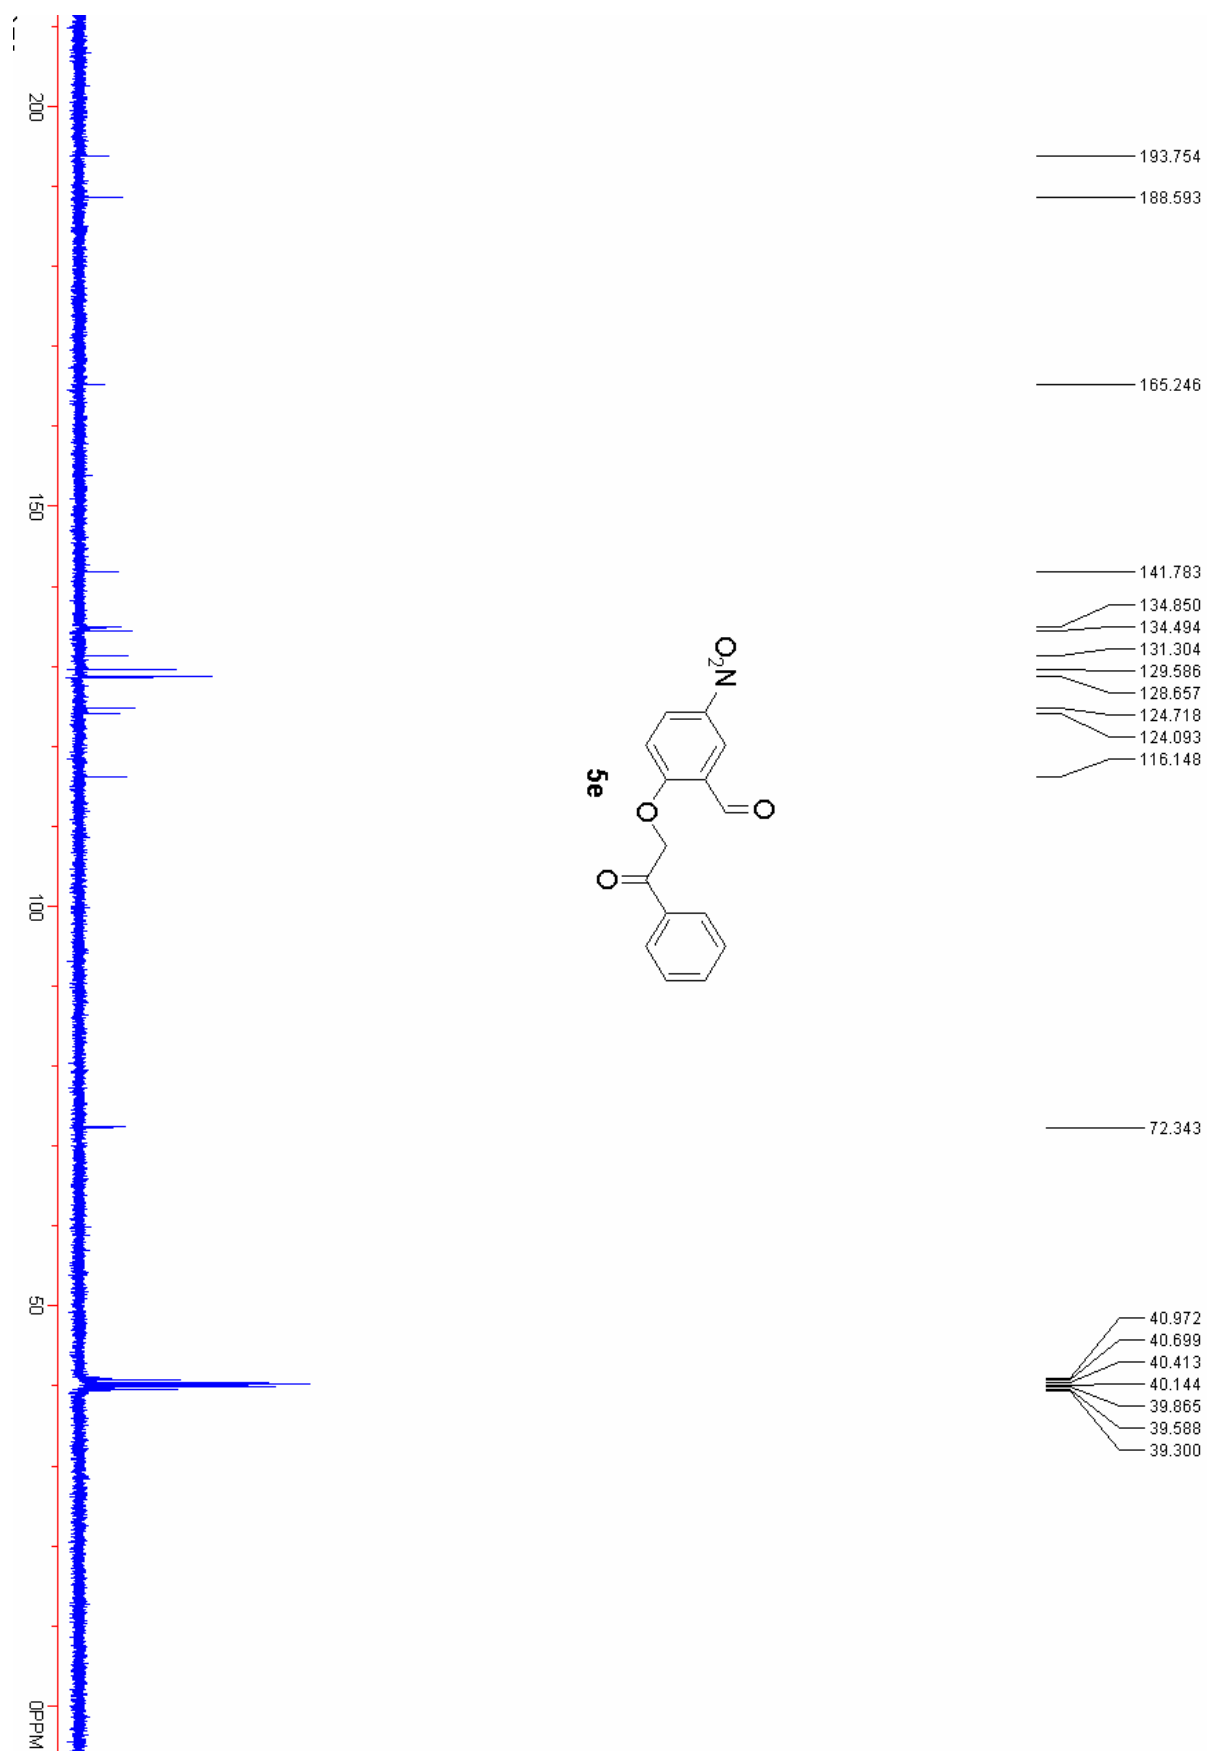

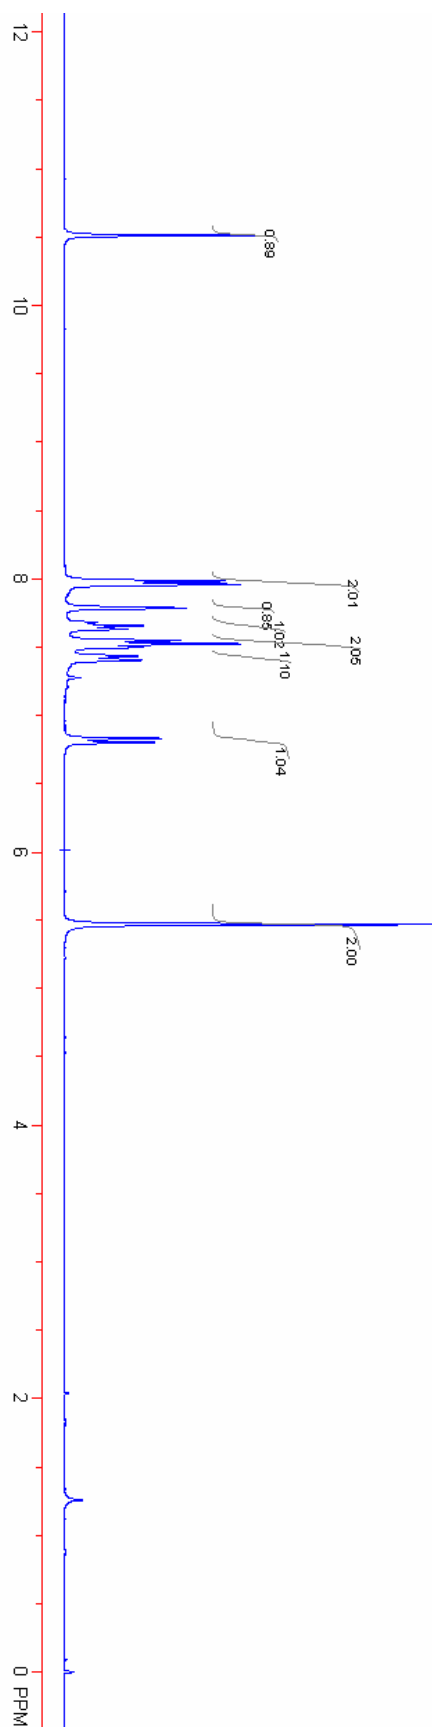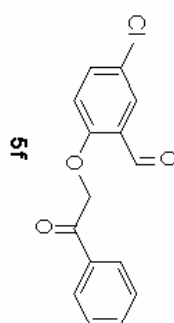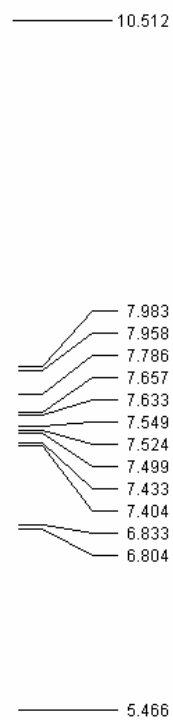

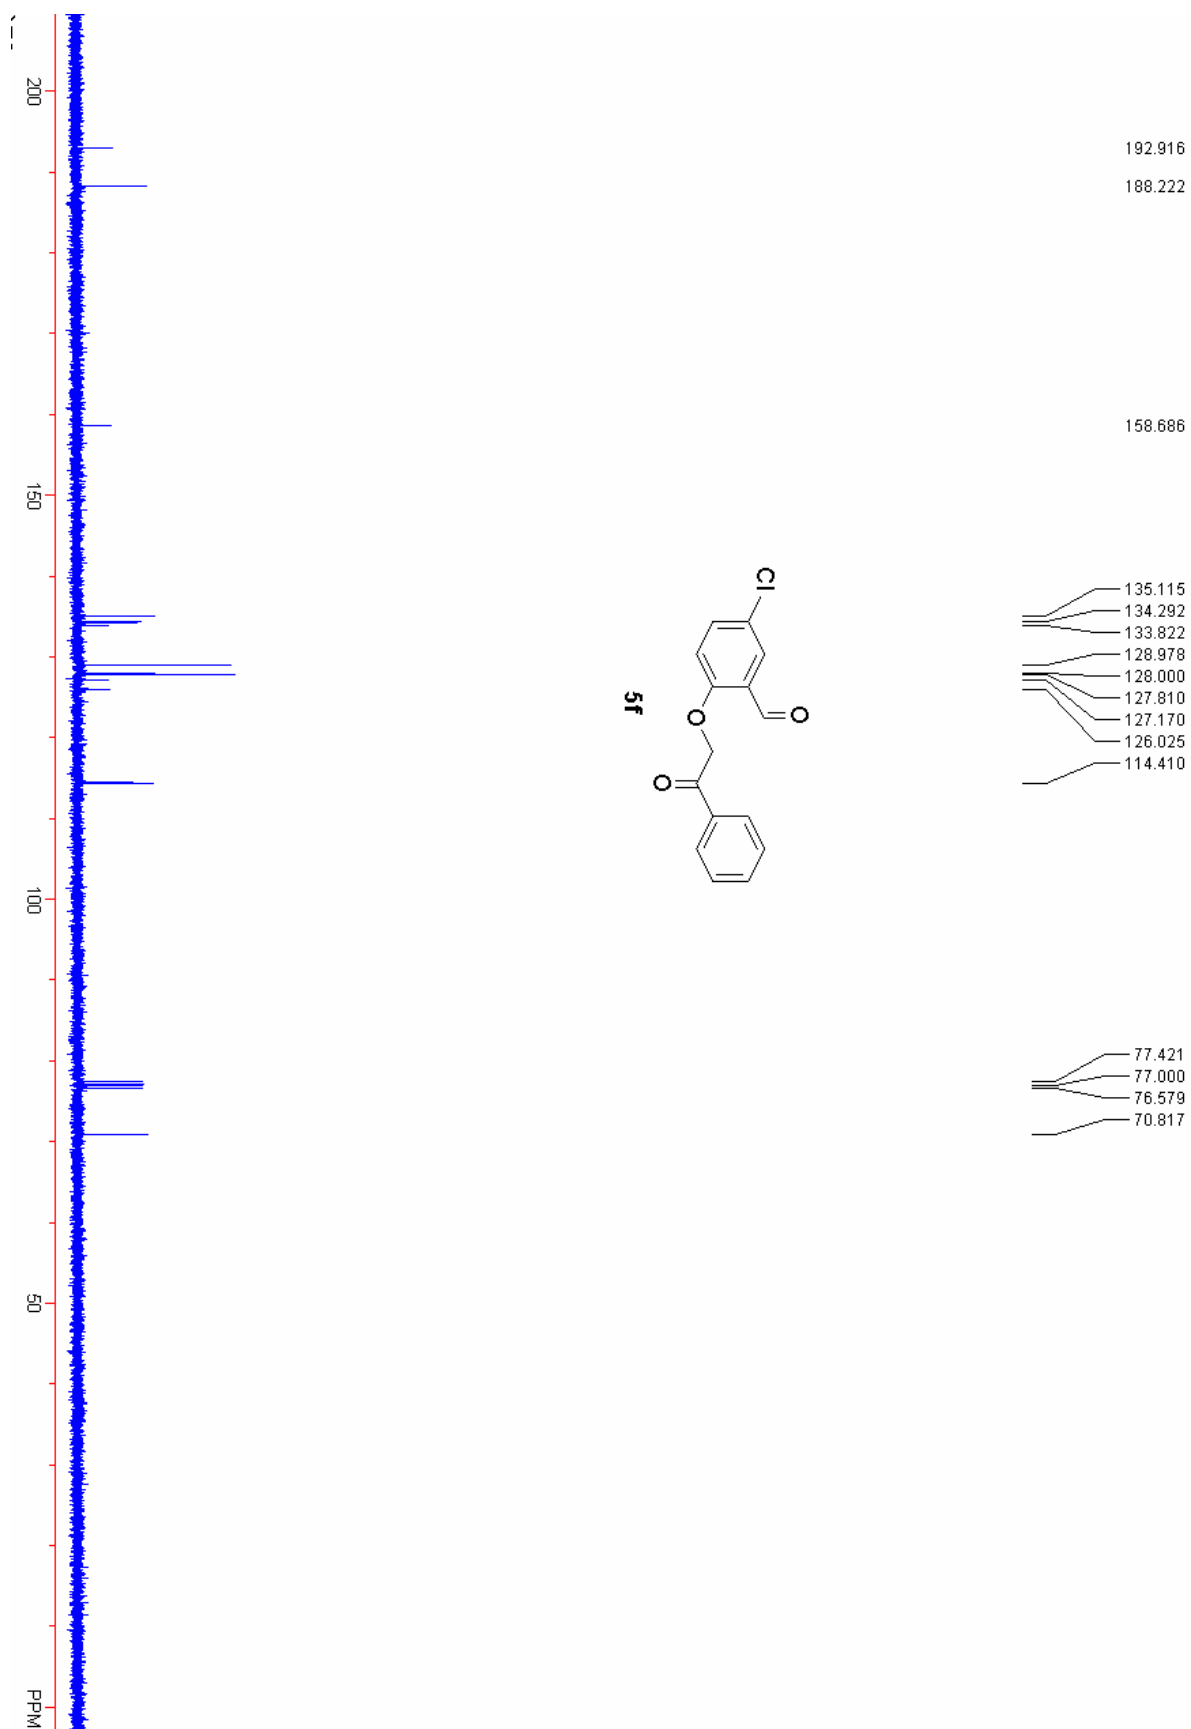

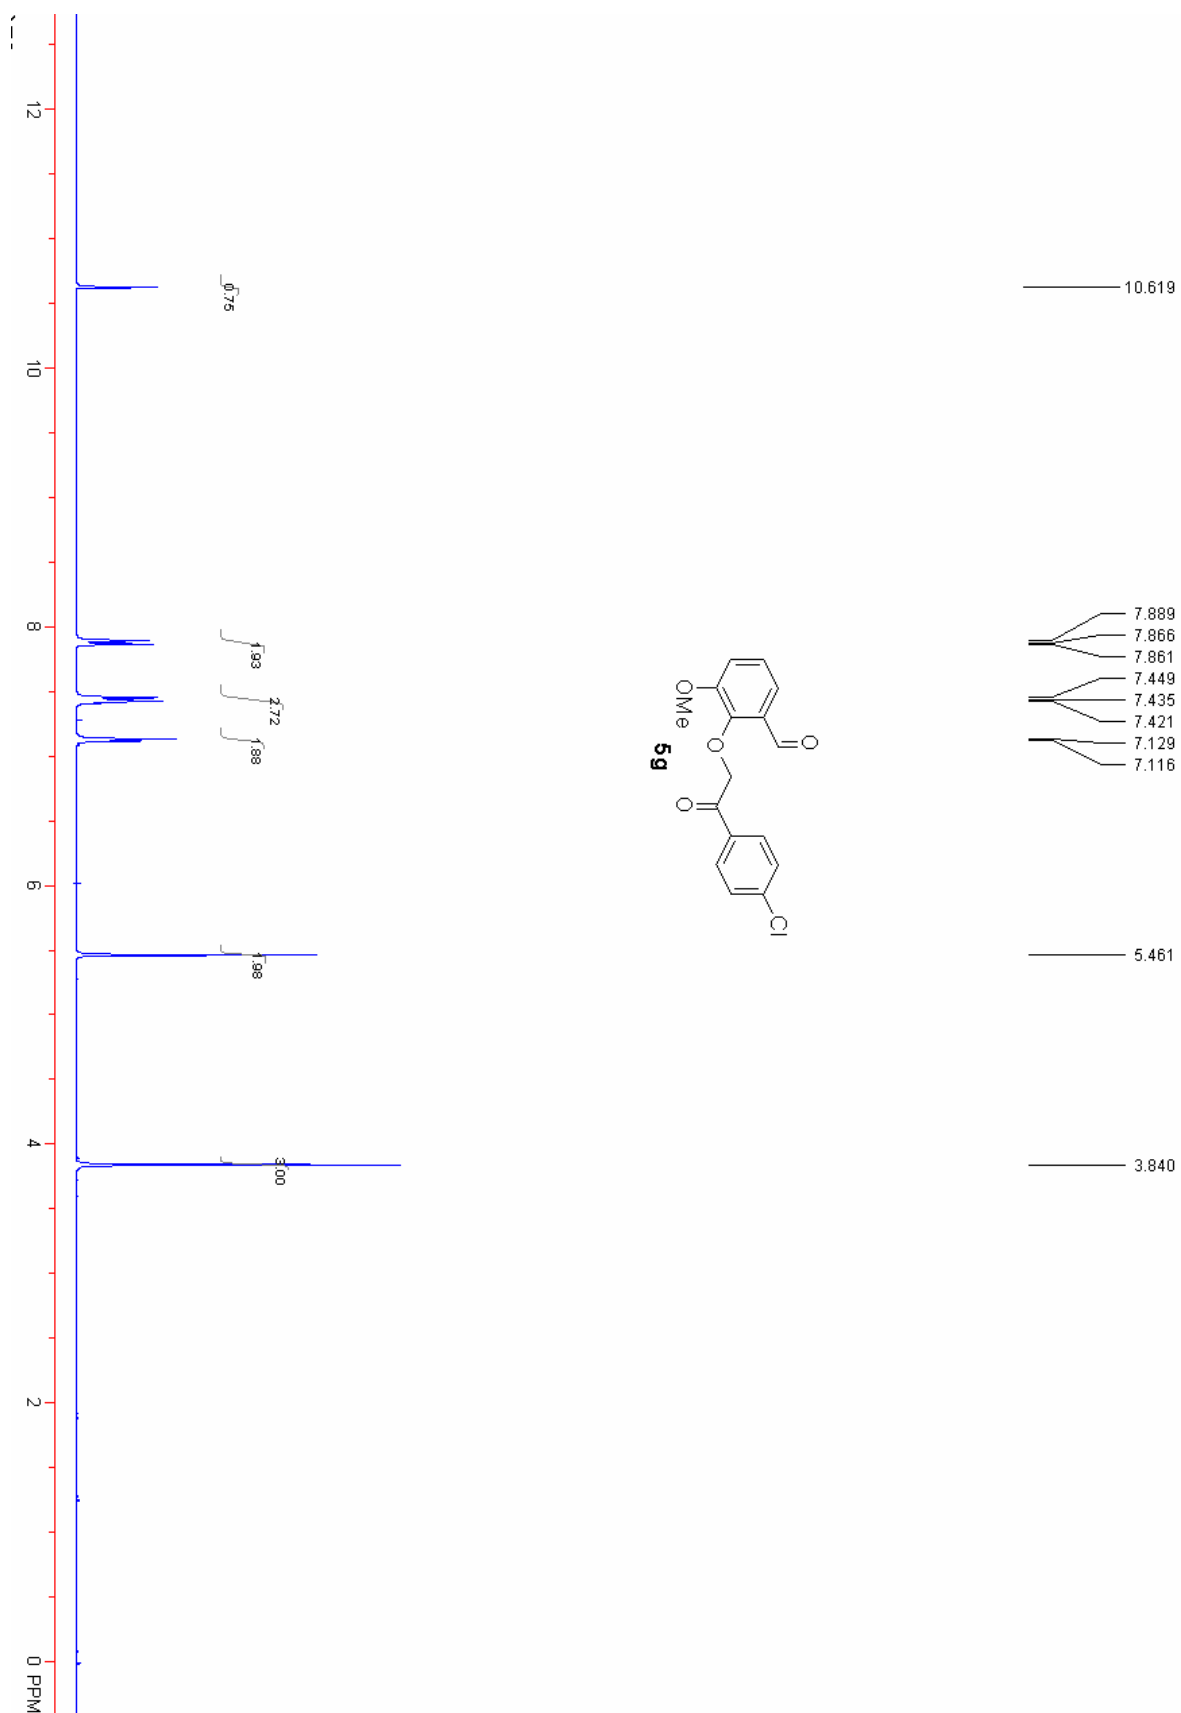

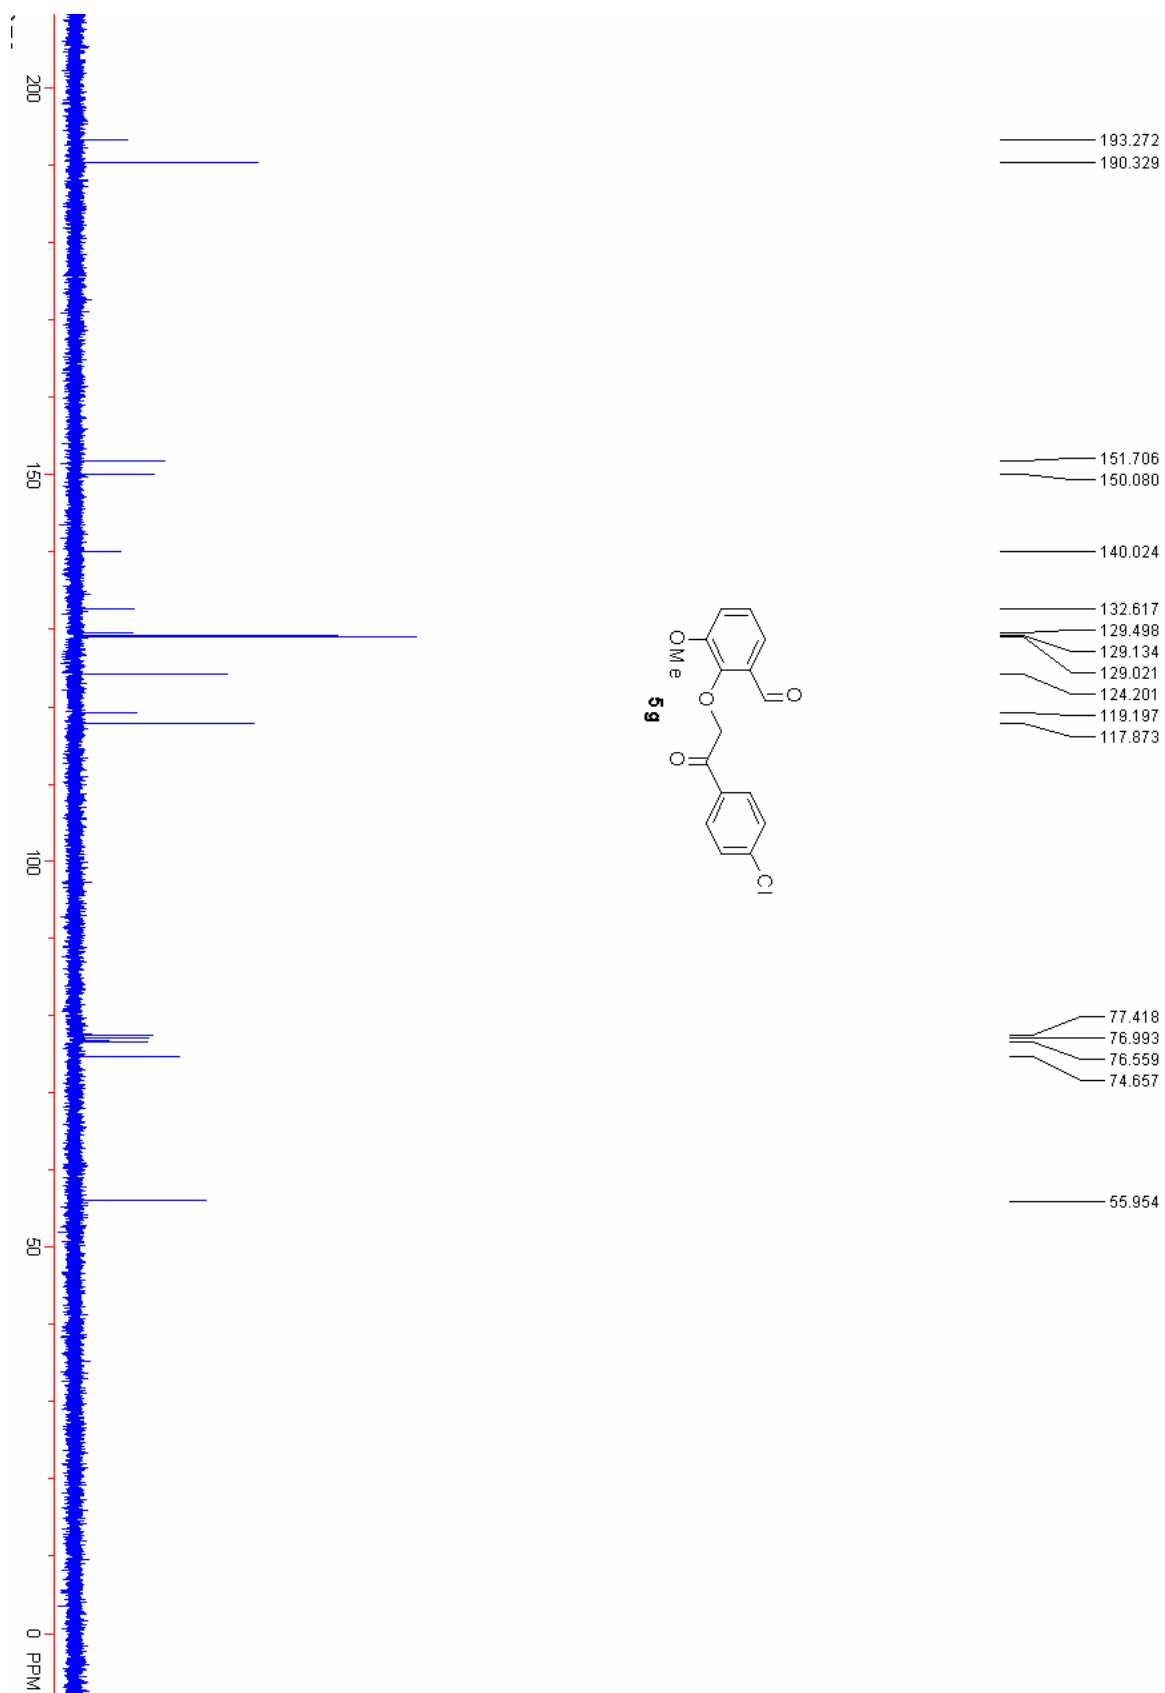

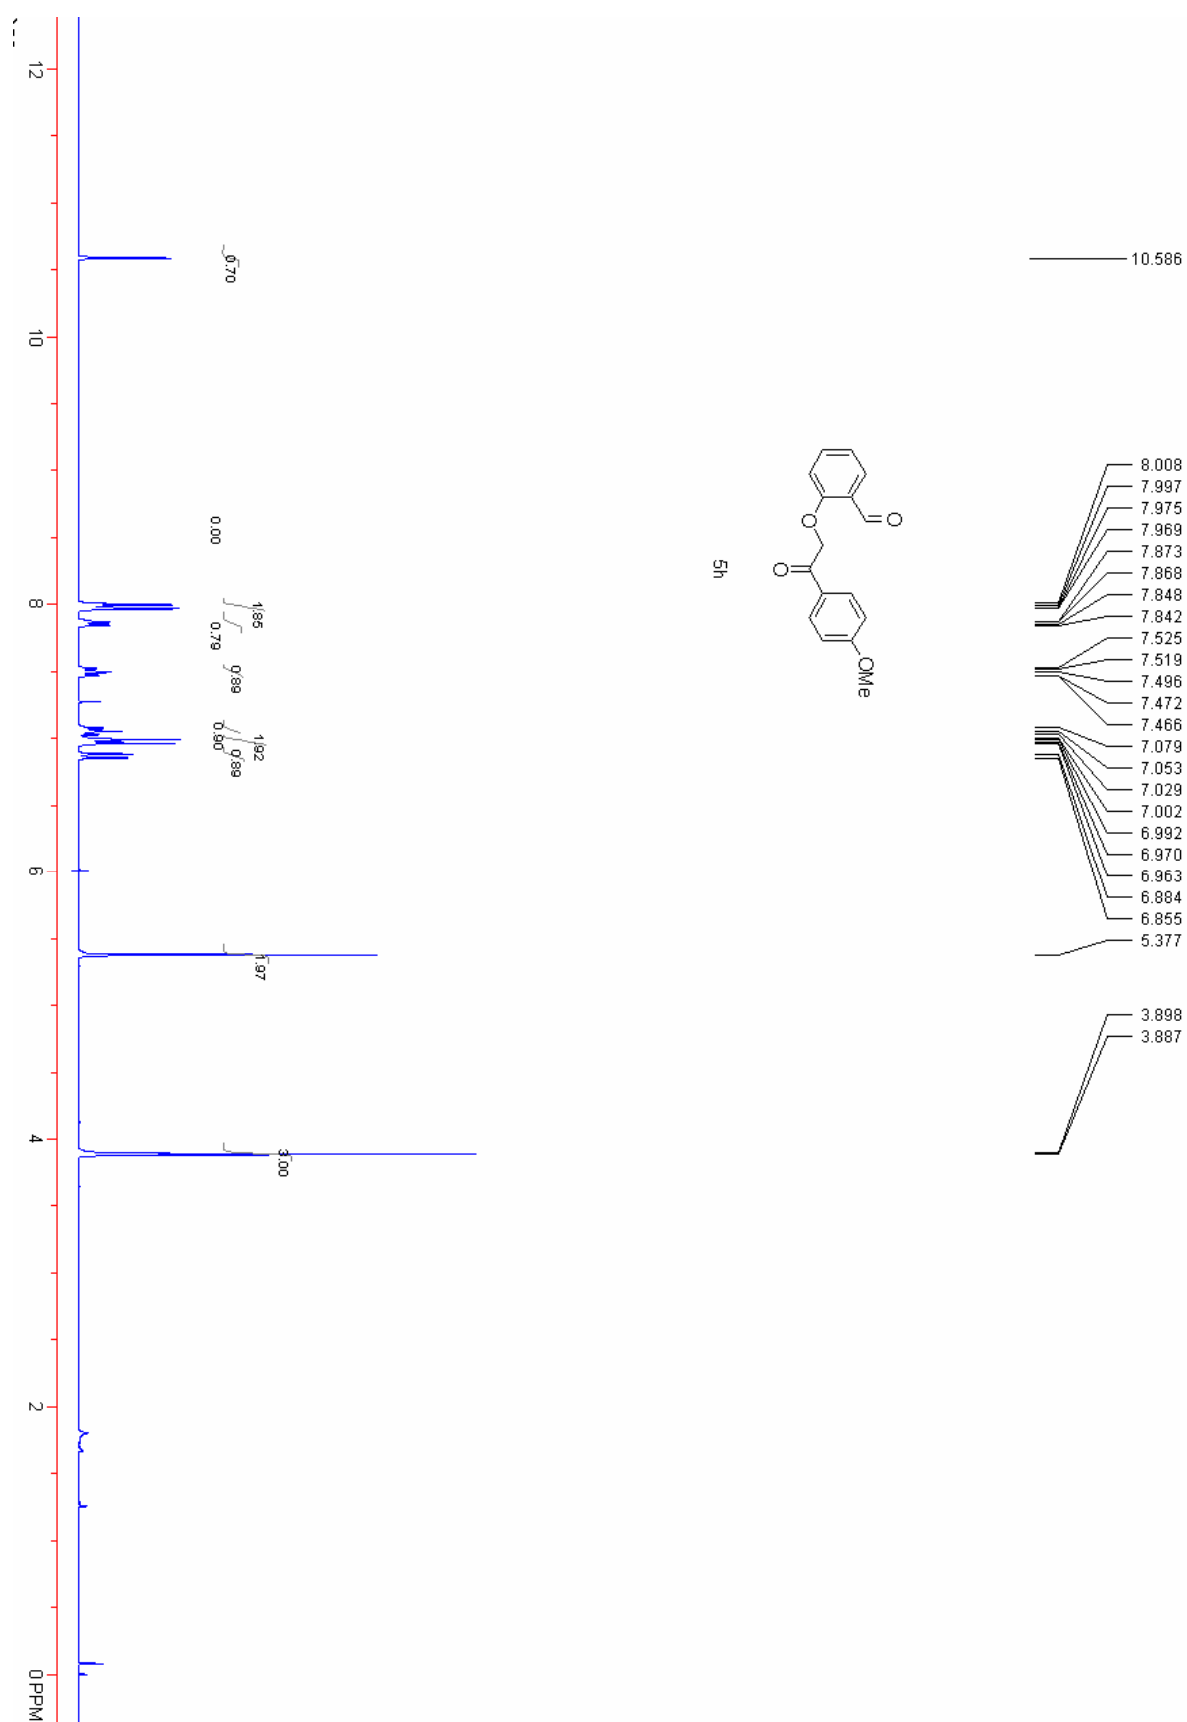

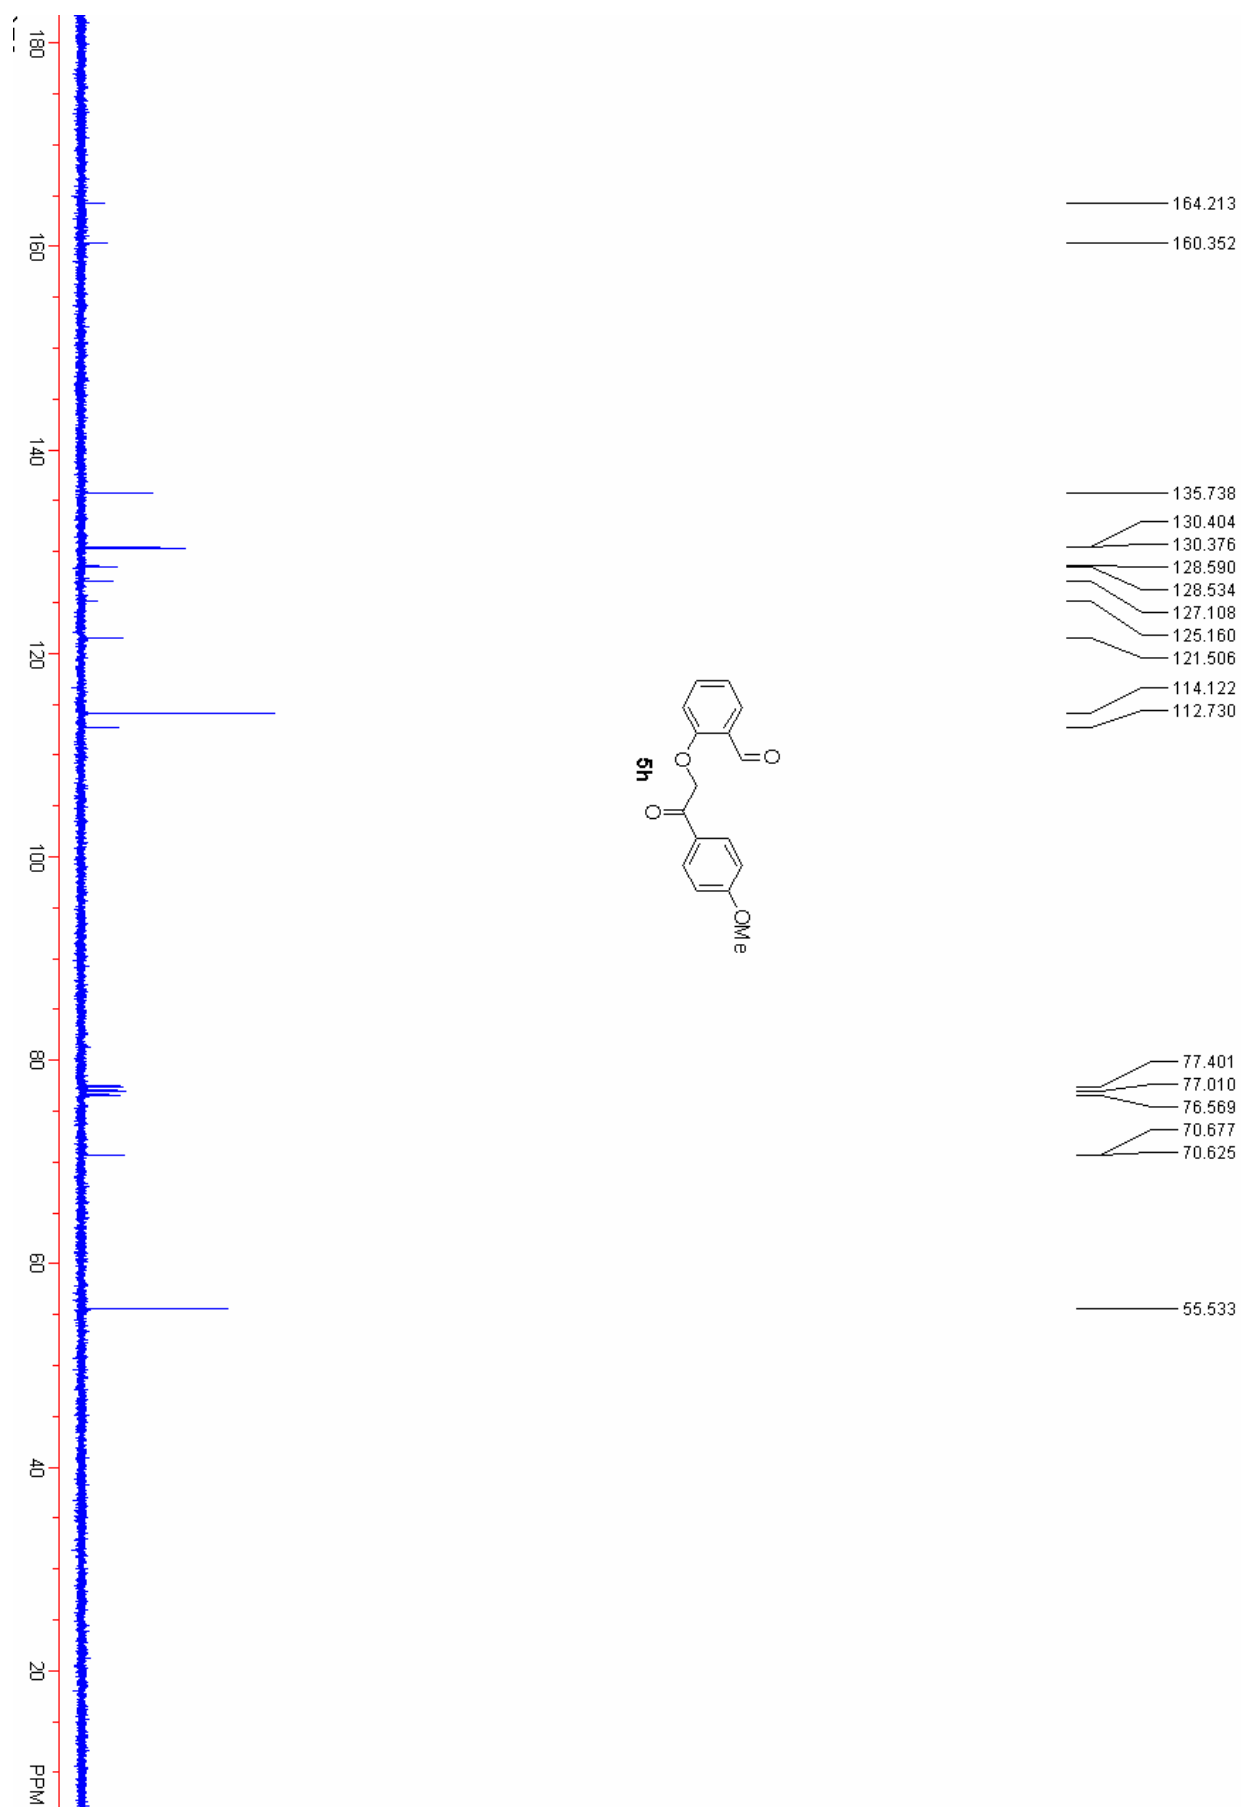

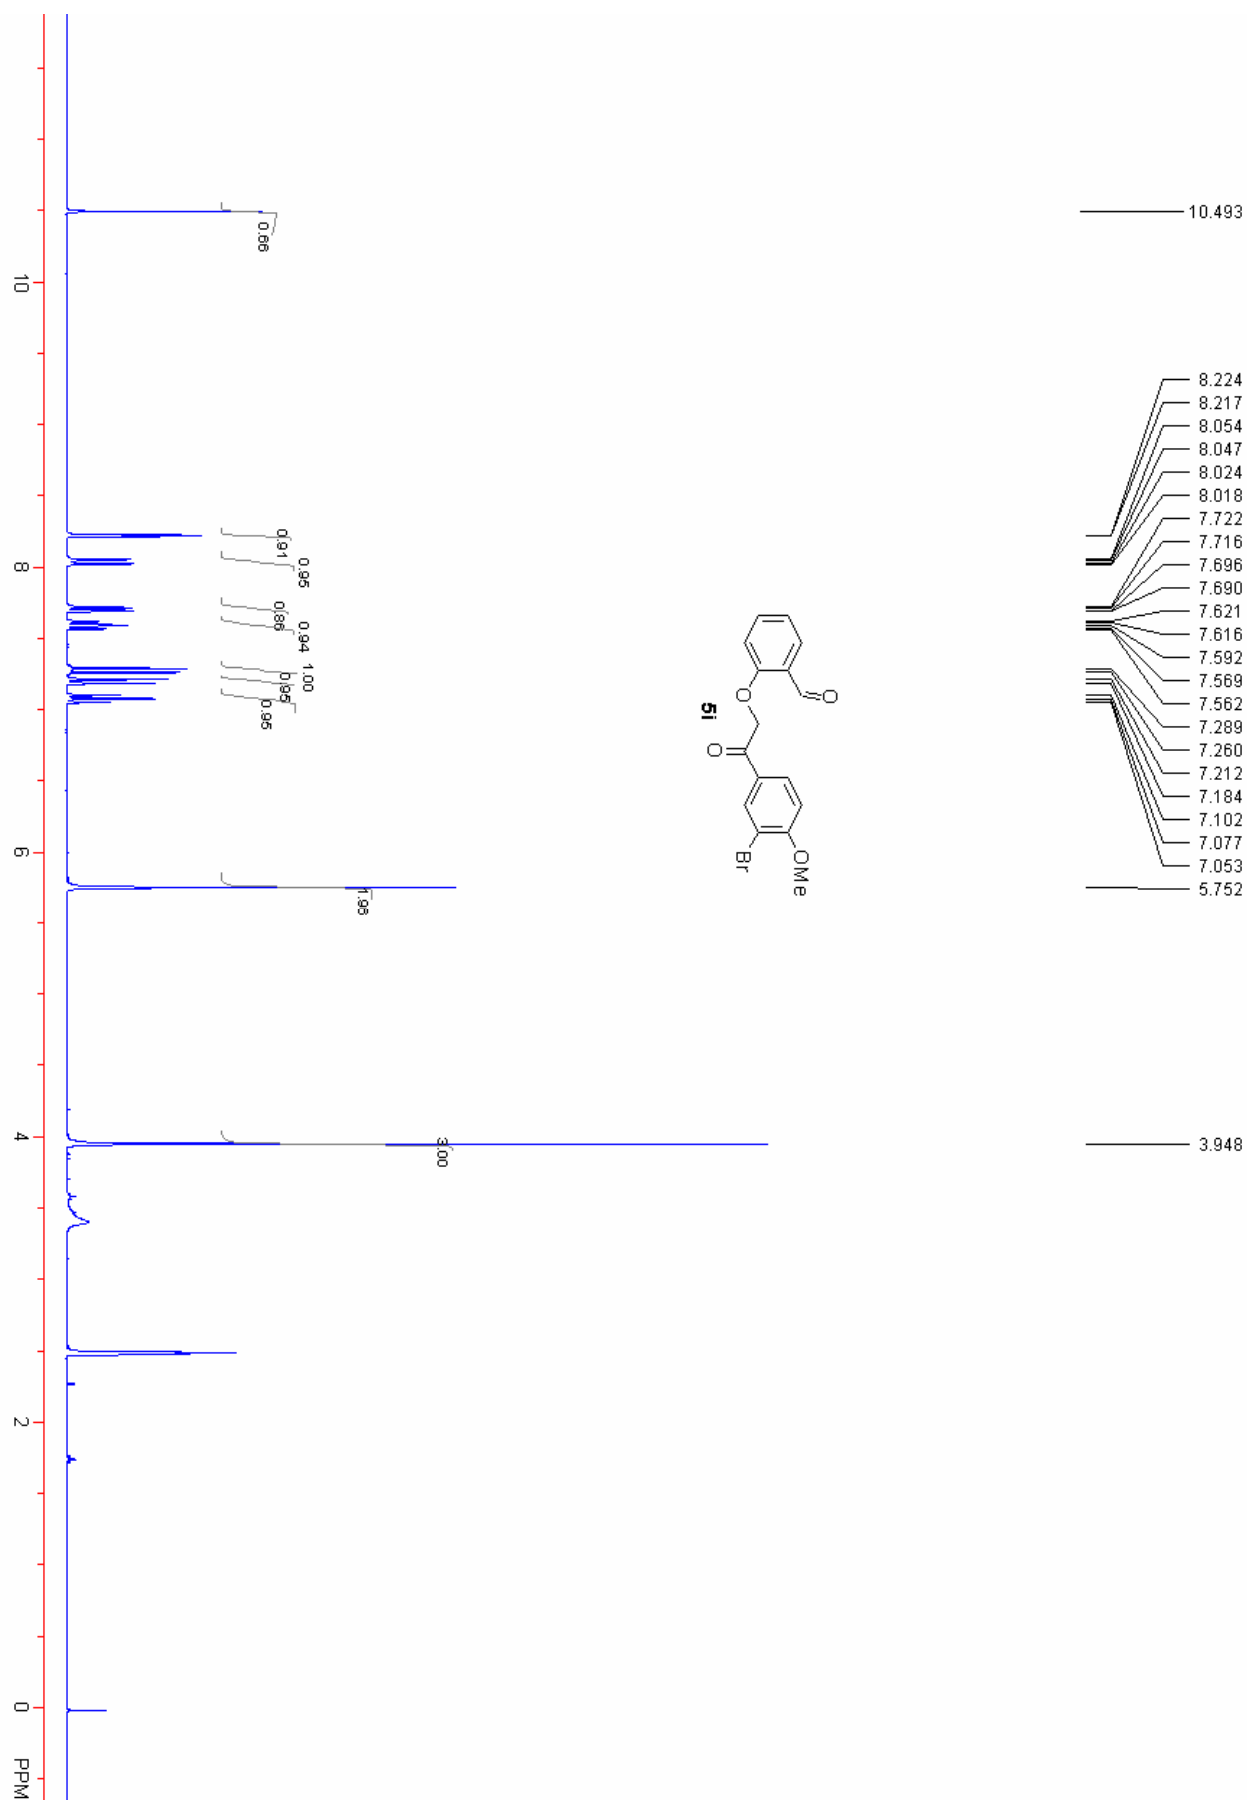

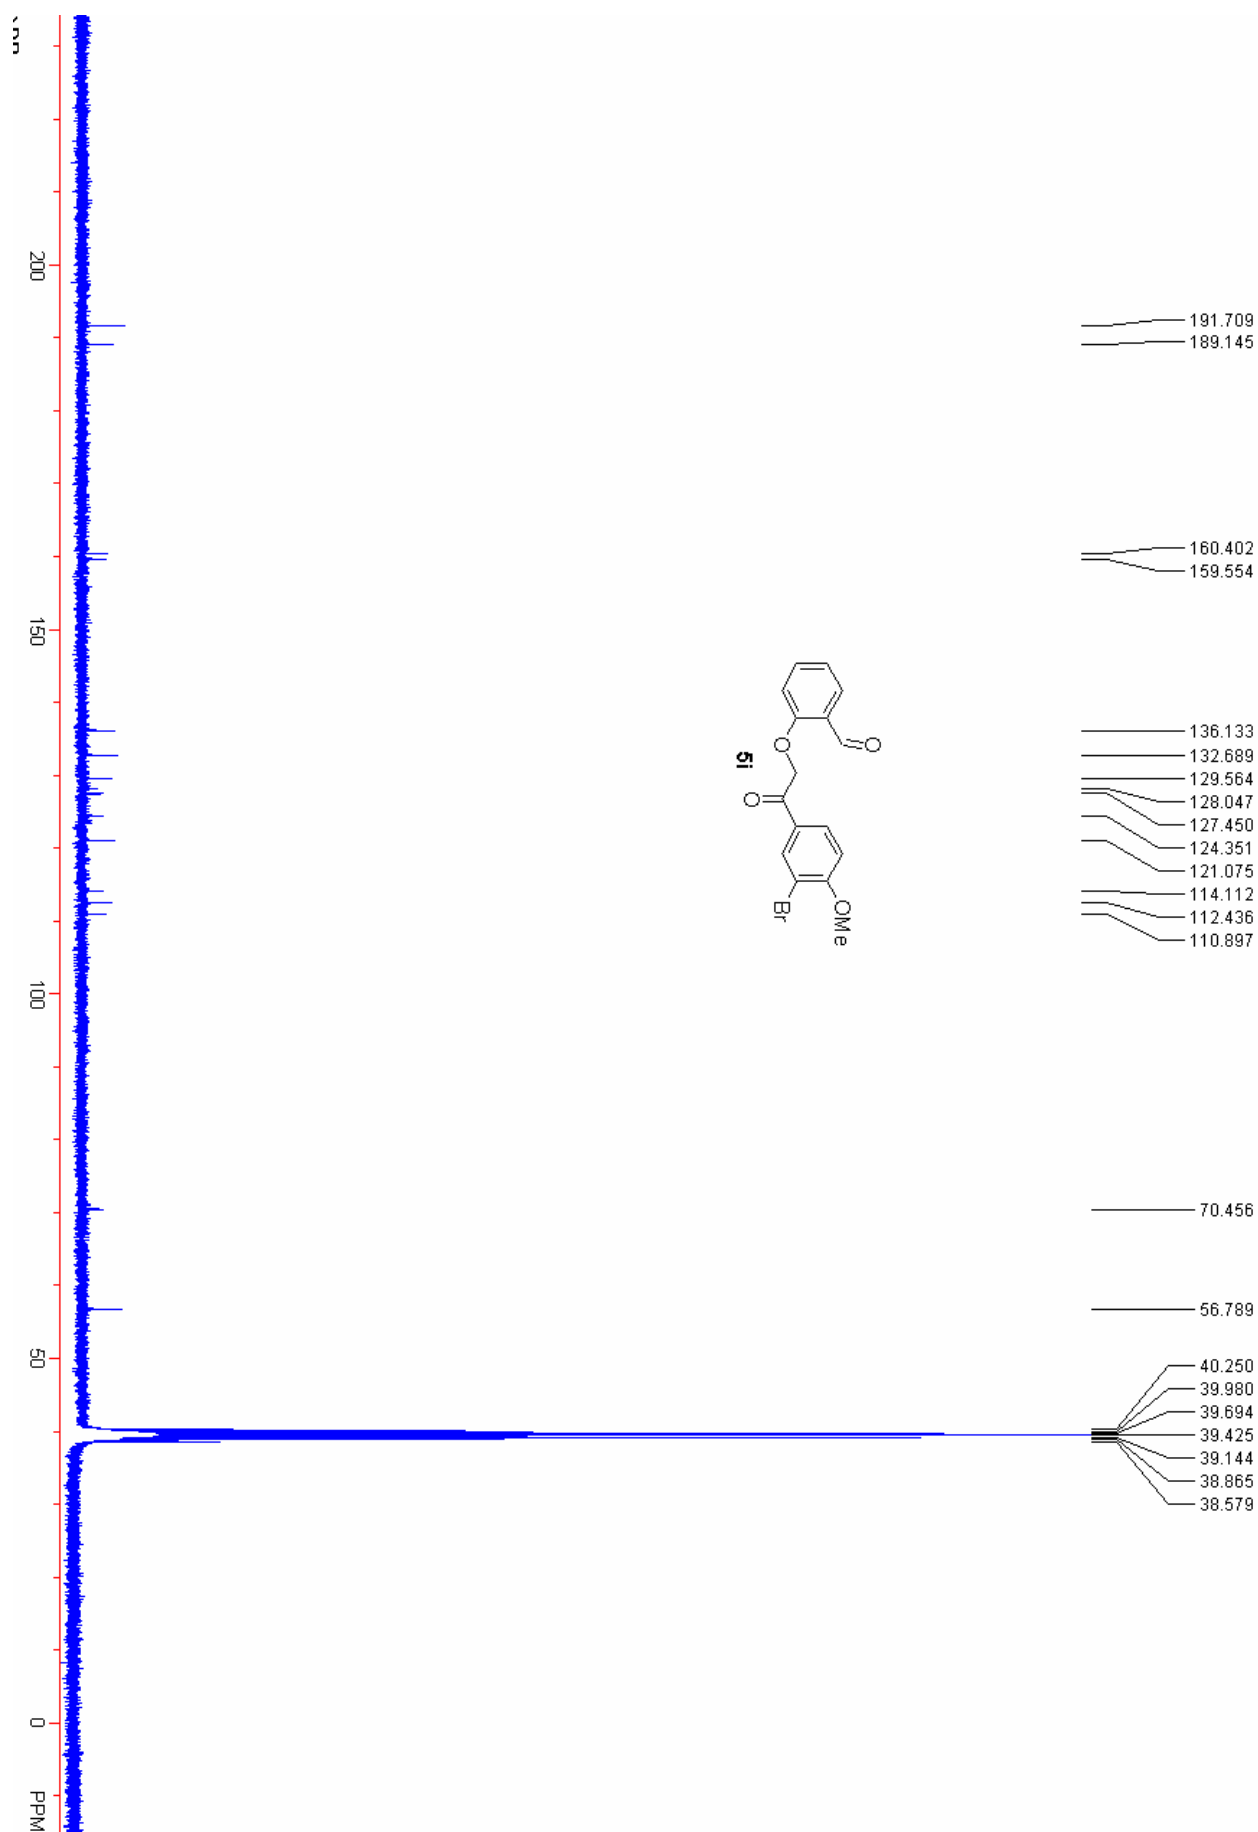

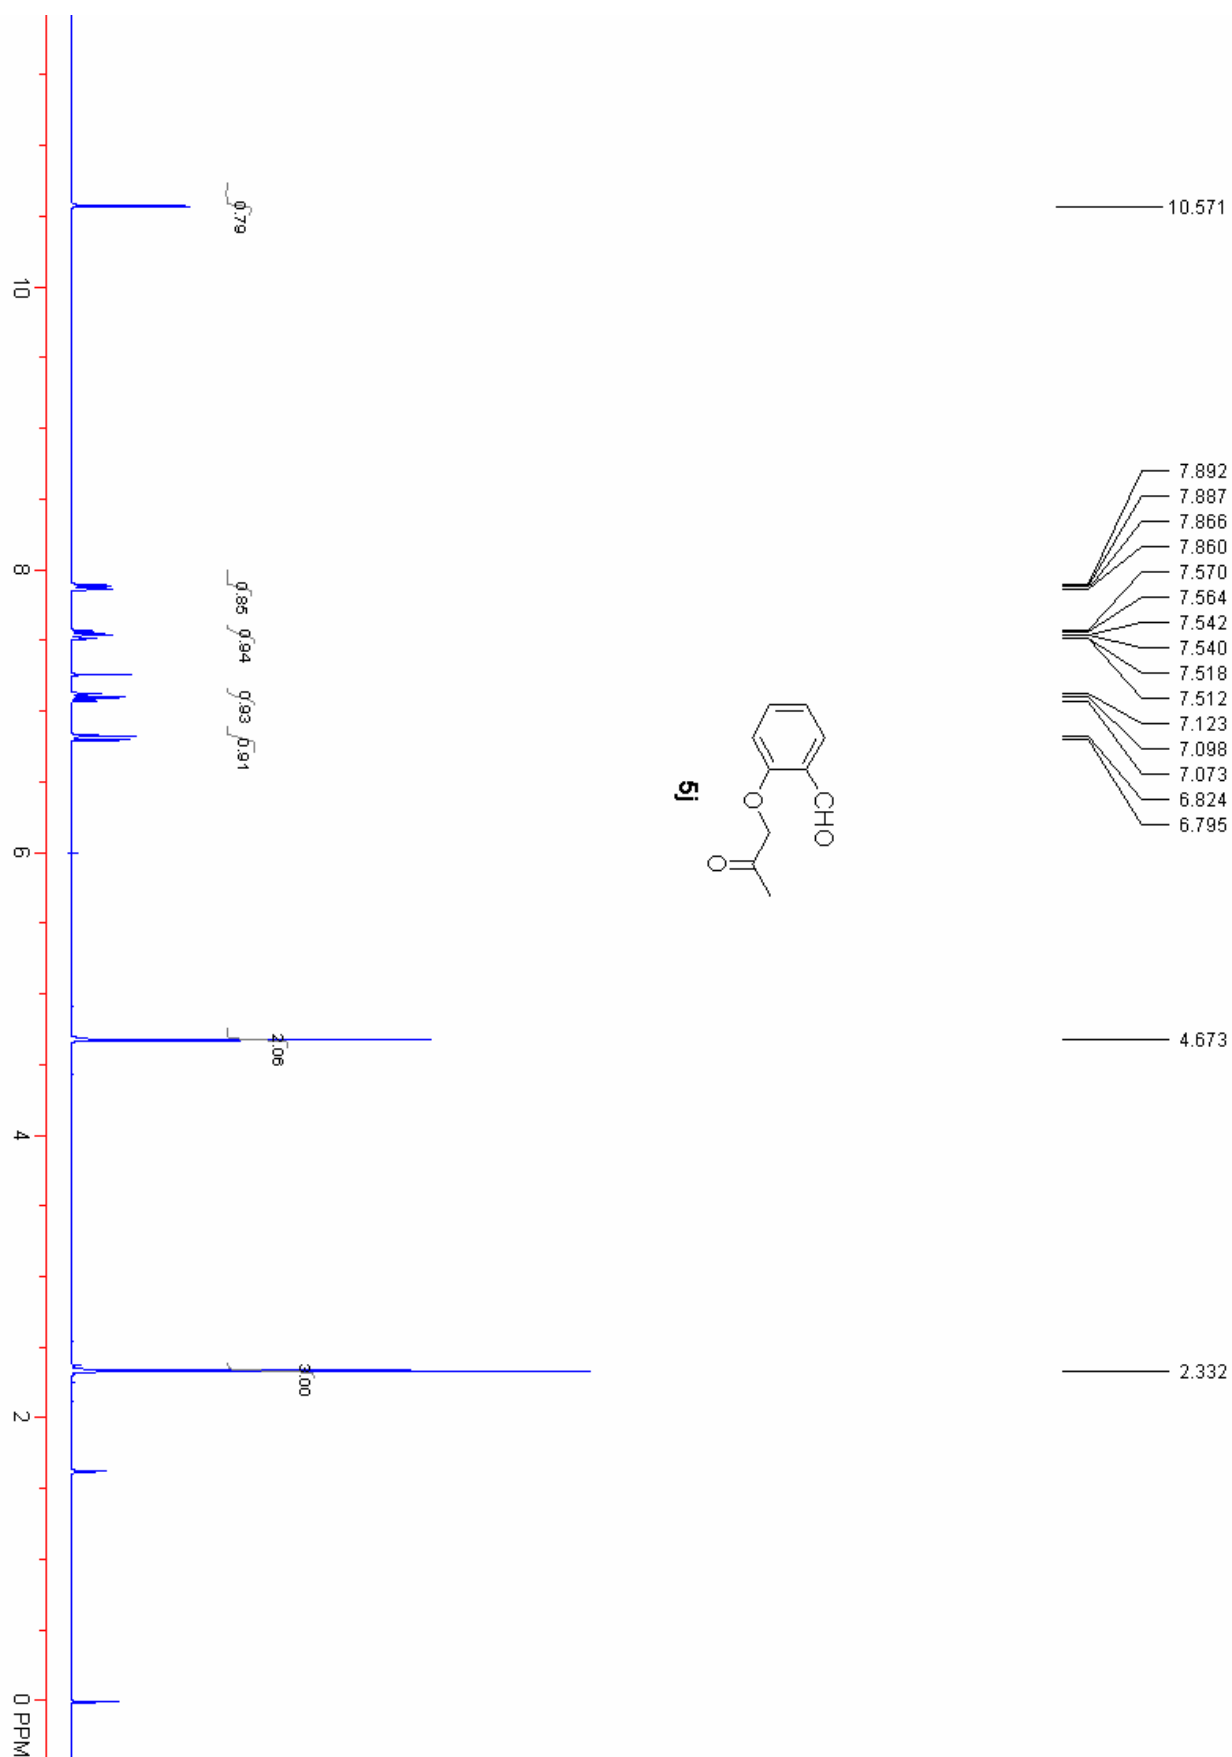

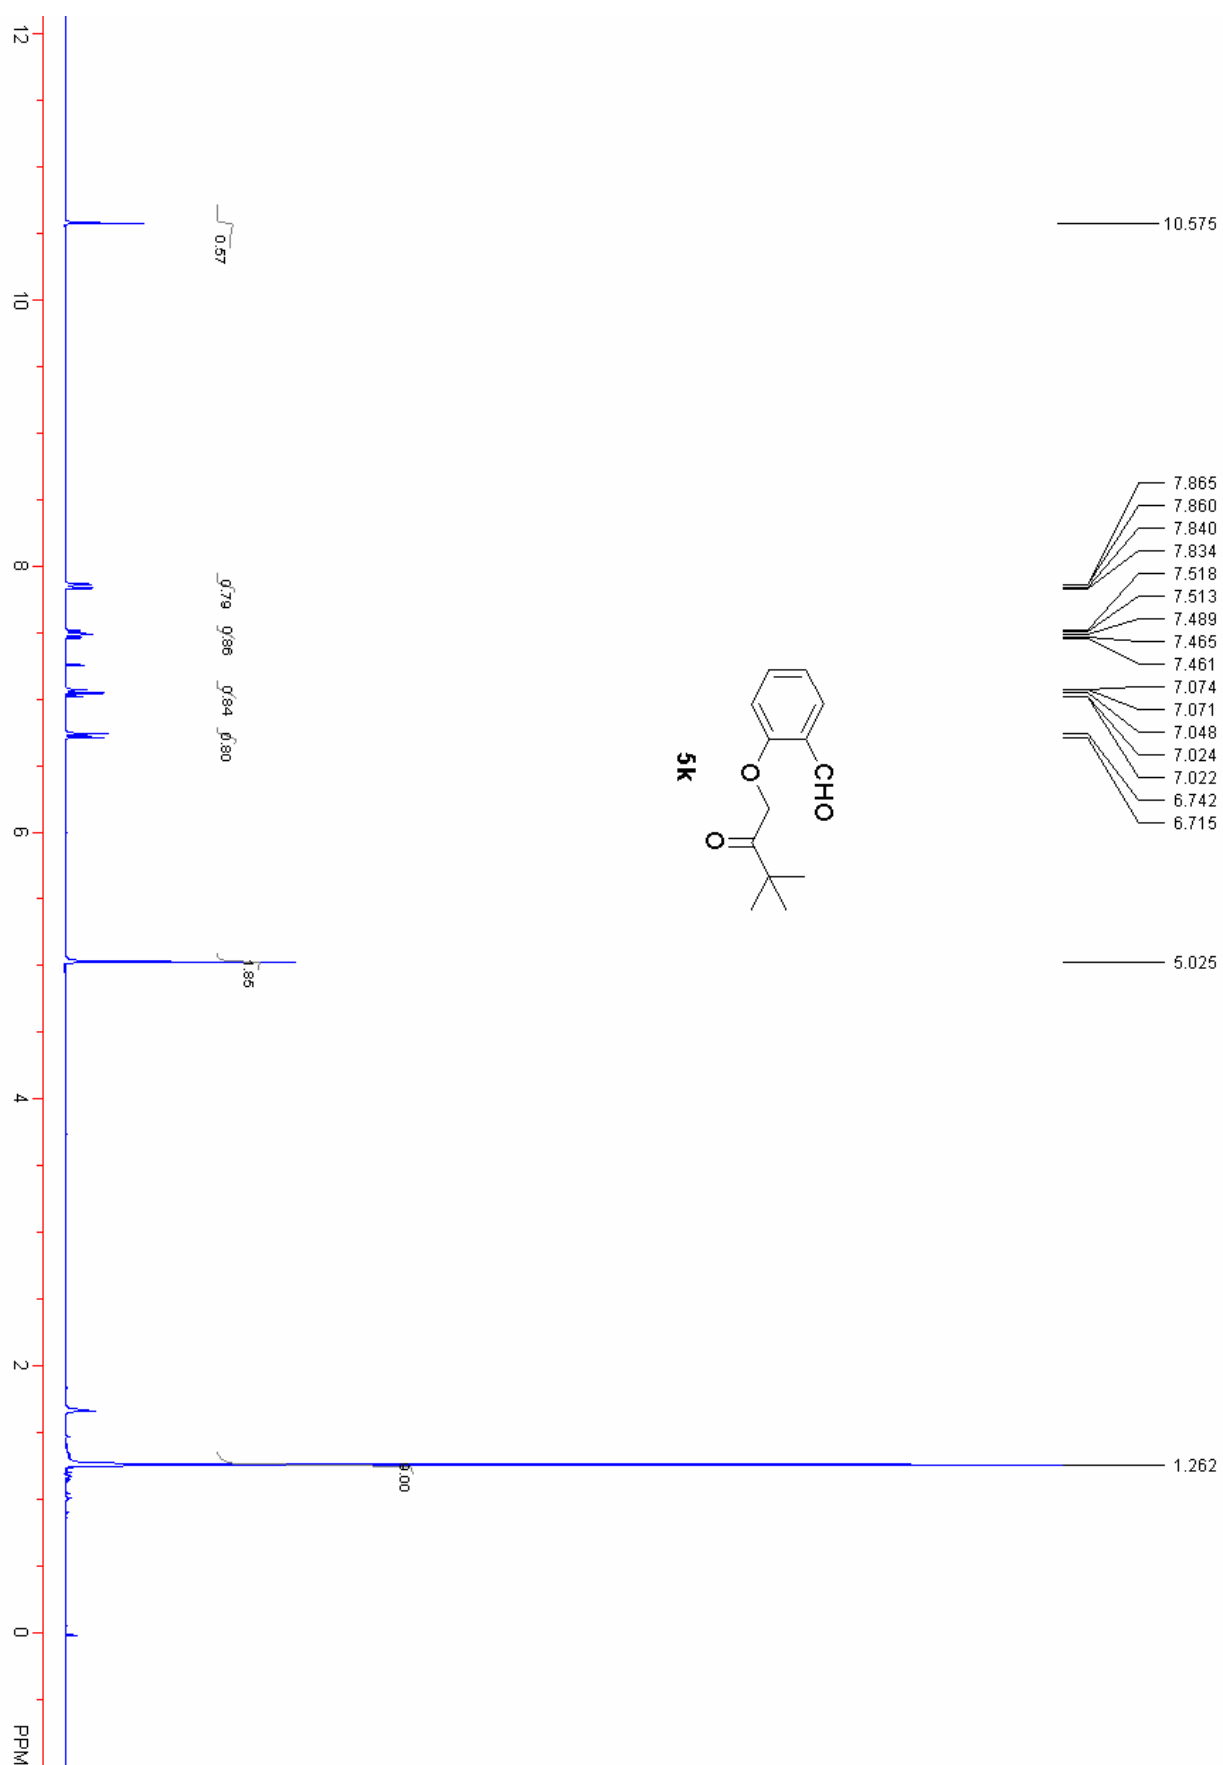

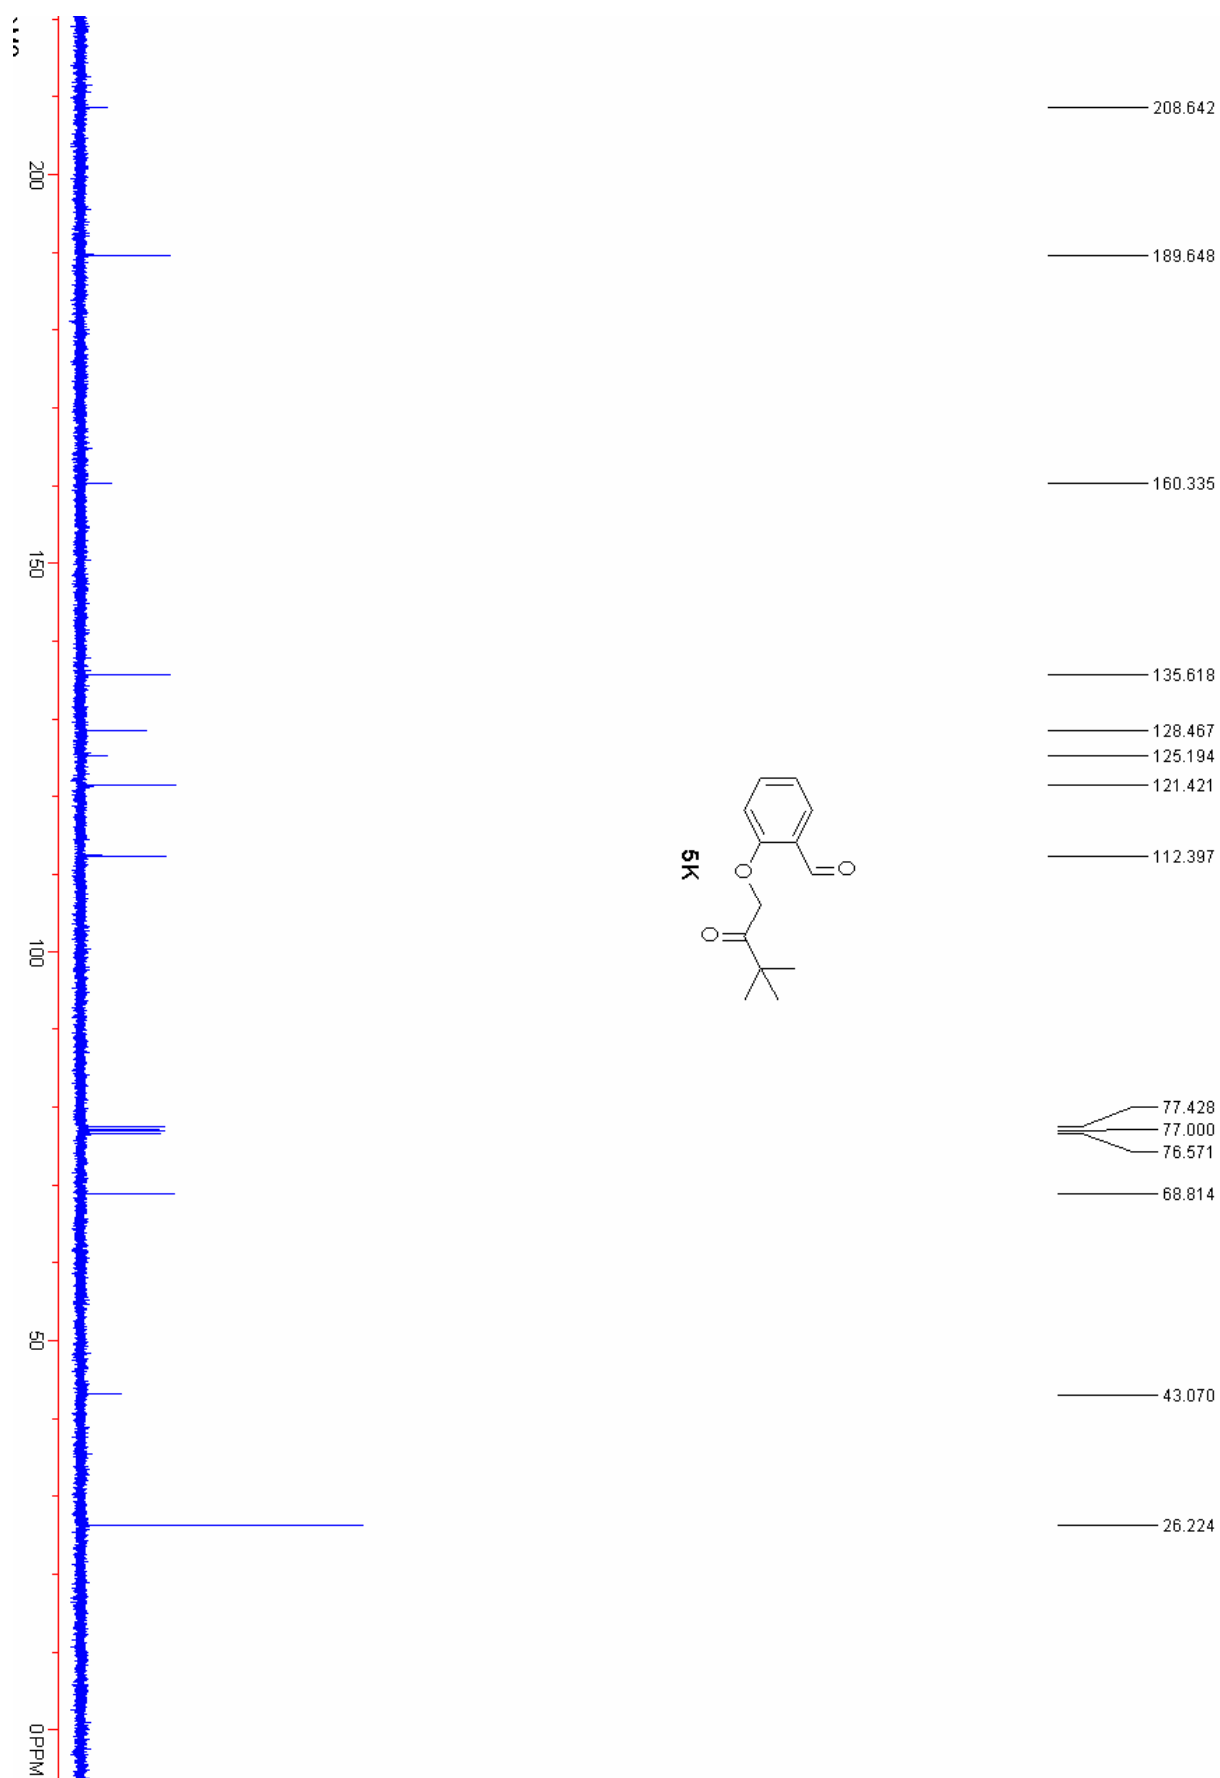

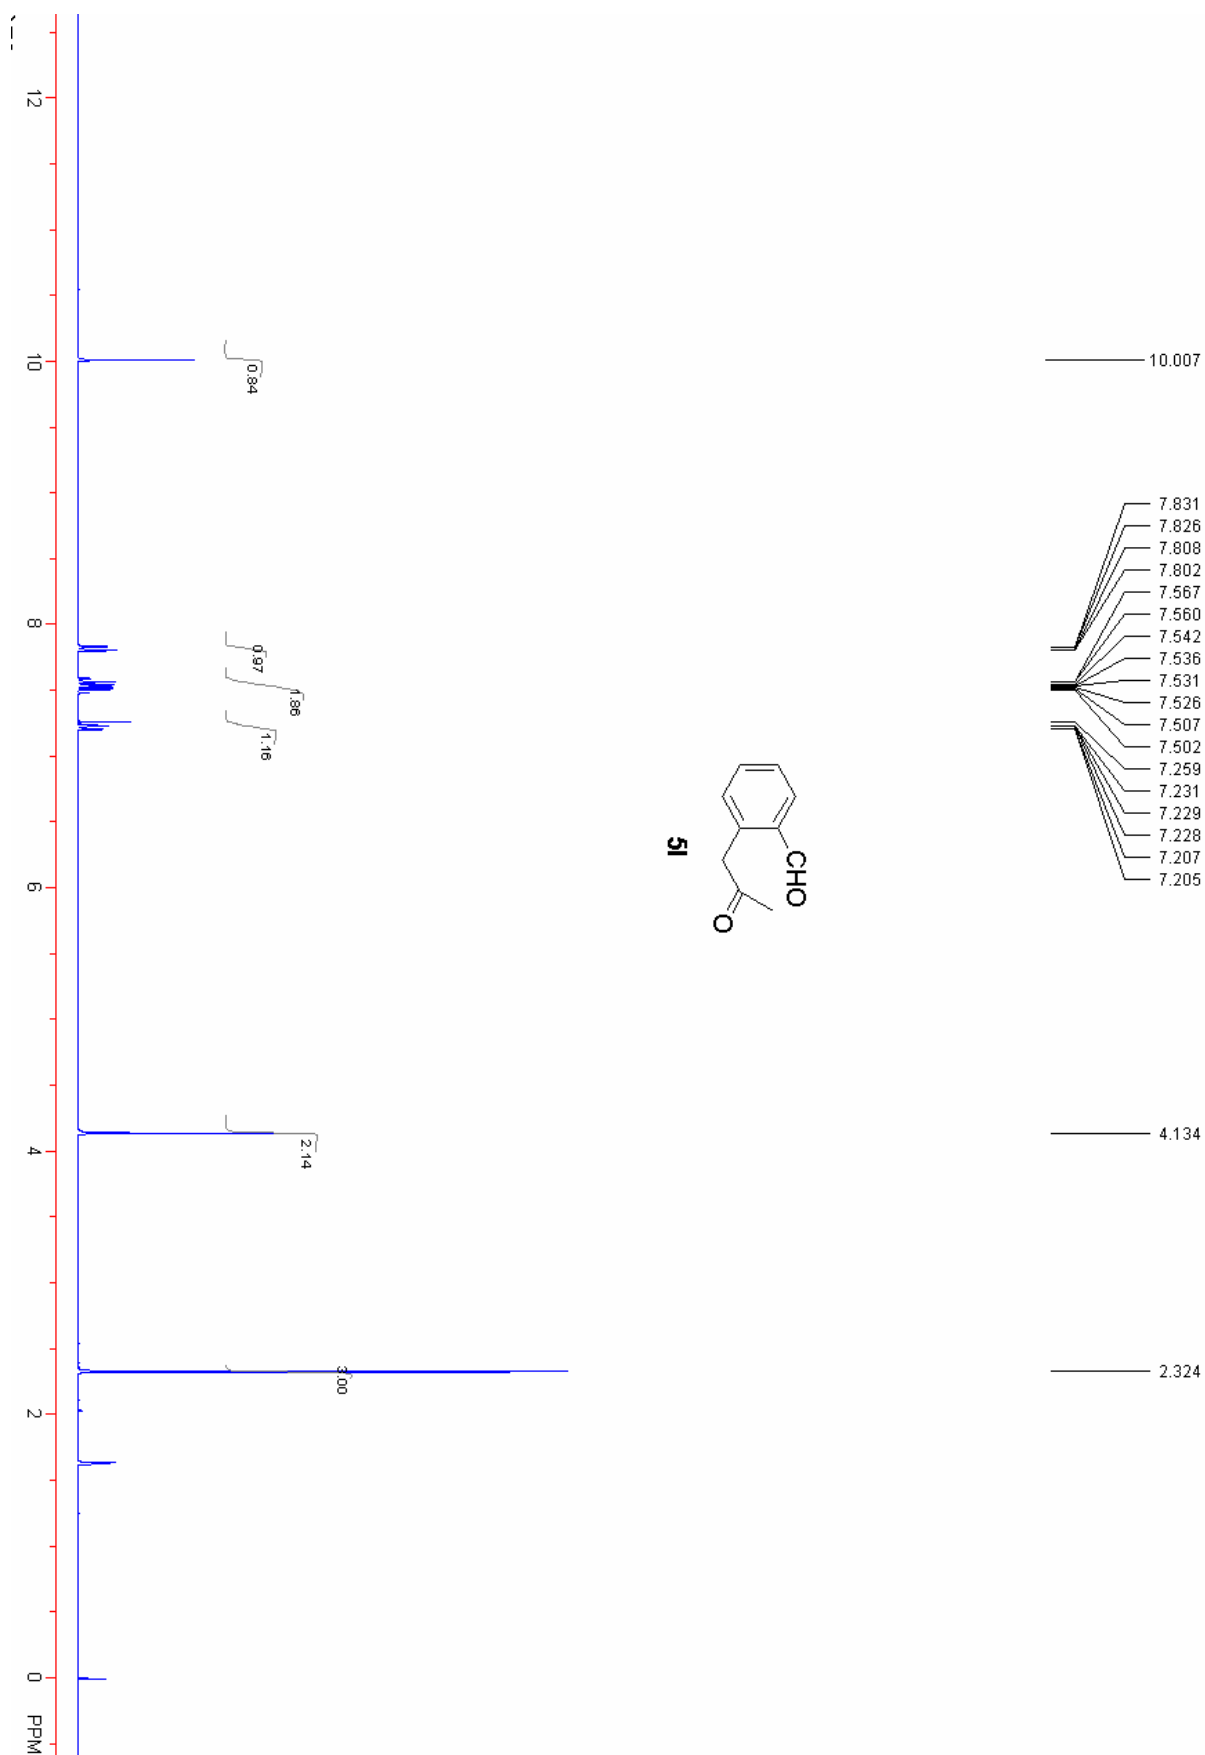

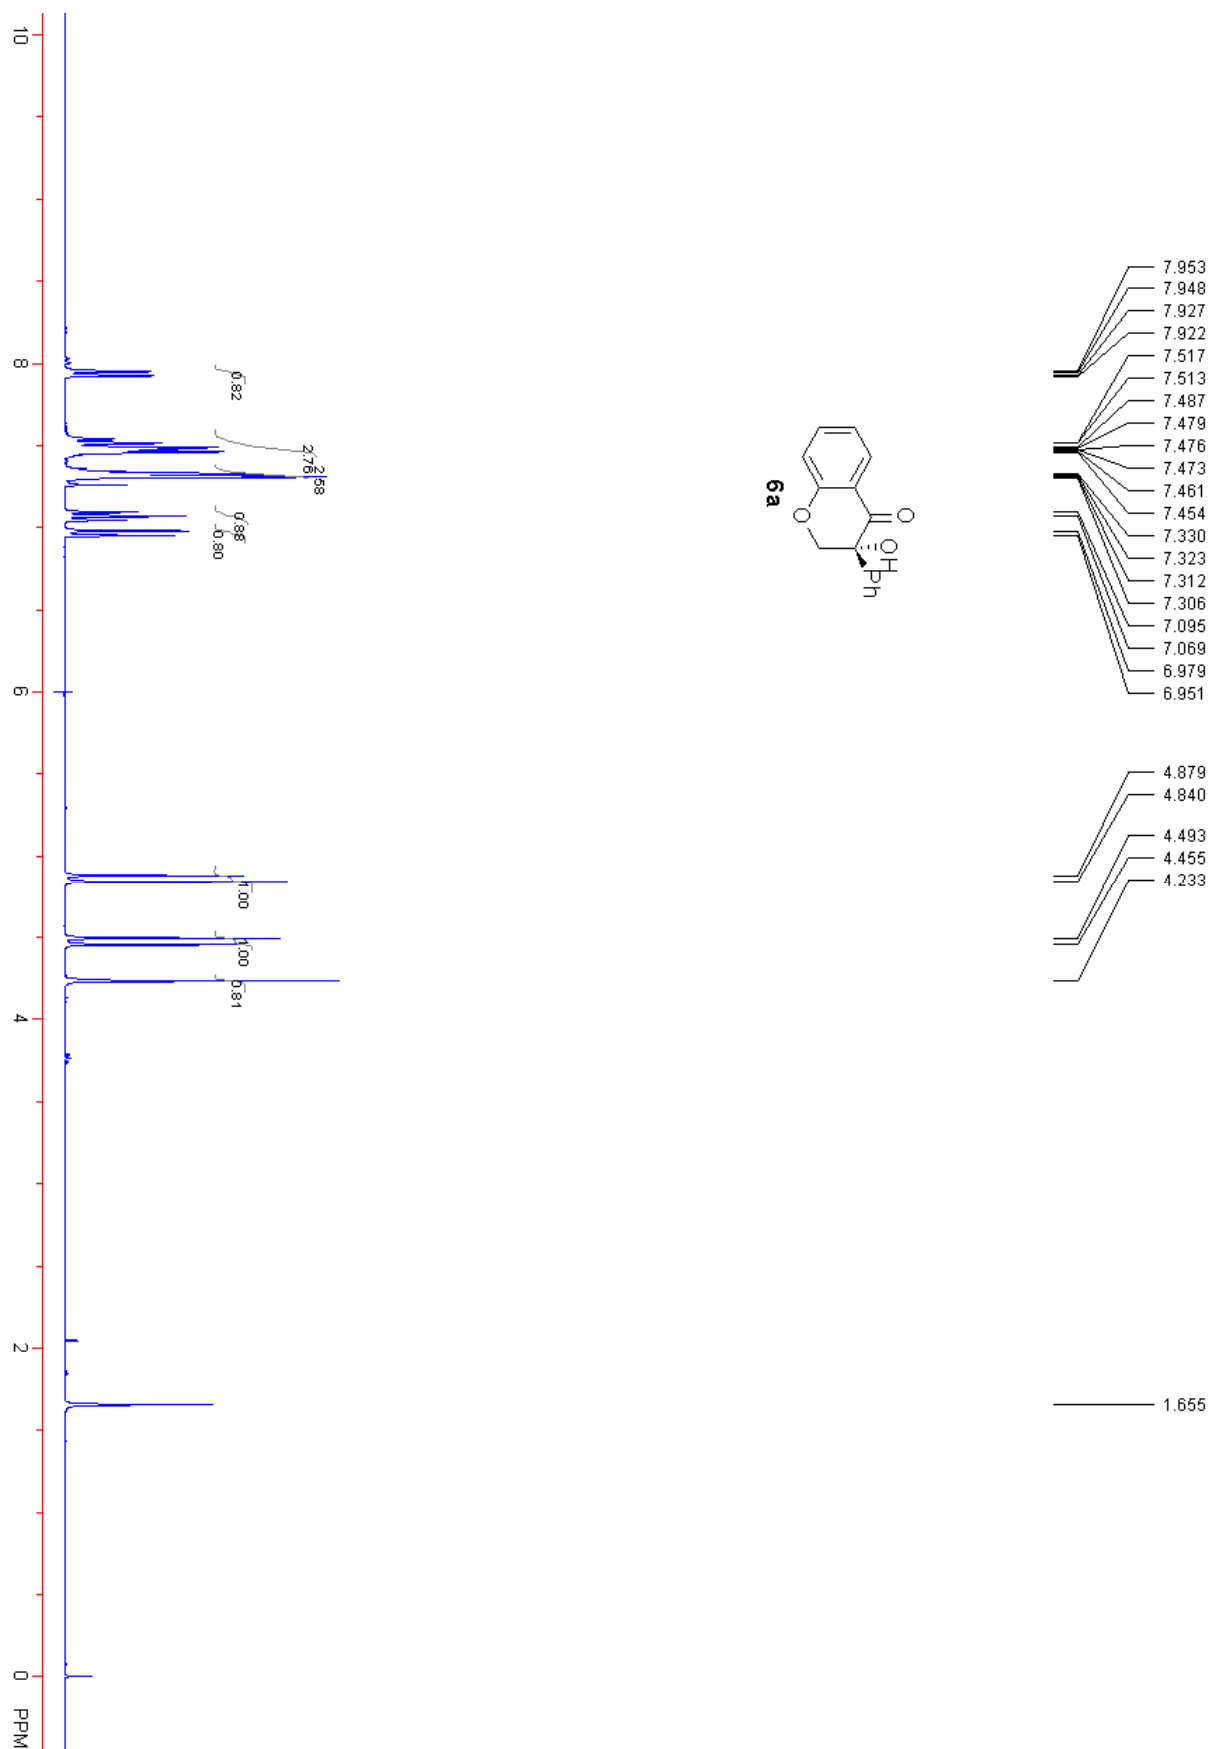

实验时间: 2007-06-22, 13:47:22  
谱图文件: D:\date\ly\样品\ly-3-320000.org

实验者: ly  
报告时间: 2007-06-22, 13:54:20

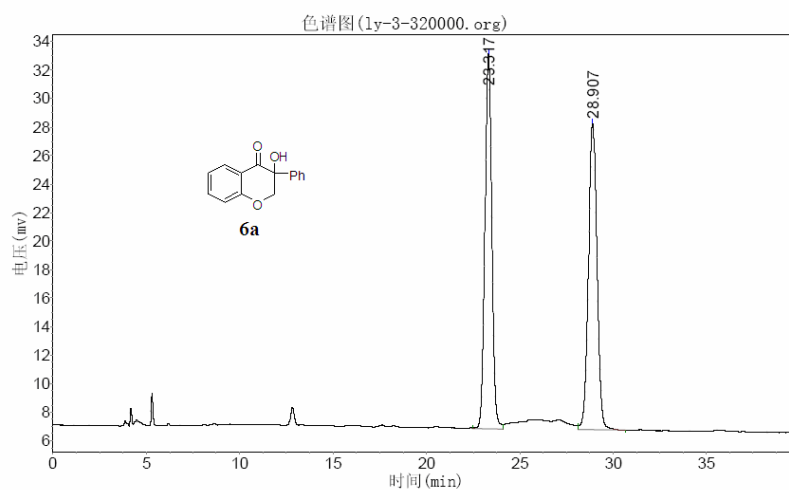

| No. | R. Time | Peak Height | Peak Area   | Percent  |
|-----|---------|-------------|-------------|----------|
| 1   | 23.317  | 26322.977   | 671239.438  | 49.3902  |
| 2   | 28.907  | 21531.582   | 687813.938  | 50.6098  |
| 总计  |         | 47854.559   | 1359053.375 | 100.0000 |

实验时间: 2007-07-04, 10:44:57  
谱图文件: D:\date\ly\样品\ly-3-430000.org

实验者: ly  
报告时间: 2007-07-04, 10:49:48

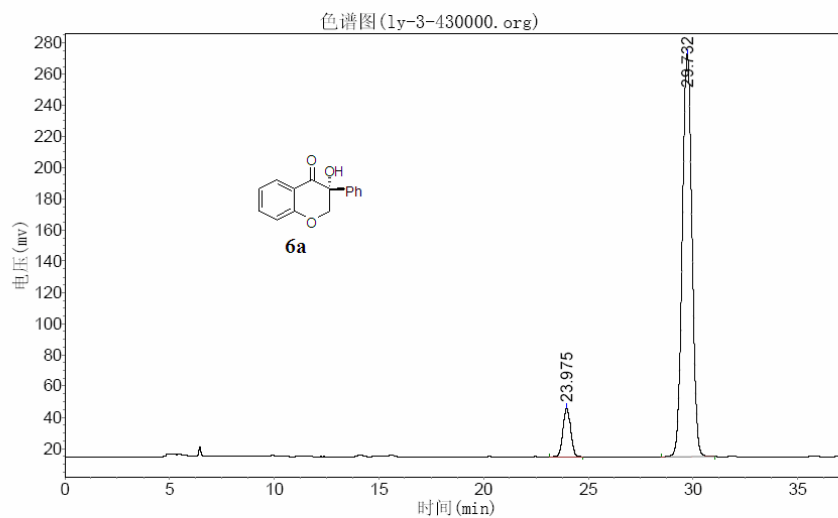

| No. | R. Time | Peak Height | Peak Area   | Percent  |
|-----|---------|-------------|-------------|----------|
| 1   | 23.975  | 8887.660    | 189315.172  | 7.7224   |
| 2   | 29.732  | 85025.695   | 2262203.750 | 92.2776  |
| 总计  |         | 93913.355   | 2451518.922 | 100.0000 |

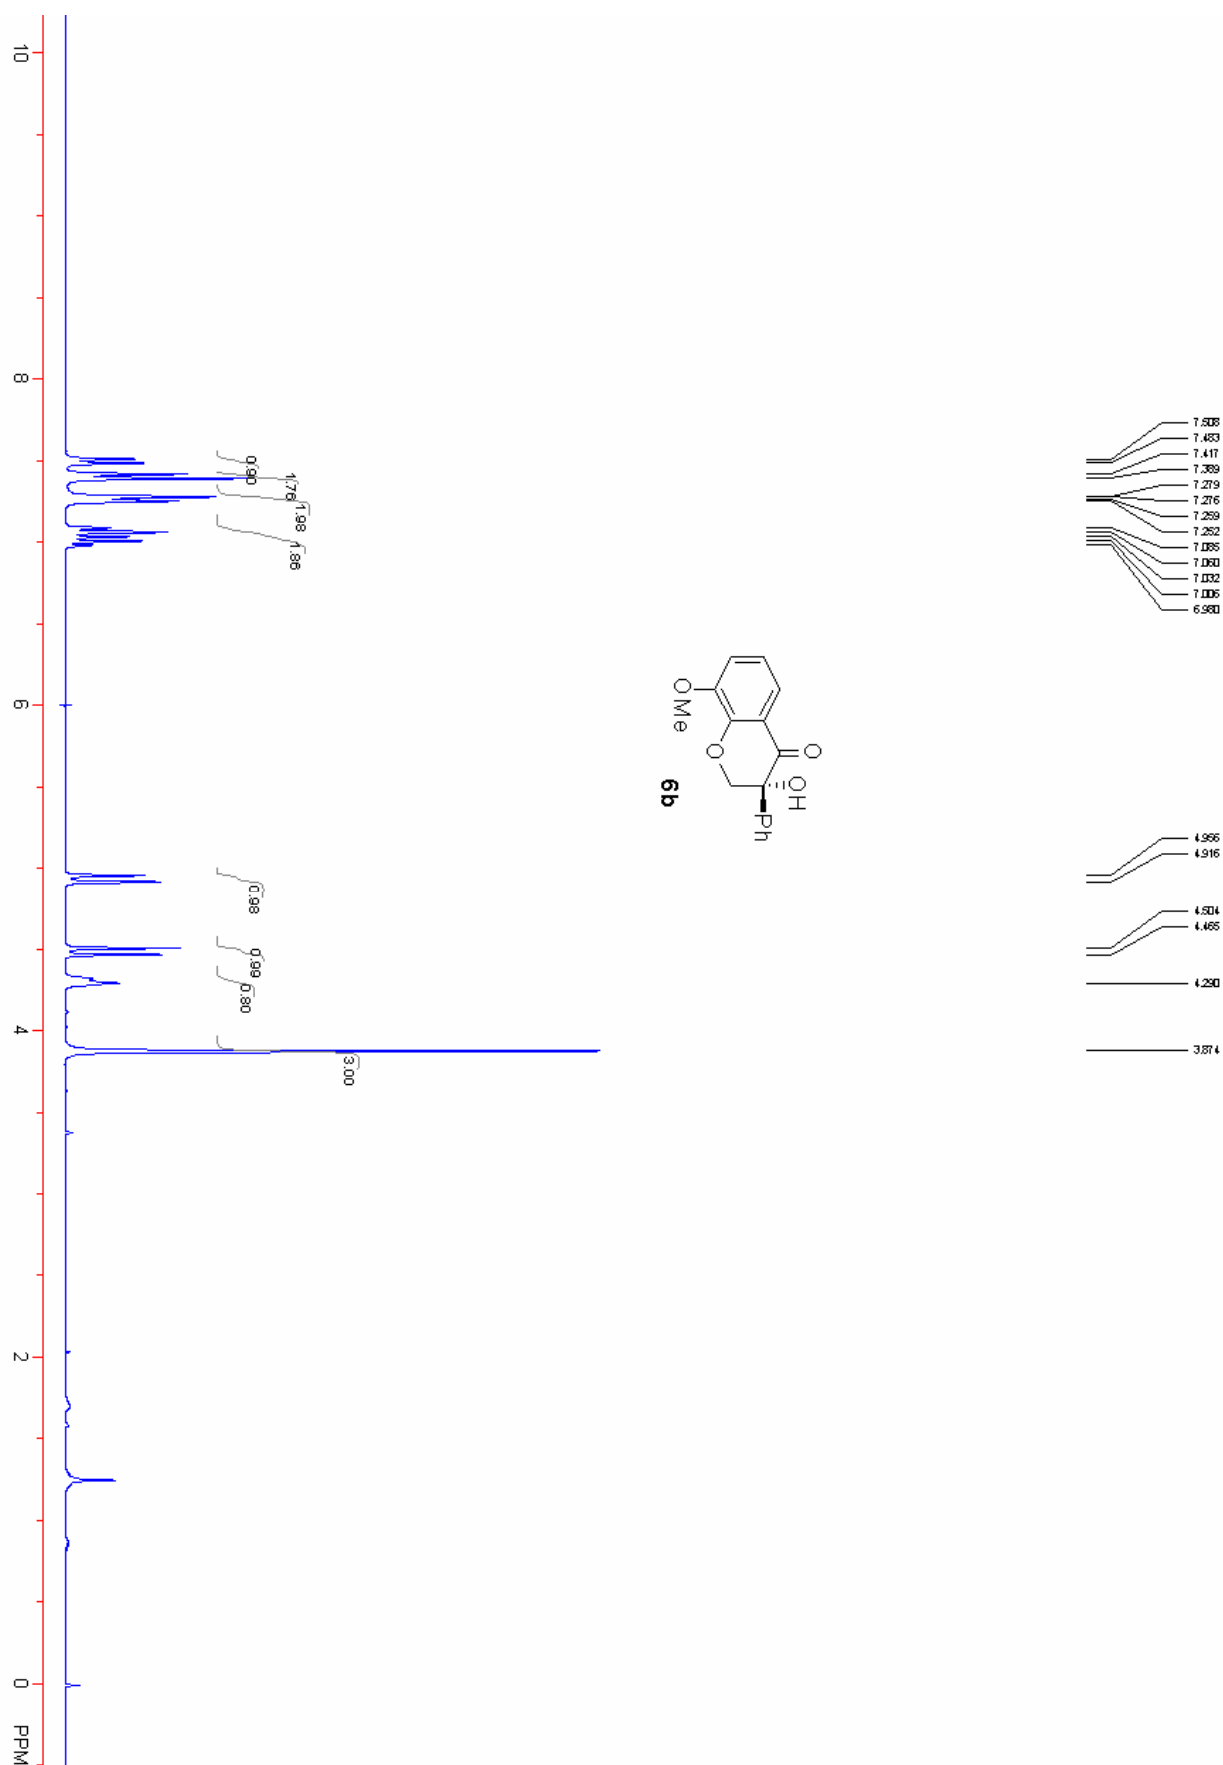

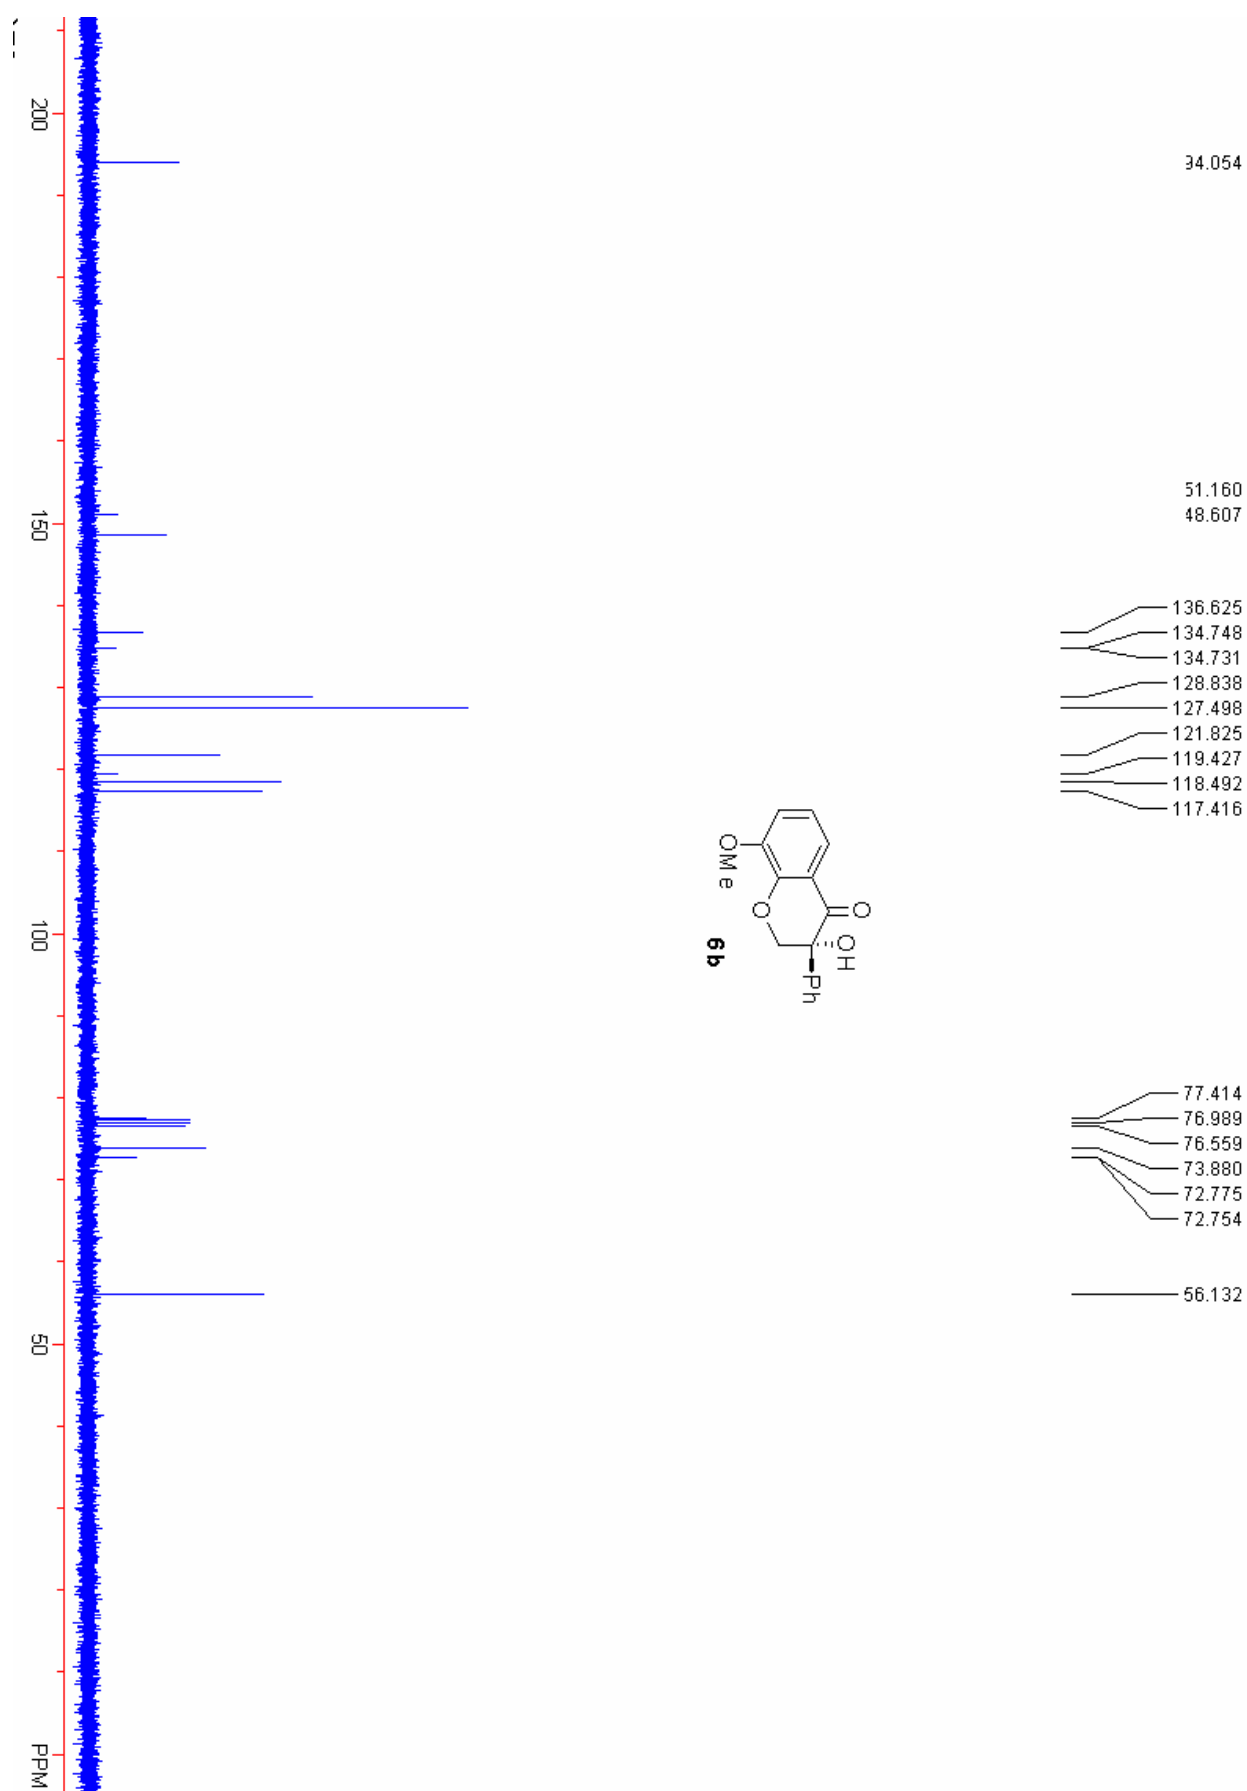

实验时间: 2066-11-16, 17:00:13  
谱图文件: D:\date\ly\样品\ly-4-23rac0001. org

实验者: ly  
报告时间: 2066-11-16, 17:53:46

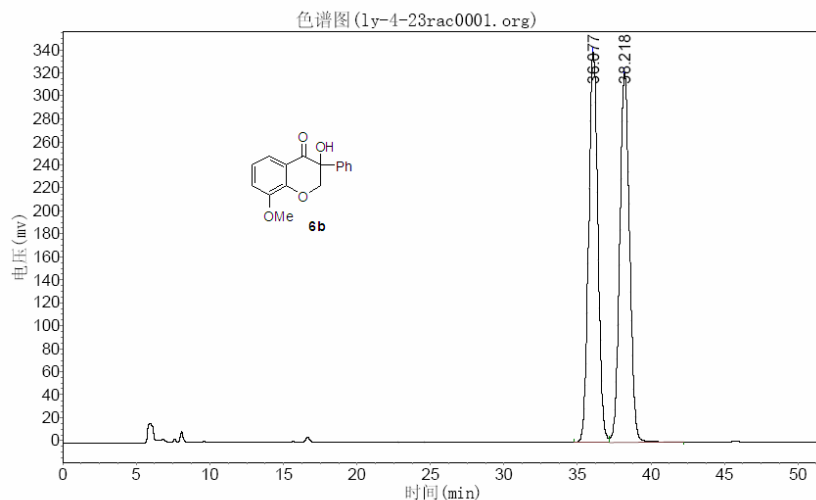

| No. | R. Time | PeakHeight | PeakArea     | PerCent  |
|-----|---------|------------|--------------|----------|
| 1   | 36.077  | 340200.094 | 14889927.000 | 49.7251  |
| 2   | 38.218  | 321910.063 | 15054571.000 | 50.2749  |
| 总计  |         | 662110.156 | 29944498.000 | 100.0000 |

实验时间: 2066-11-16, 19:13:29  
谱图文件: D:\date\ly\样品\ly-4-260000. org

实验者: ly  
报告时间: 2066-11-16, 19:17:44

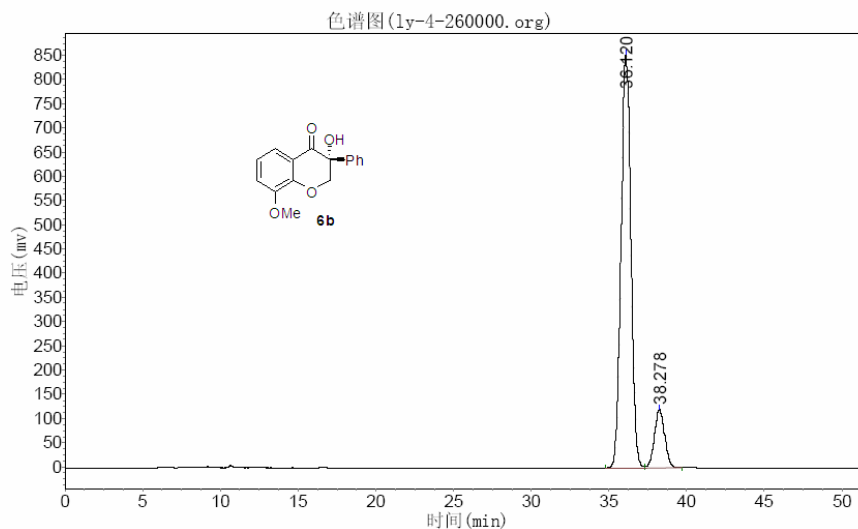

| No. | R. Time | PeakHeight | PeakArea     | PerCent  |
|-----|---------|------------|--------------|----------|
| 1   | 36.120  | 854128.000 | 37443528.000 | 87.1682  |
| 2   | 38.278  | 120049.547 | 5511970.000  | 12.8318  |
| 总计  |         | 974177.547 | 42955498.000 | 100.0000 |

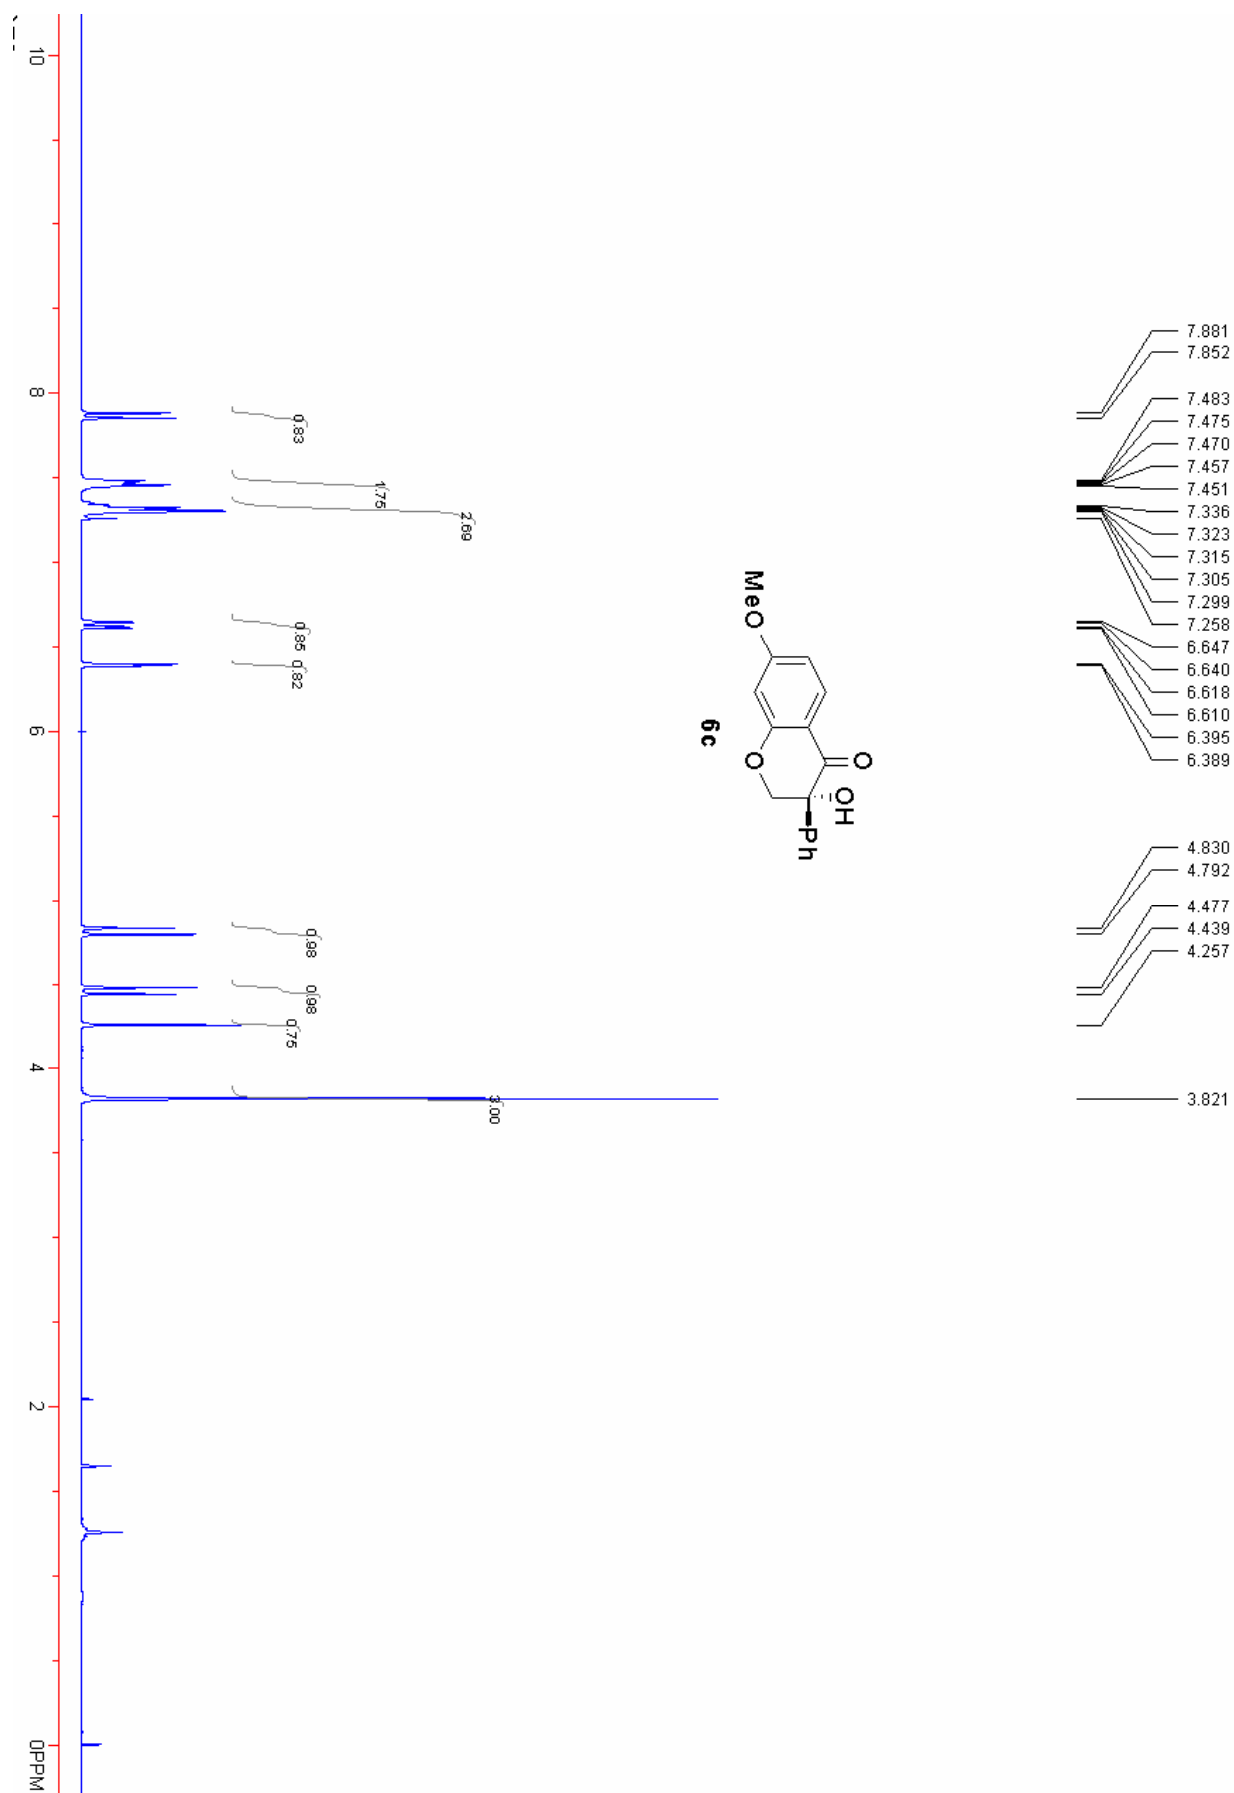

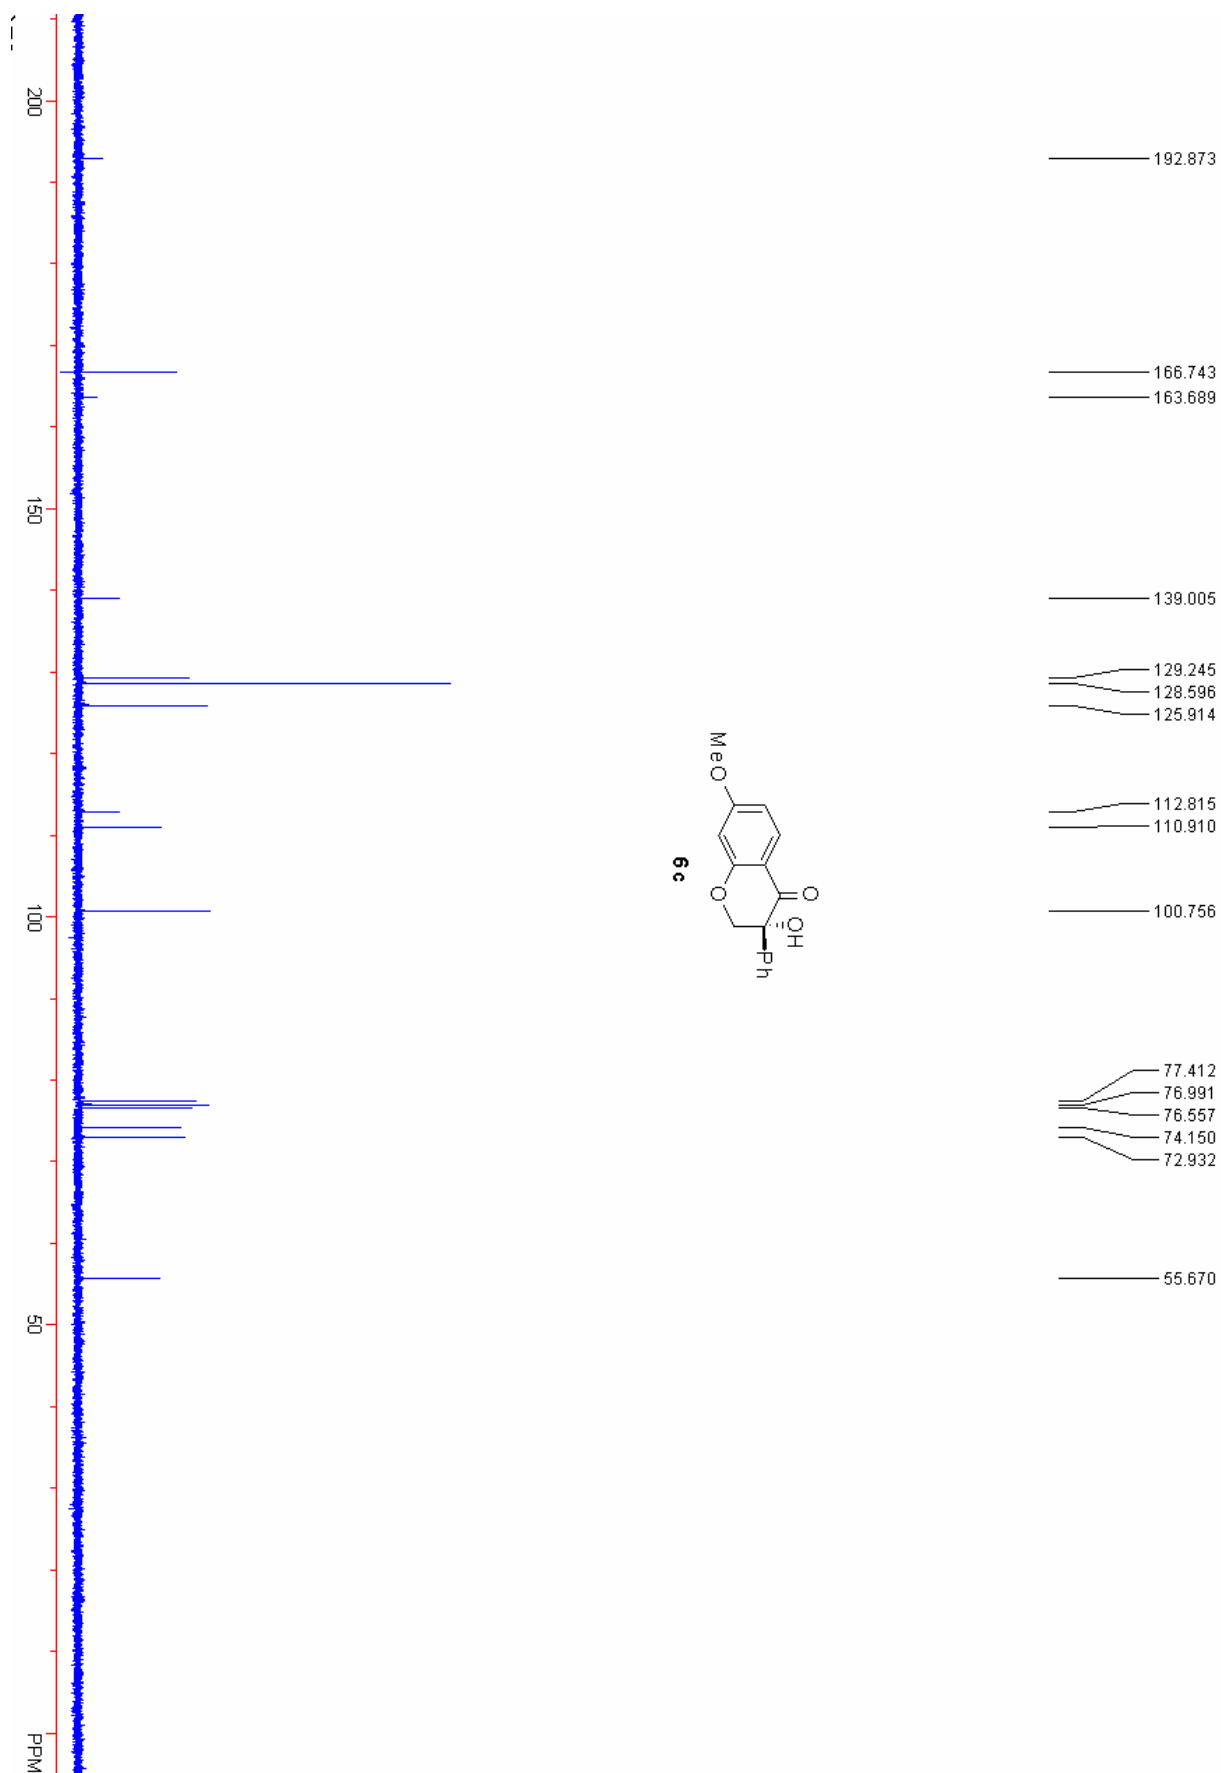

实验时间: 2066-11-06, 23:16:01  
谱图文件: D:\date\ly\样品\ly-4-15rac0001.org

实验者: ly  
报告时间: 2066-11-07, 8:37:00

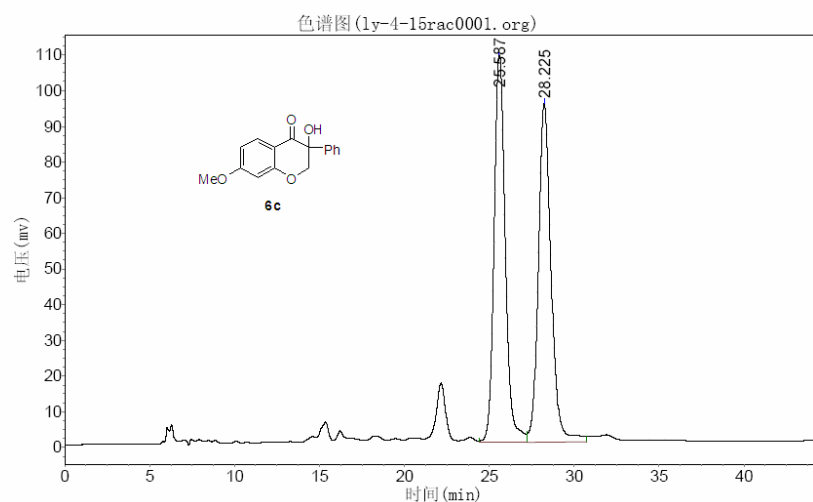

| No. | R. Time | PeakHeight | PeakArea    | PerCent  |
|-----|---------|------------|-------------|----------|
| 1   | 25.587  | 108605.430 | 4915090.500 | 49.6039  |
| 2   | 28.225  | 95013.914  | 4993597.000 | 50.3961  |
| 总计  |         | 203619.344 | 9908687.500 | 100.0000 |

实验时间: 2066-11-07, 9:04:38  
谱图文件: D:\date\ly\样品\ly-4-160000.org

实验者: ly  
报告时间: 2066-11-07, 9:05:50

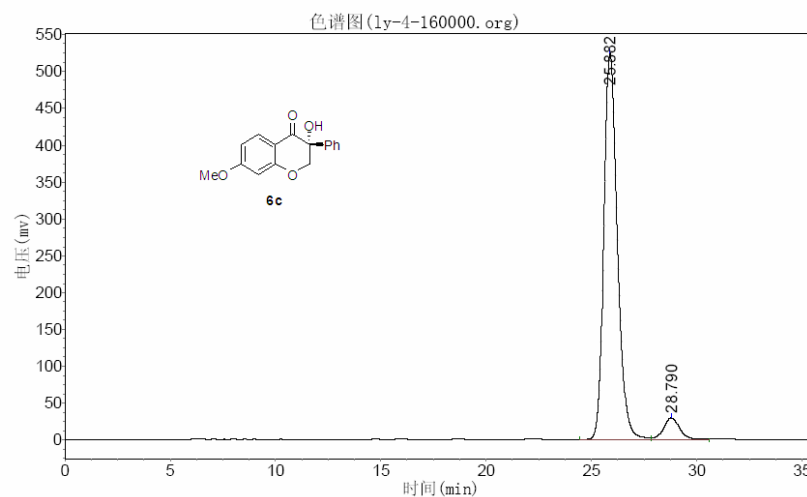

| No. | R. Time | PeakHeight | PeakArea     | PerCent  |
|-----|---------|------------|--------------|----------|
| 1   | 25.882  | 524444.813 | 23268358.000 | 93.6954  |
| 2   | 28.790  | 29491.820  | 1565683.375  | 6.3046   |
| 总计  |         | 553936.633 | 24834041.375 | 100.0000 |

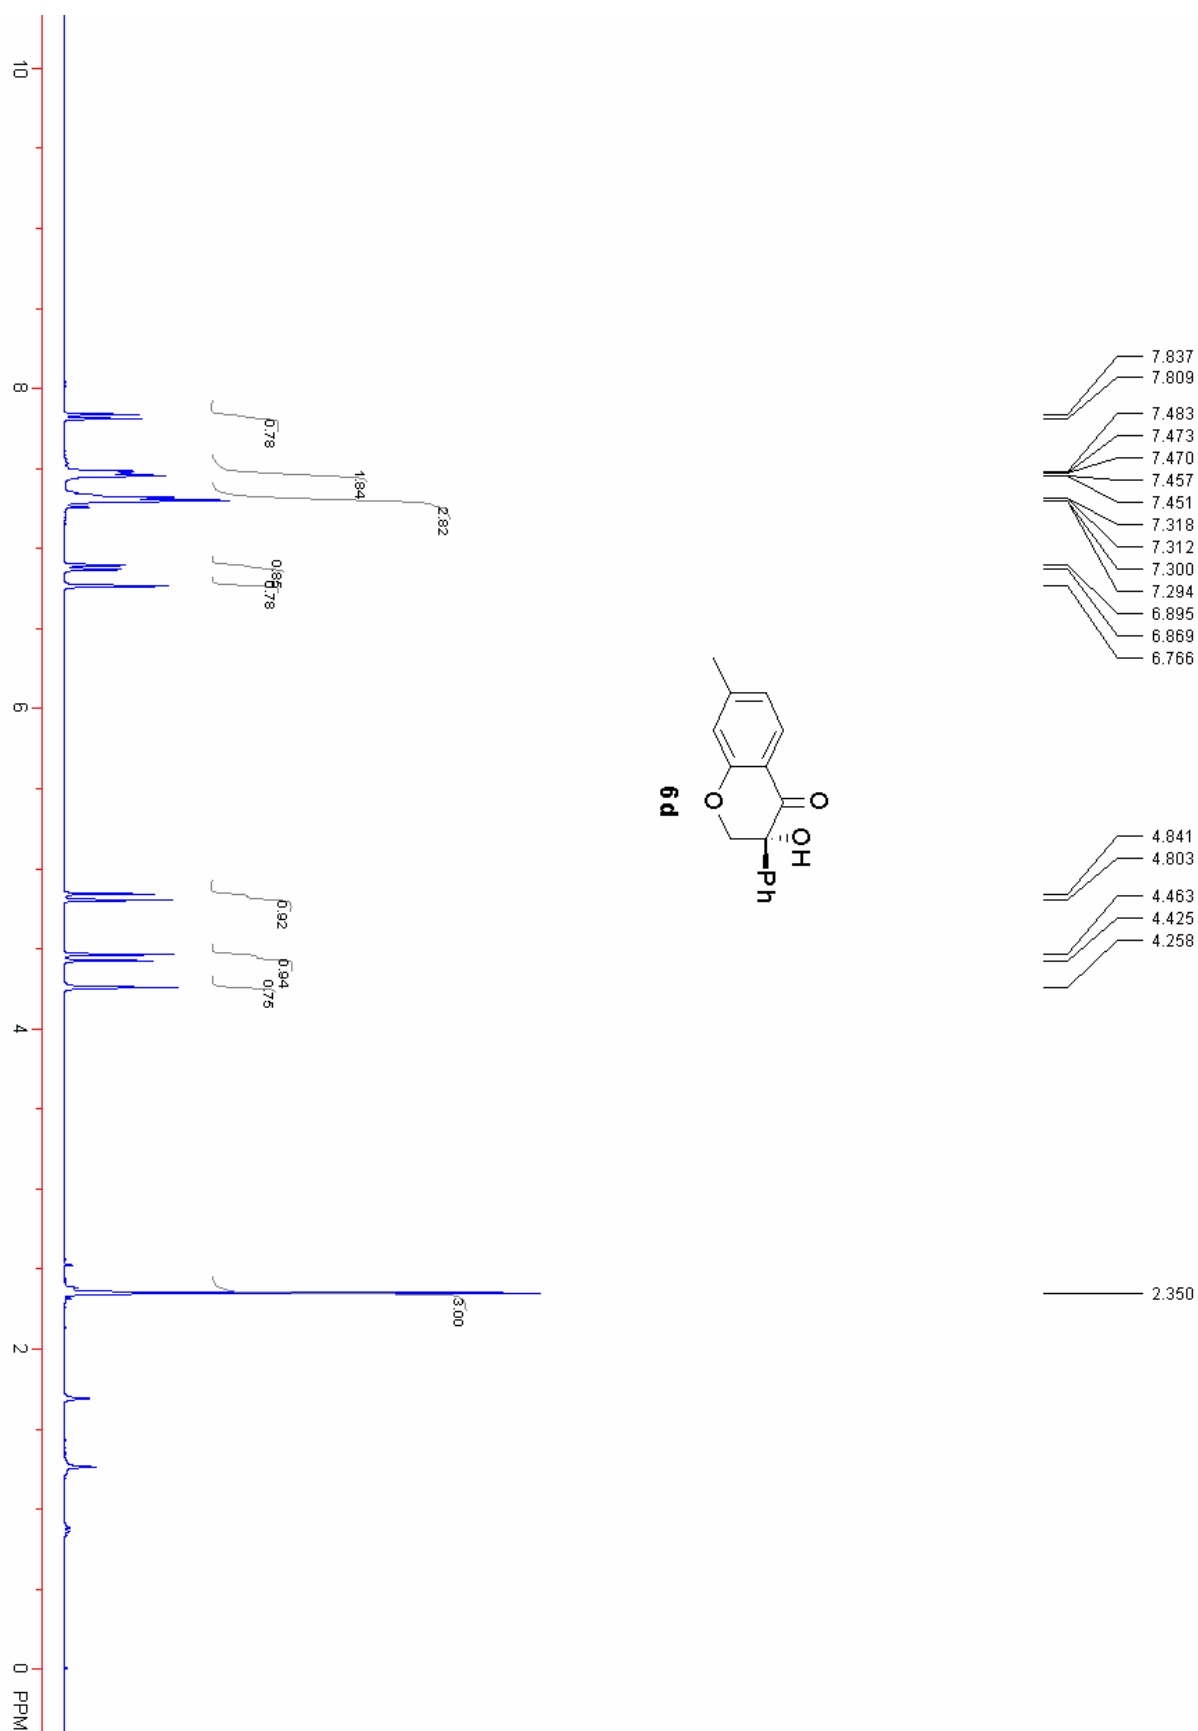

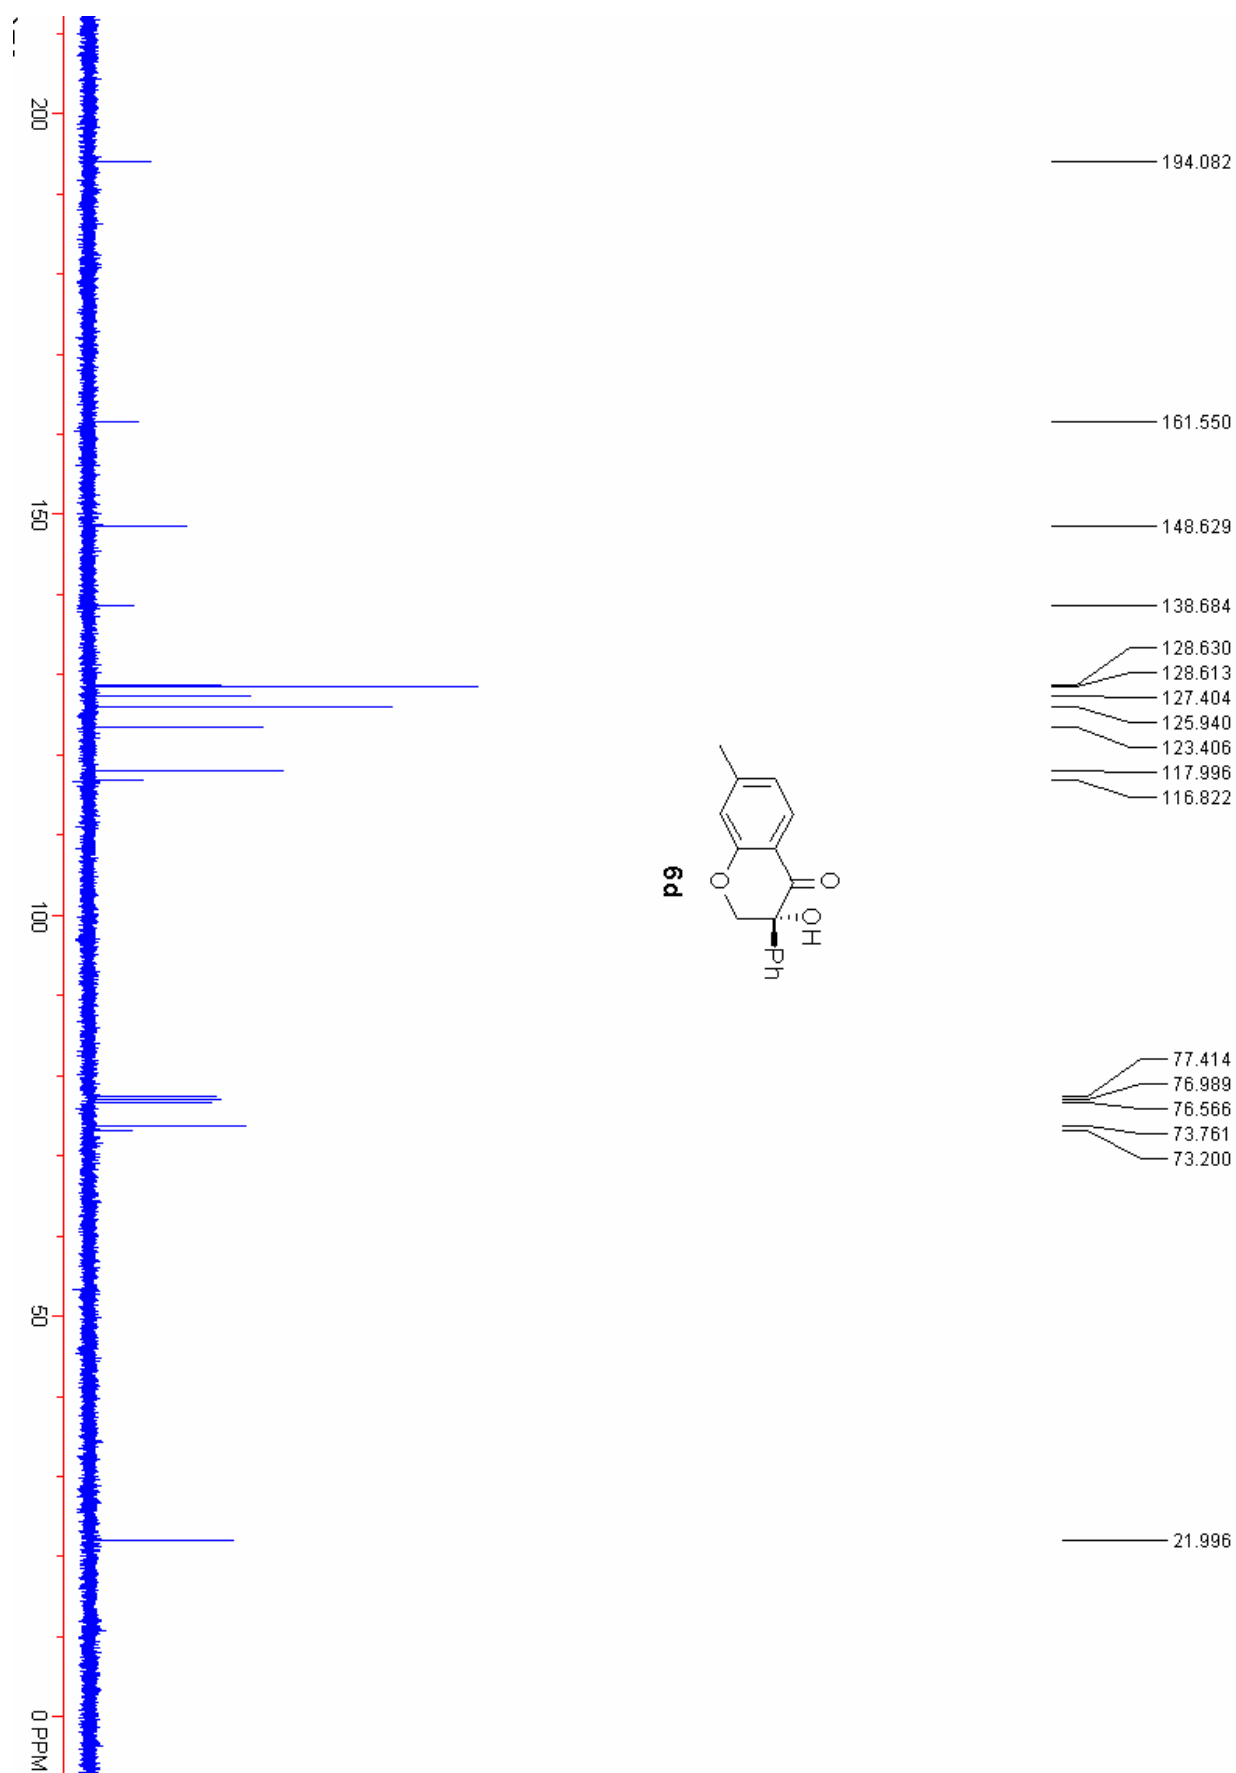

实验时间: 2066-11-07, 12:09:26  
谱图文件: D:\date\ly\样品\ly-4-170000.org

实验者: ly  
报告时间: 2066-11-07, 12:11:33

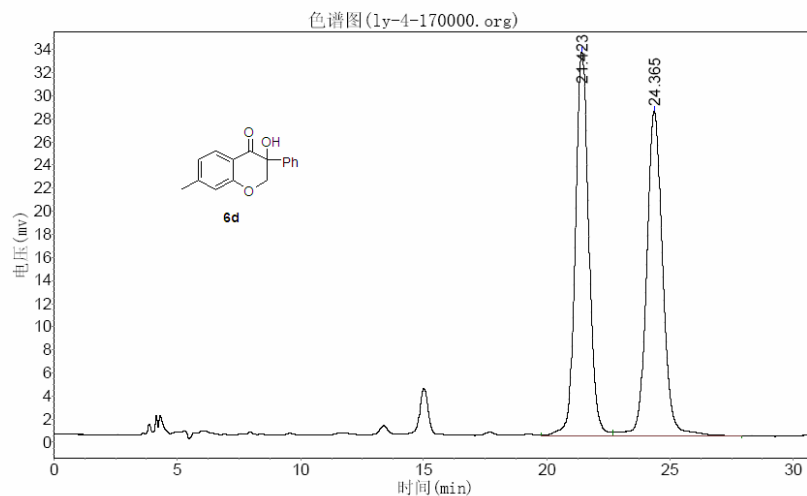

| No. | R. Time | PeakHeight | PeakArea    | PerCent  |
|-----|---------|------------|-------------|----------|
| 1   | 21.423  | 33252.121  | 1265080.625 | 49.7774  |
| 2   | 24.365  | 28119.863  | 1276394.750 | 50.2226  |
| 总计  |         | 61371.984  | 2541475.375 | 100.0000 |

实验时间: 2066-11-07 12:09:26  
实验时间: 2066-11-07, 13:01:59  
谱图文件: D:\date\ly\样品\ly-4-180000.org

实验者: ly  
报告时间: 2066-11-07, 13:47:04

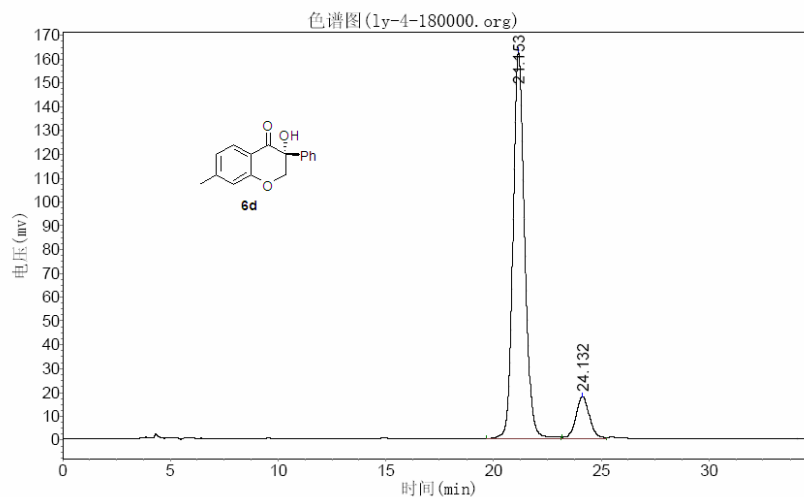

| No. | R. Time | PeakHeight | PeakArea    | PerCent  |
|-----|---------|------------|-------------|----------|
| 1   | 21.153  | 162376.297 | 6095815.500 | 88.7660  |
| 2   | 24.132  | 17508.912  | 771472.625  | 11.2340  |
| 总计  |         | 179885.209 | 6867288.125 | 100.0000 |

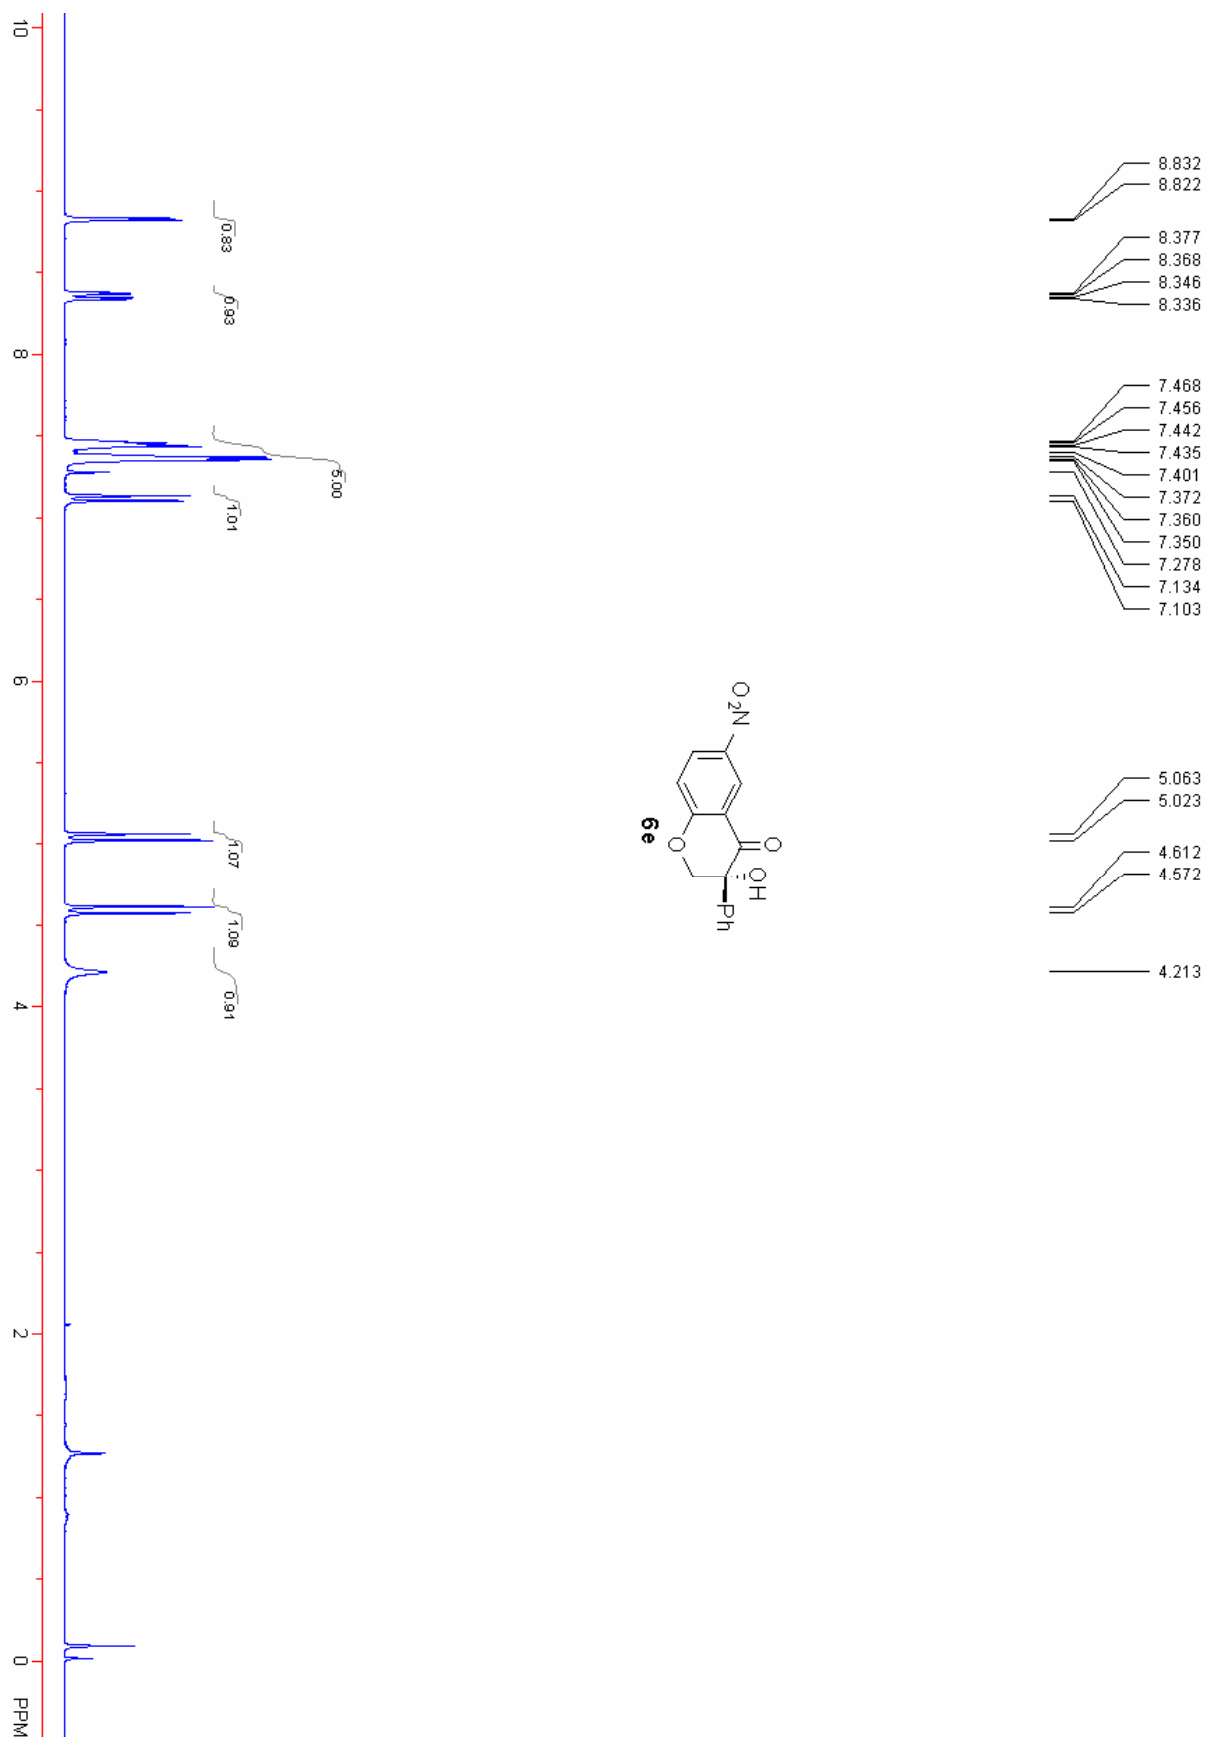

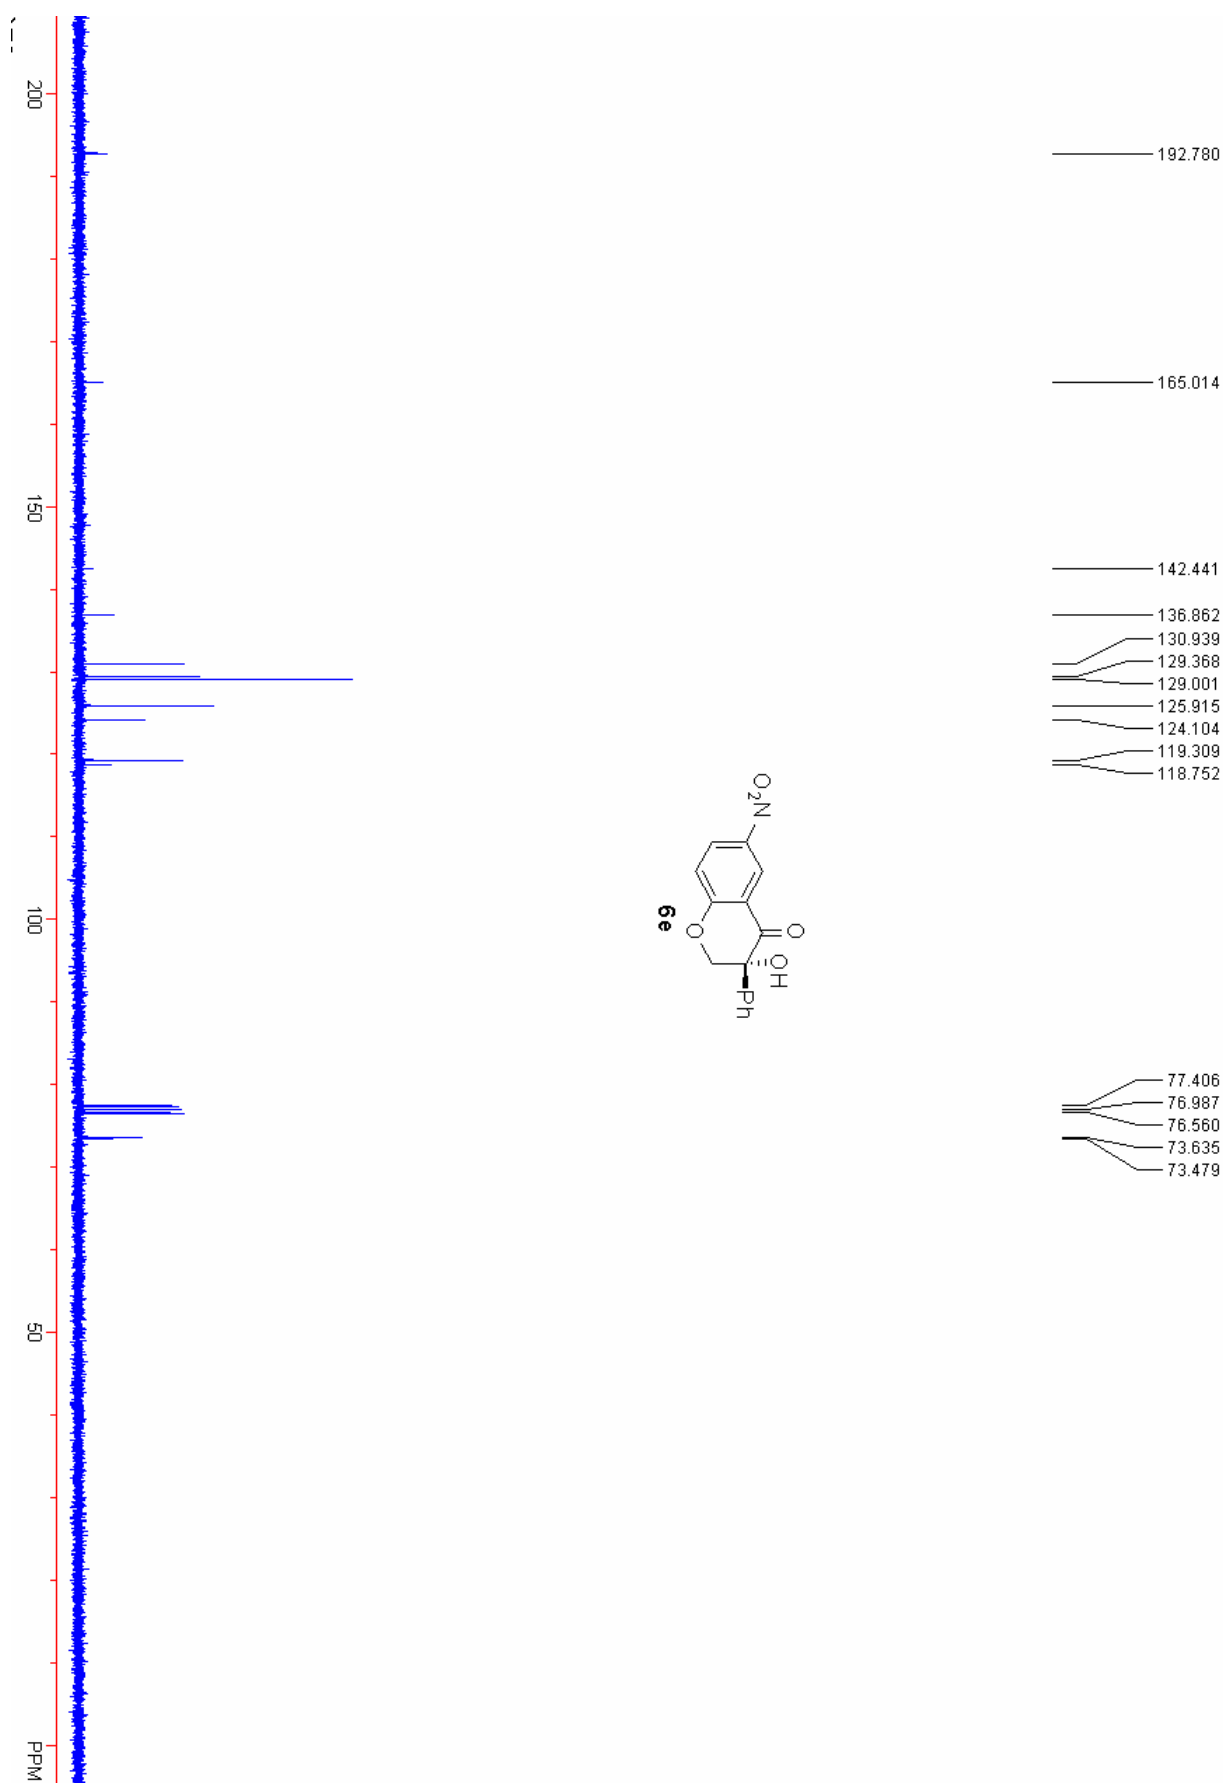

谱图文件:D:\date\ly\样品\ly-N02-rac-20000. org

报告时间: 2066-12-20, 15:42:16  
积分方法: 面积归一法

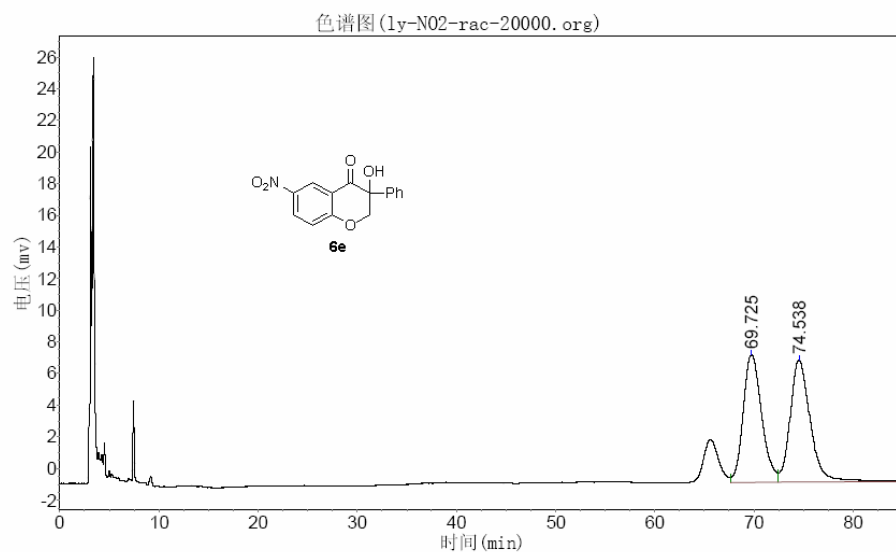

| No. | R. Time | PeakHeight | PeakArea    | PerCent  |
|-----|---------|------------|-------------|----------|
| 1   | 69.725  | 8066.171   | 1041452.188 | 48.7254  |
| 2   | 74.538  | 7725.981   | 1095938.875 | 51.2746  |
| 总计  |         | 15792.152  | 2137391.063 | 100.0000 |

实验时间: 2066-11-30, 12:10:18

谱图文件:D:\date\ly\样品\ly-4-240000. org

实验者: liyi

报告时间: 2066-11-30, 12:11:54

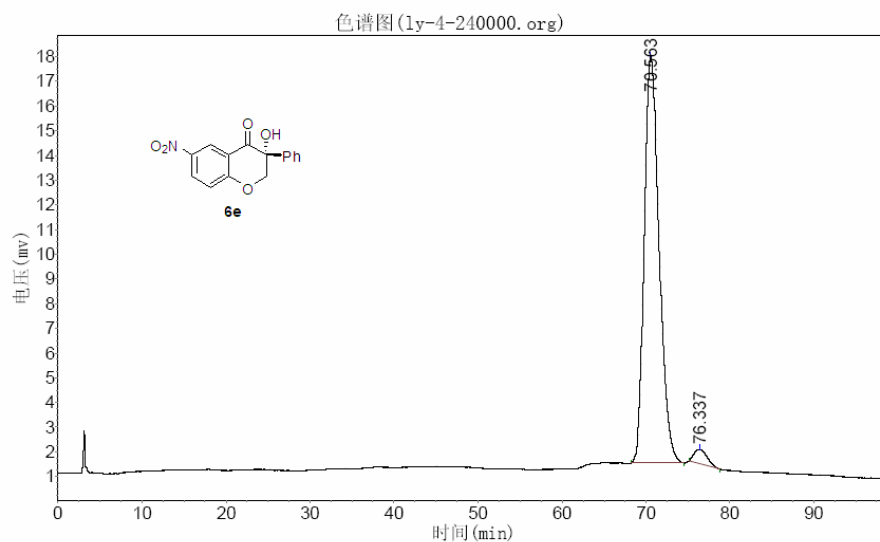

| No. | R. Time | PeakHeight | PeakArea    | PerCent  |
|-----|---------|------------|-------------|----------|
| 1   | 70.563  | 16450.930  | 2032654.125 | 96.9959  |
| 2   | 76.337  | 583.583    | 62953.688   | 3.0041   |
| 总计  |         | 17034.513  | 2095607.813 | 100.0000 |

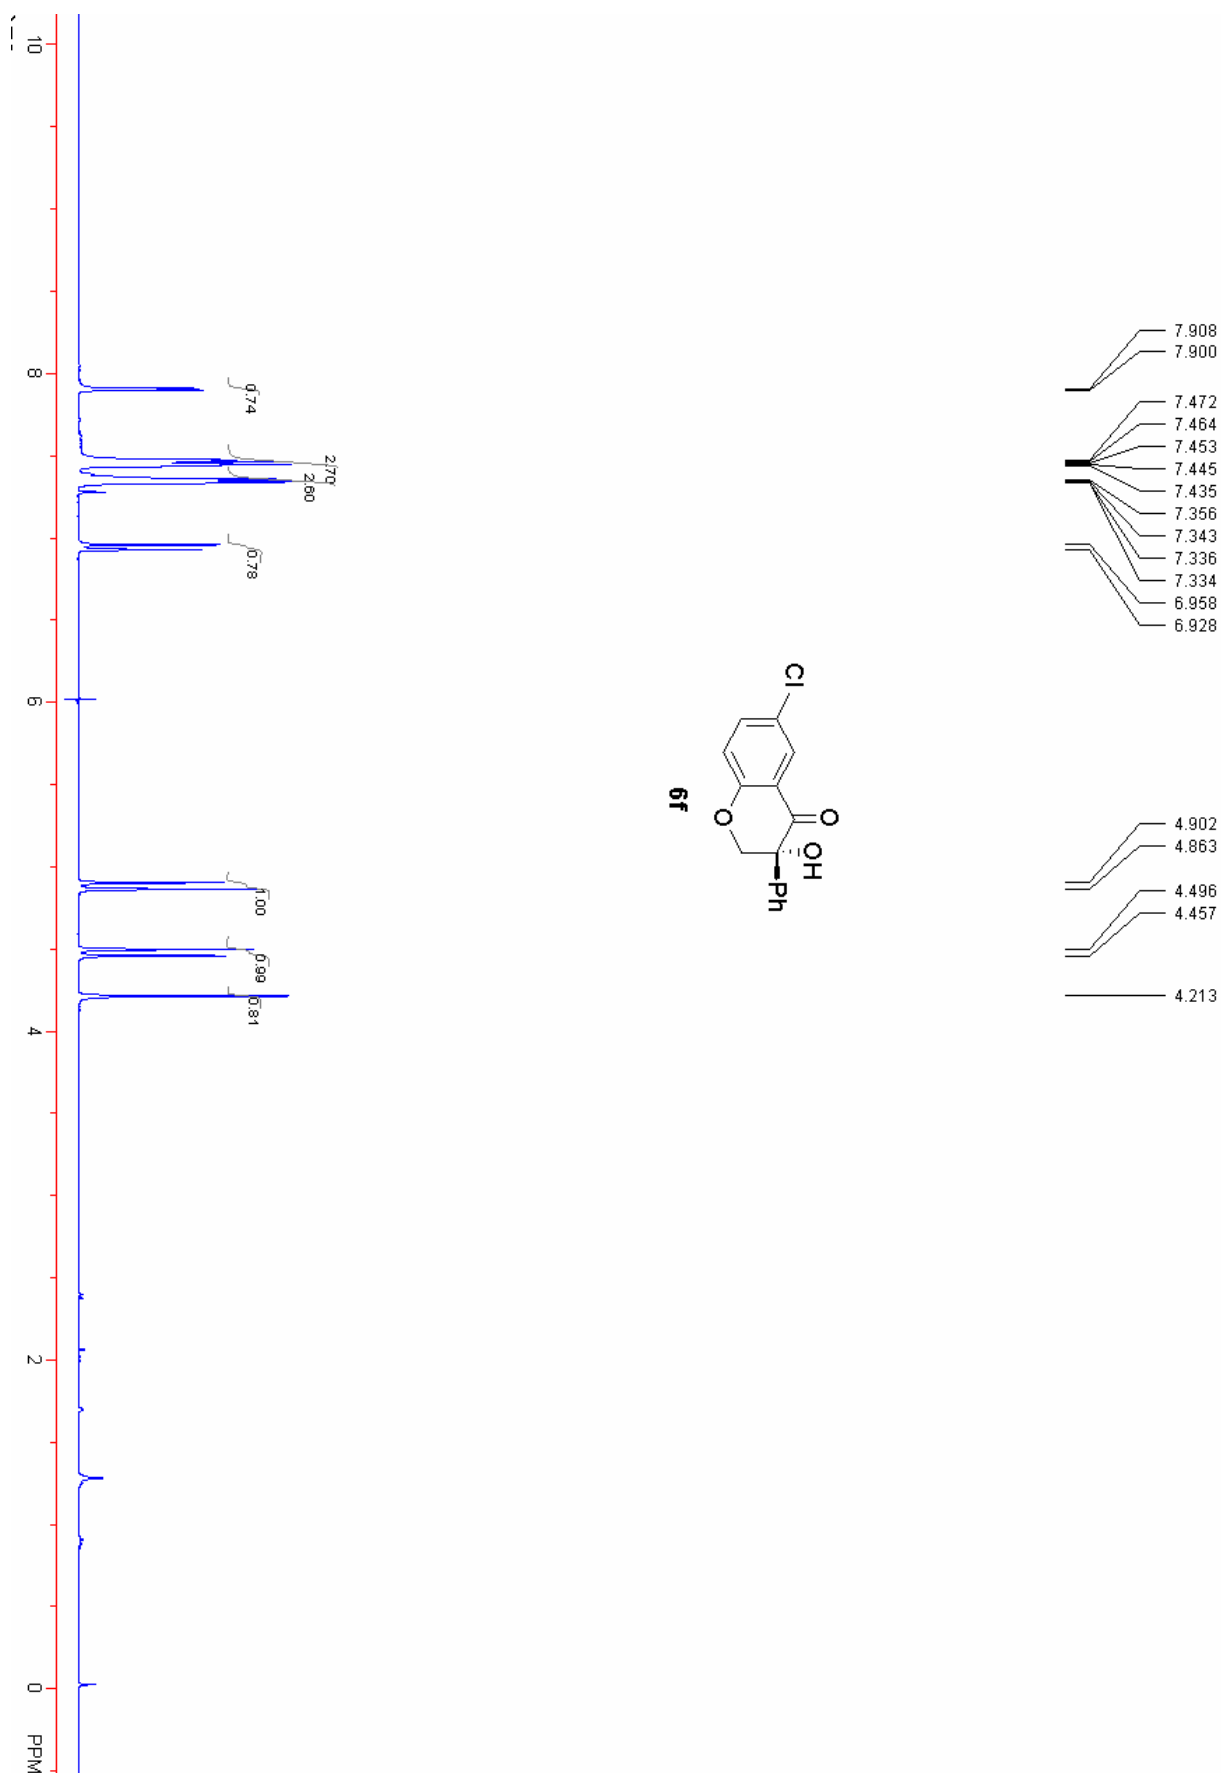

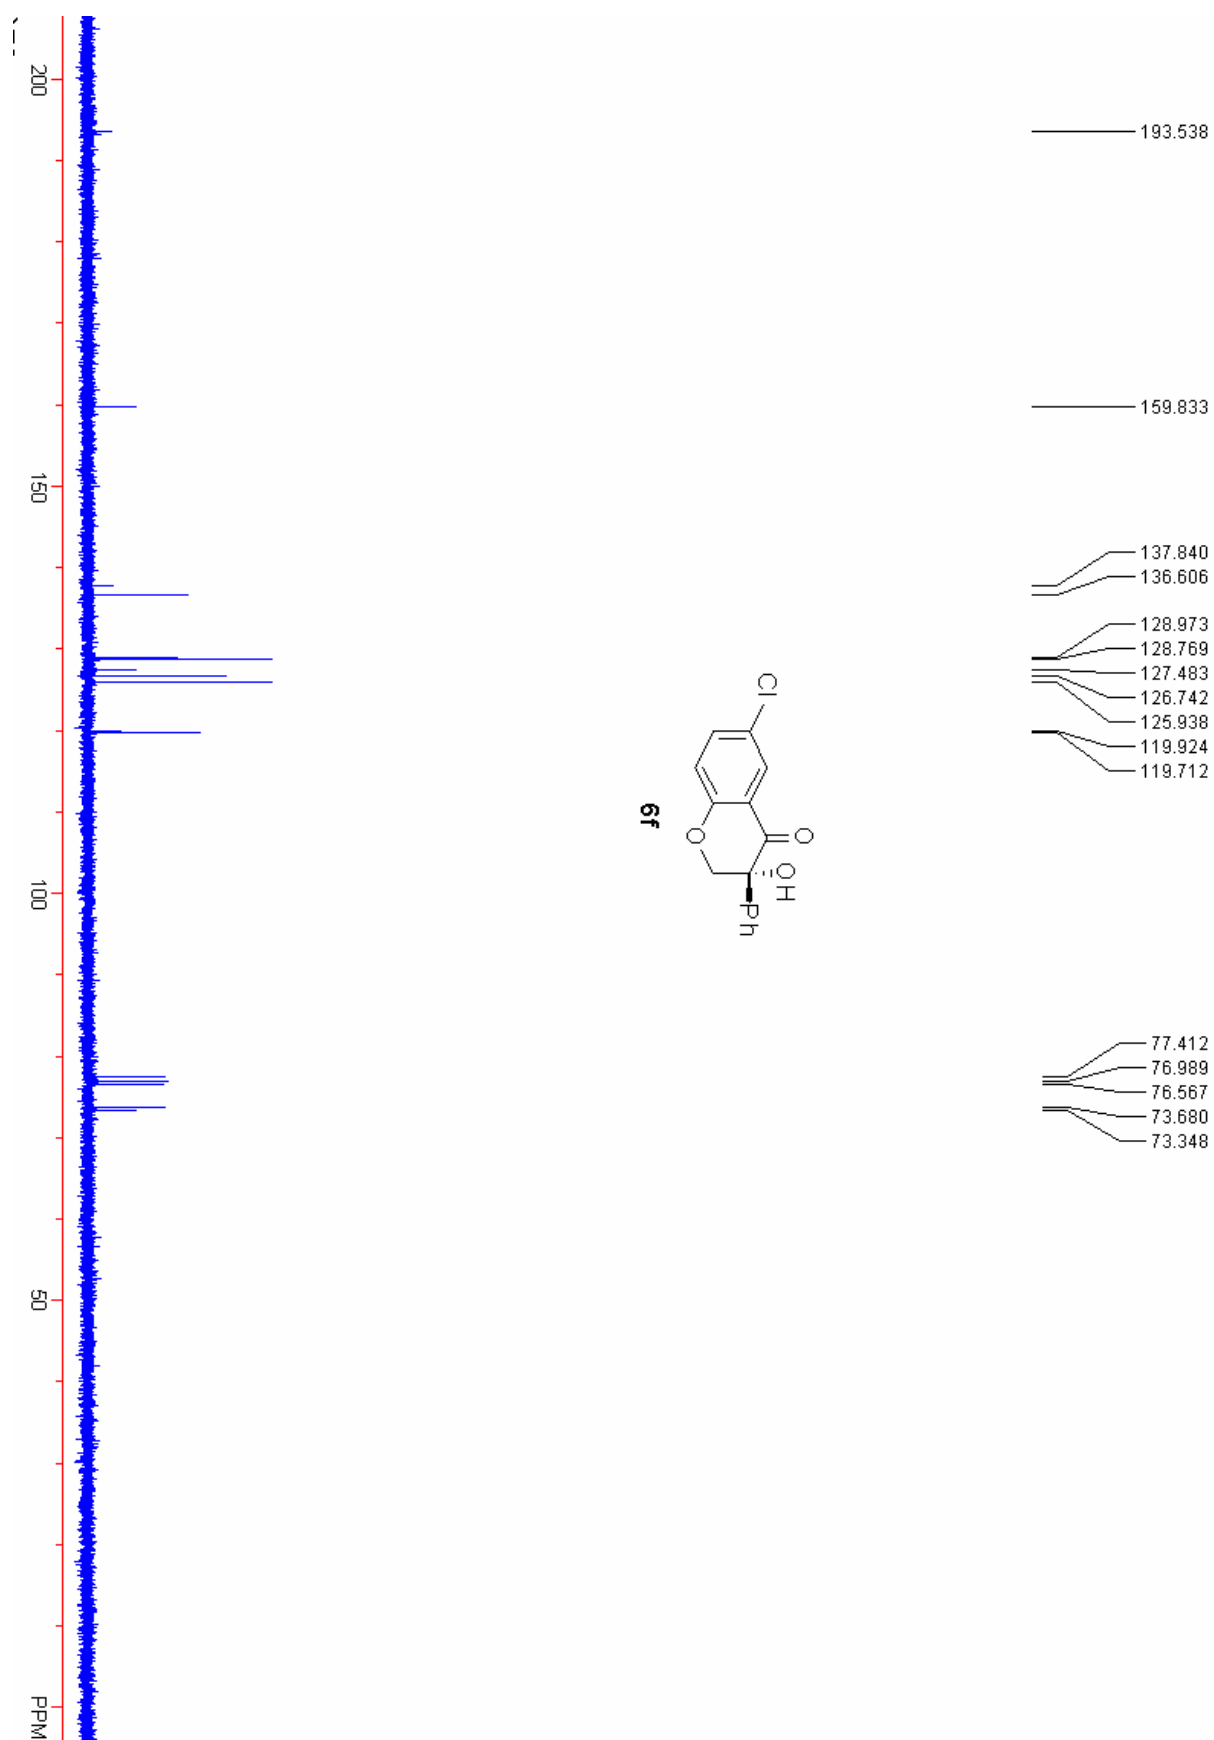

实验时间: 2066-11-30, 15:15:34  
谱图文件: D:\date\ly\样品\ly-4-30-071130rac0000. org

实验者: liyi  
报告时间: 2066-11-30, 15:17:12

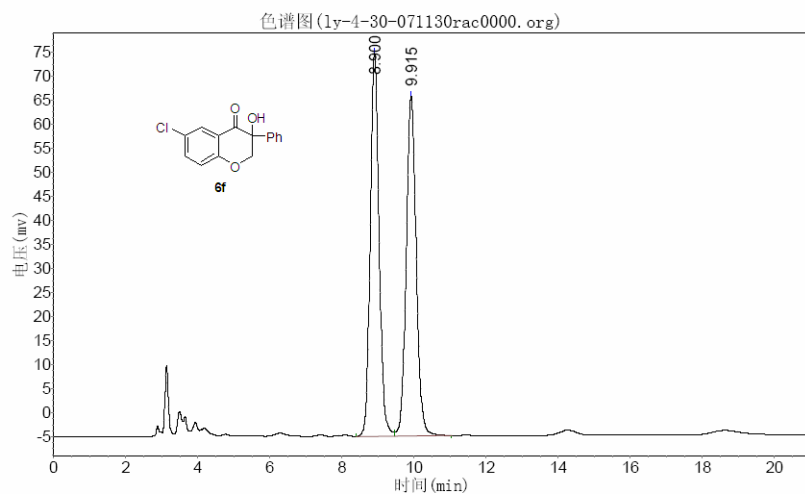

| No. | R. Time | PeakHeight | PeakArea    | PerCent  |
|-----|---------|------------|-------------|----------|
| 1   | 8.900   | 79883.523  | 1361480.625 | 49.9449  |
| 2   | 9.915   | 70743.773  | 1364483.875 | 50.0551  |
| 总计  |         | 150627.297 | 2725964.500 | 100.0000 |

实验时间: 2066-11-30, 15:55:19  
谱图文件: D:\date\ly\样品\ly-4-310000. org

实验者: liyi  
报告时间: 2066-11-30, 16:08:12

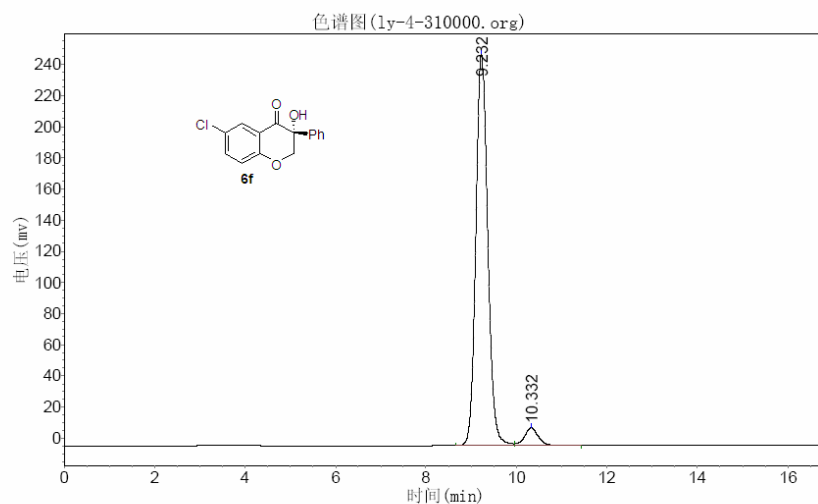

| No. | R. Time | PeakHeight | PeakArea    | PerCent  |
|-----|---------|------------|-------------|----------|
| 1   | 9.232   | 251650.609 | 4573684.500 | 94.8920  |
| 2   | 10.332  | 11406.304  | 246200.156  | 5.1080   |
| 总计  |         | 263056.913 | 4819884.656 | 100.0000 |

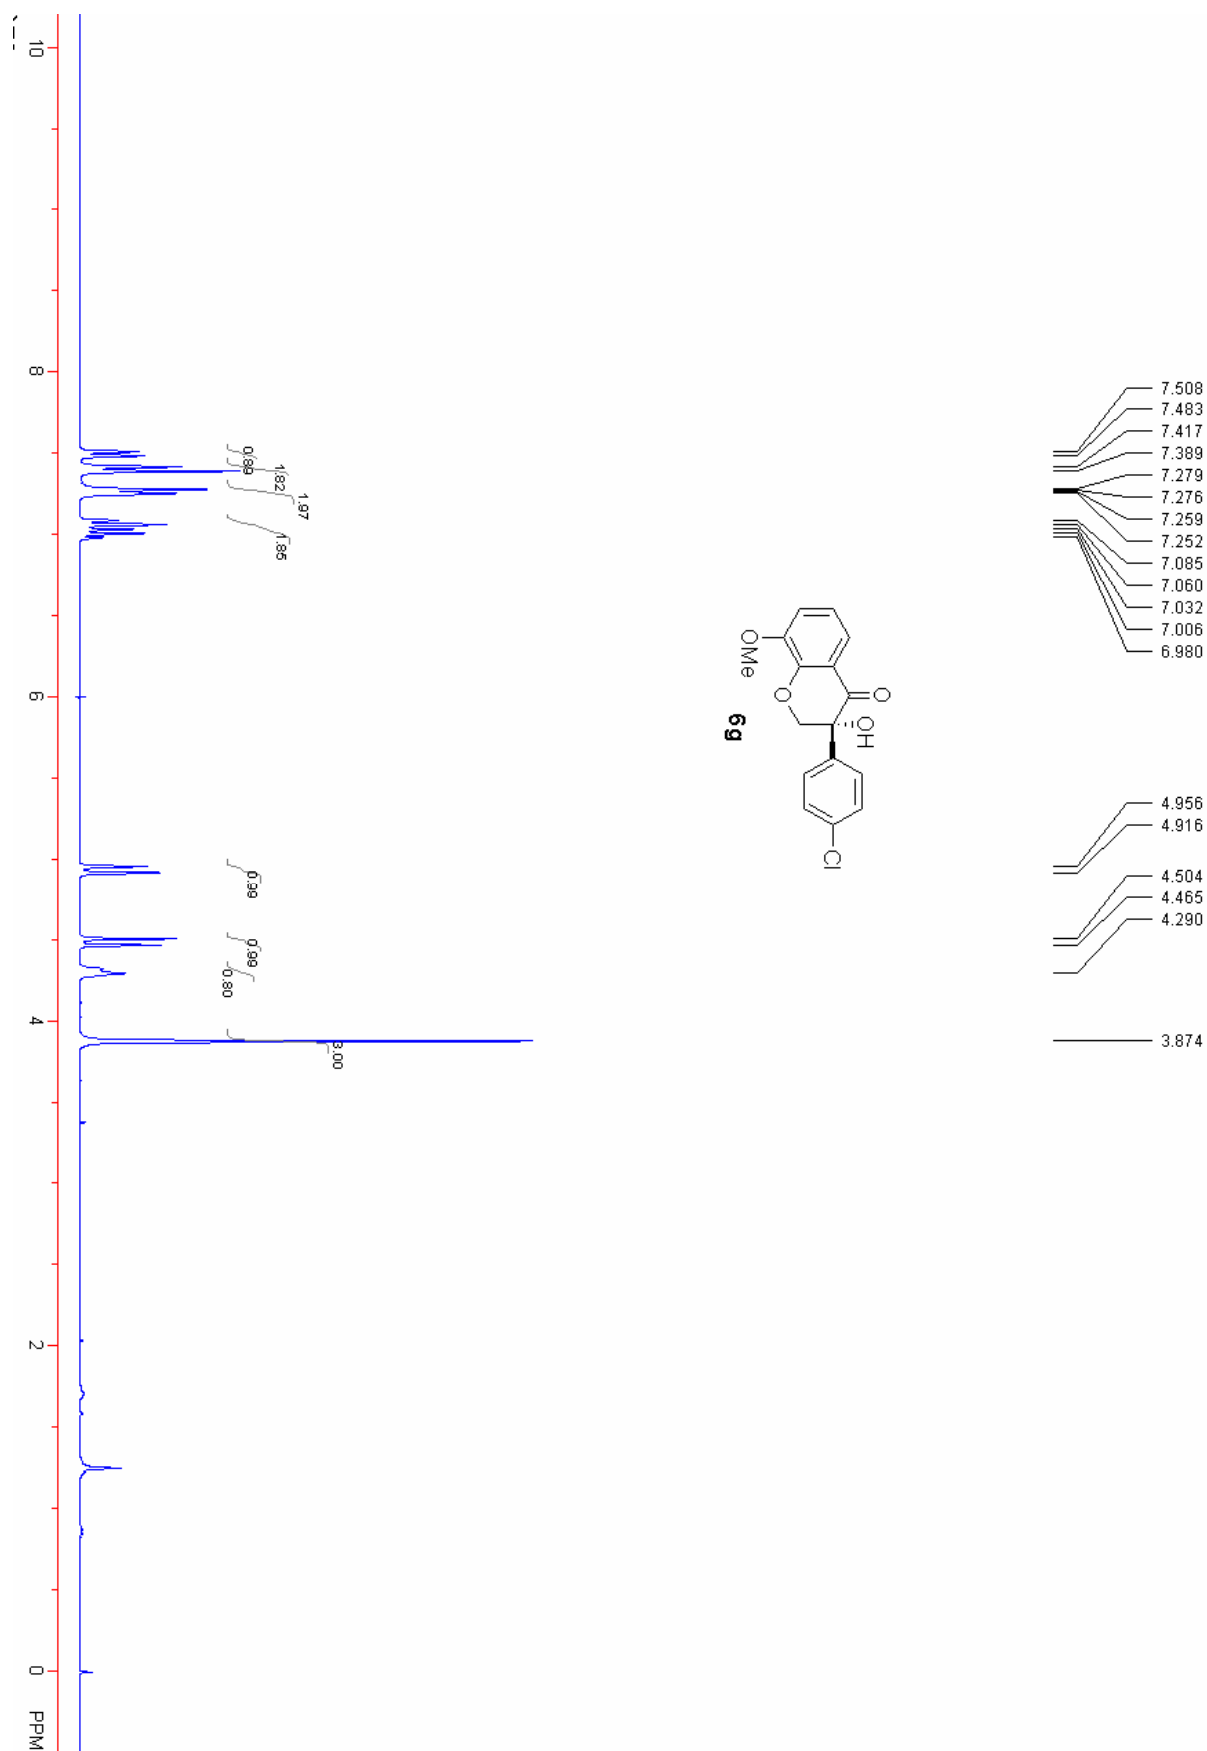

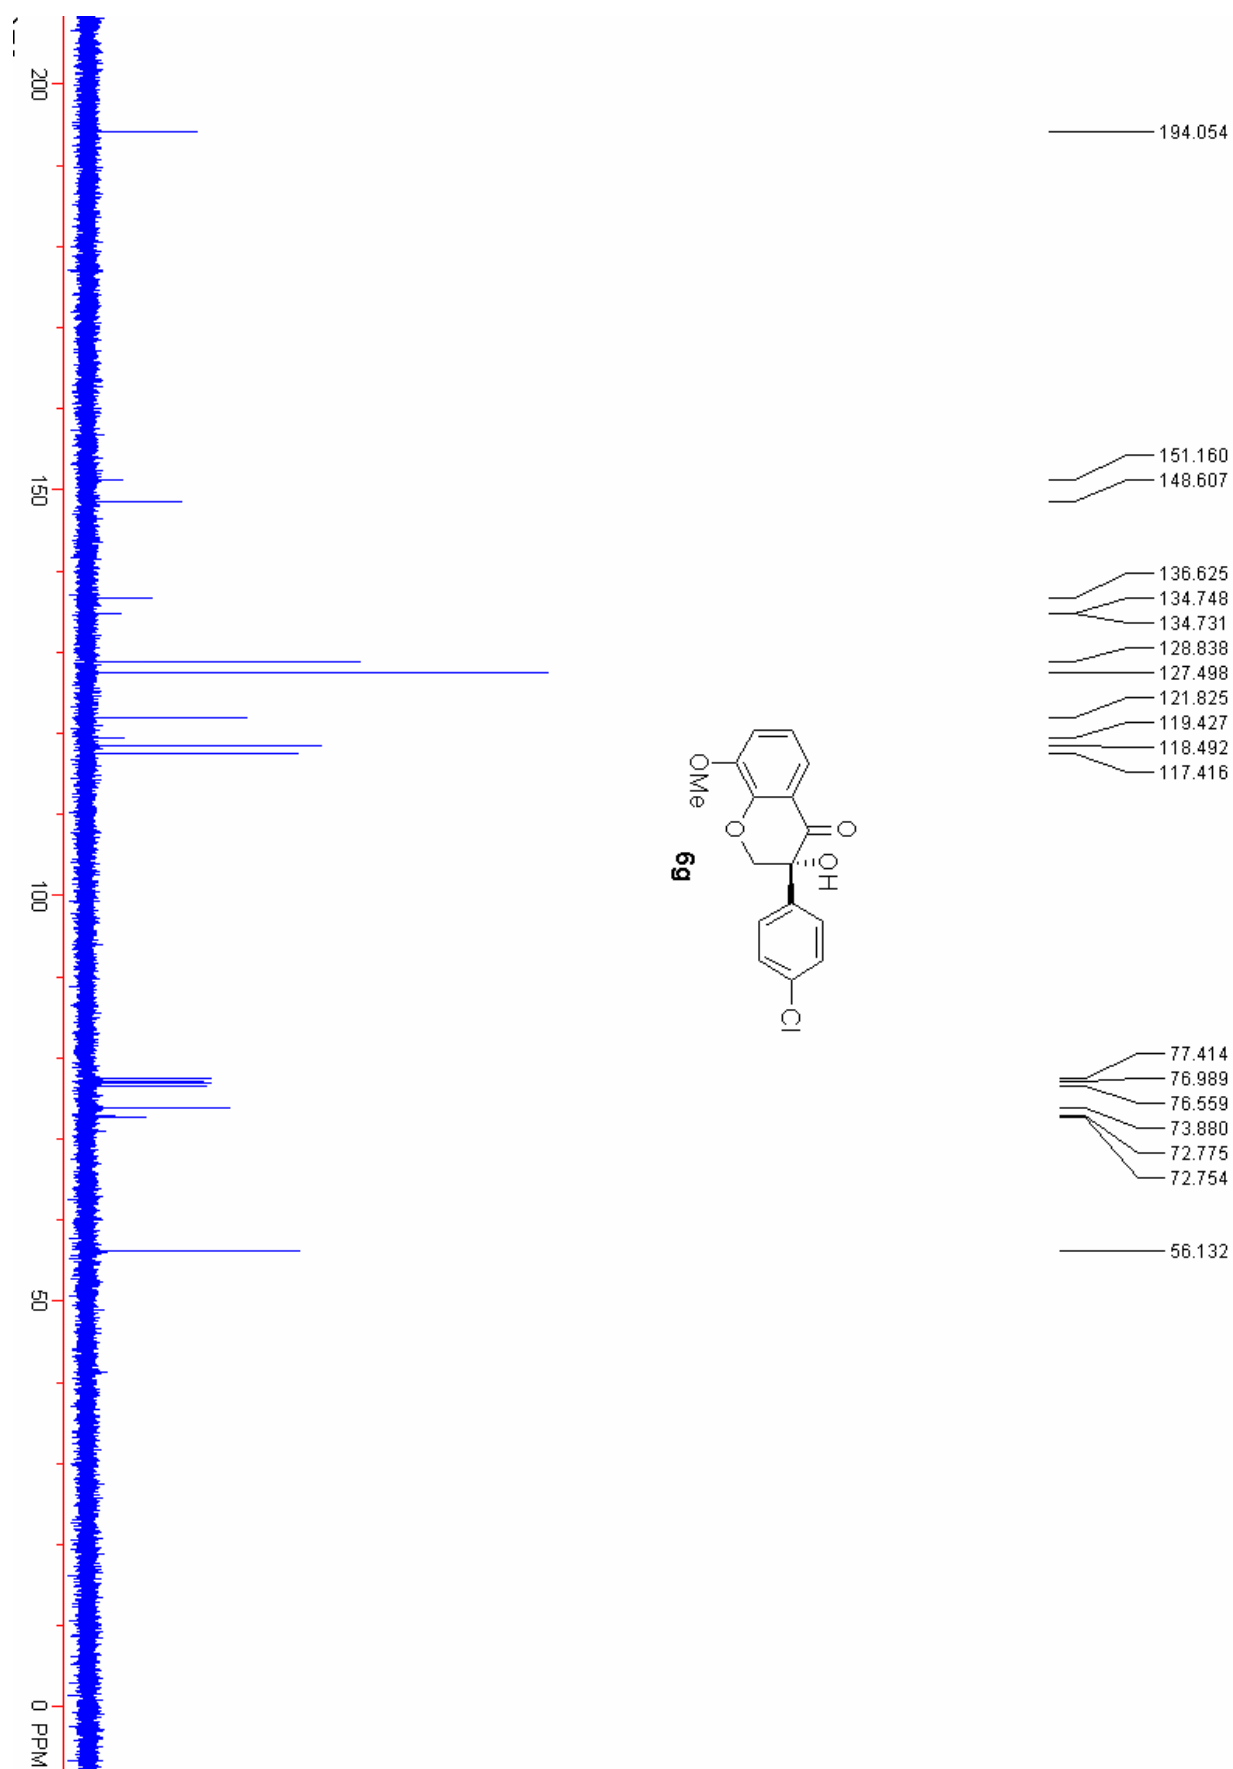

实验时间: 2066-11-16, 17:00:13  
谱图文件: D:\date\ly\样品\ly-4-23rac0001.org

实验者: ly  
报告时间: 2066-11-16, 17:53:46

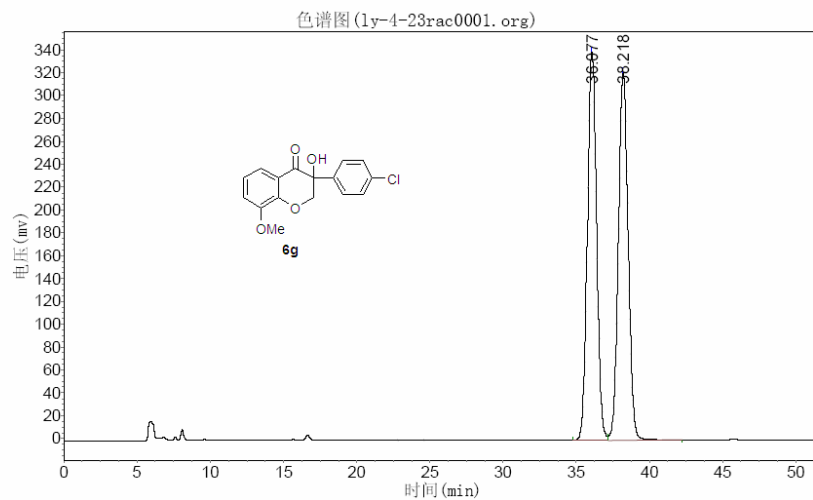

| No. | R. Time | PeakHeight | PeakArea     | PerCent  |
|-----|---------|------------|--------------|----------|
| 1   | 36.077  | 340200.094 | 14889927.000 | 49.7251  |
| 2   | 38.218  | 321910.063 | 15054571.000 | 50.2749  |
| 总计  |         | 662110.156 | 29944498.000 | 100.0000 |

实验时间: 2066-11-16, 19:13:29  
谱图文件: D:\date\ly\样品\ly-4-260000.org

实验者: ly  
报告时间: 2066-11-16, 19:17:44

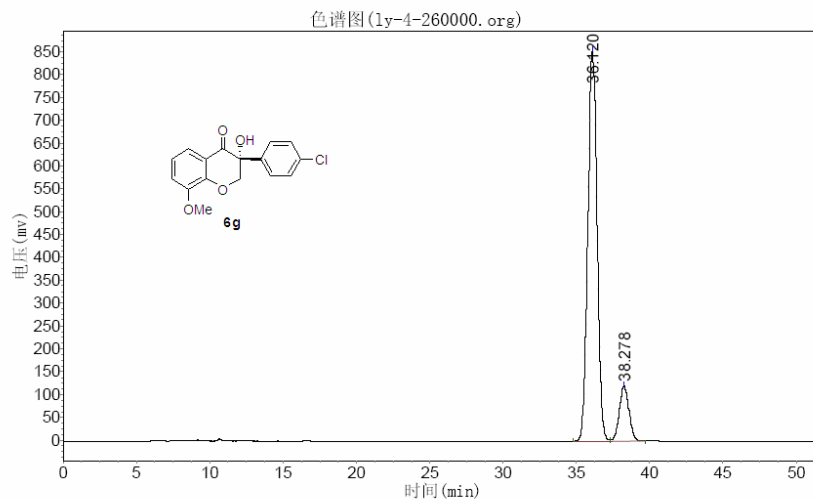

| No. | R. Time | PeakHeight | PeakArea     | PerCent  |
|-----|---------|------------|--------------|----------|
| 1   | 36.120  | 854128.000 | 37443528.000 | 87.1682  |
| 2   | 38.278  | 120049.547 | 5511970.000  | 12.8318  |
| 总计  |         | 974177.547 | 42955498.000 | 100.0000 |

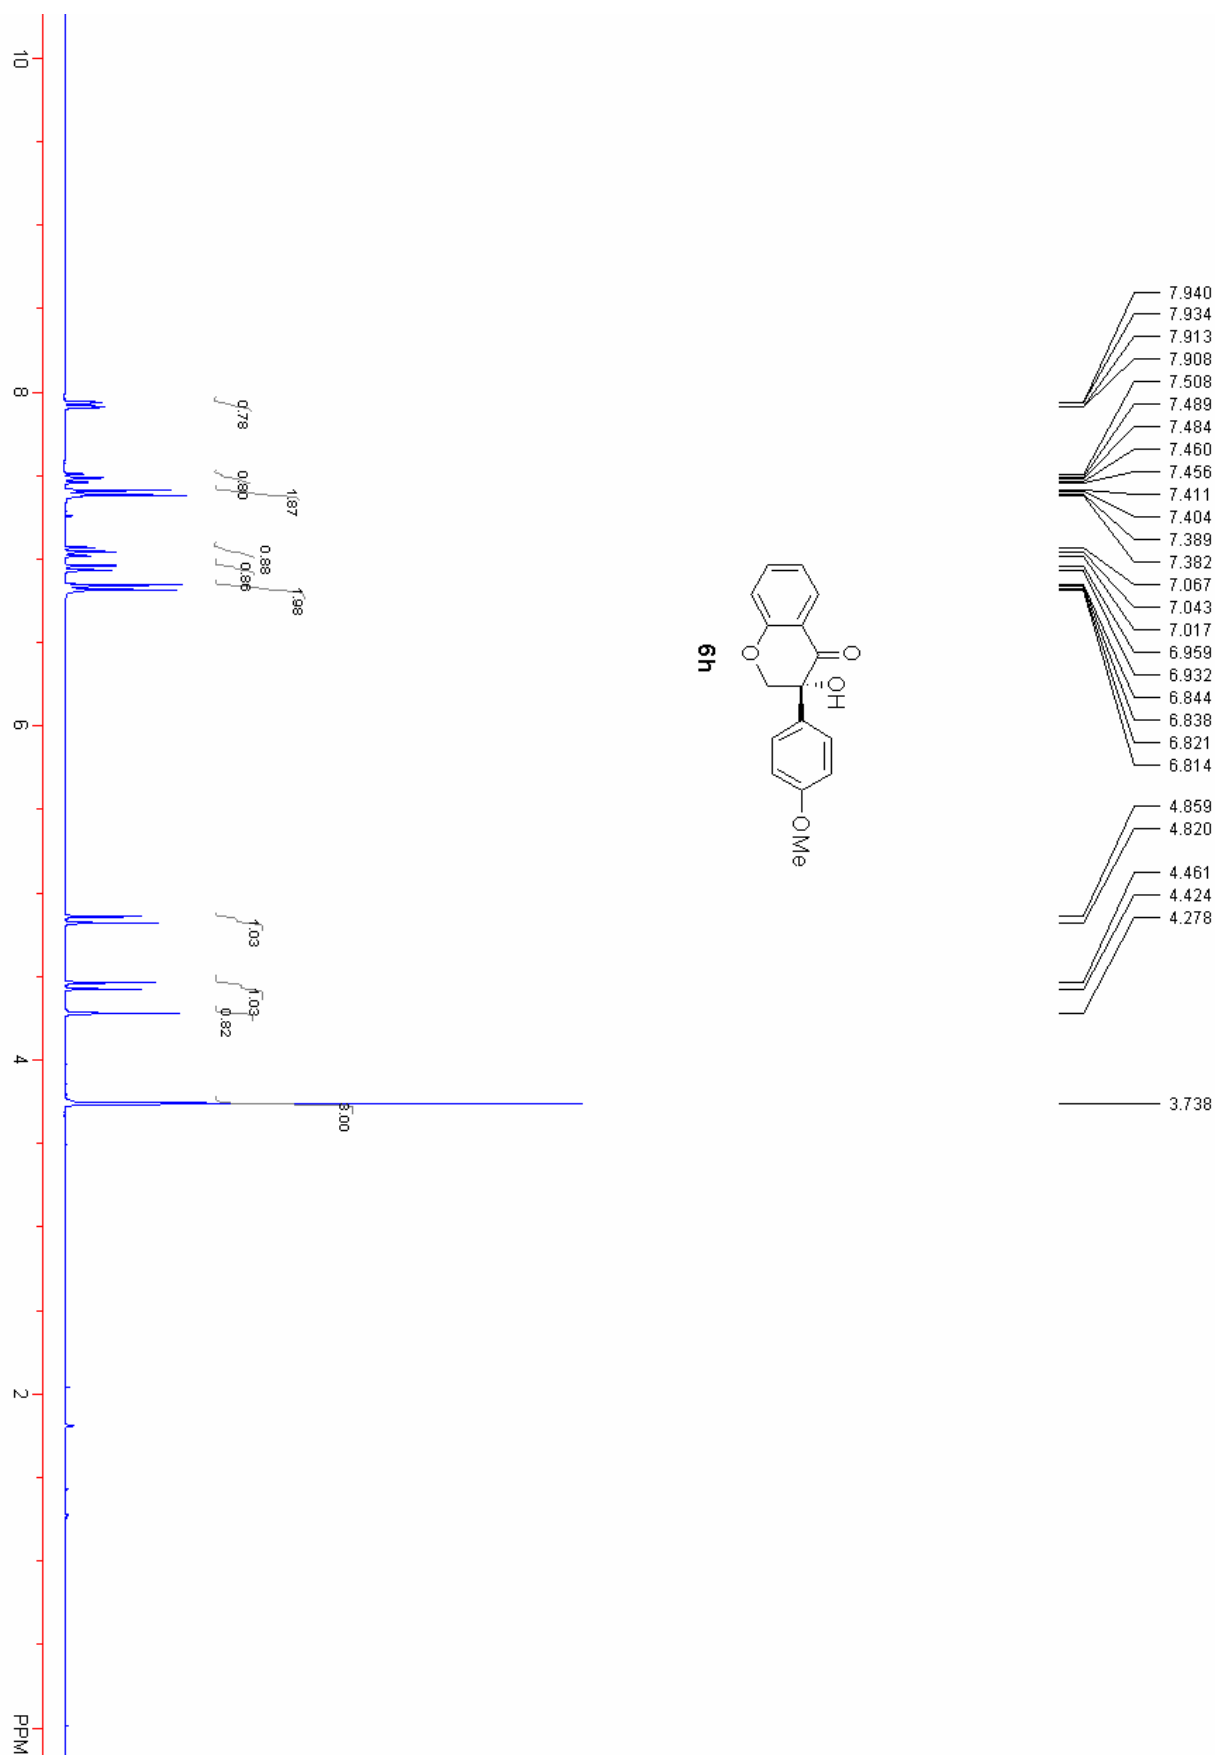

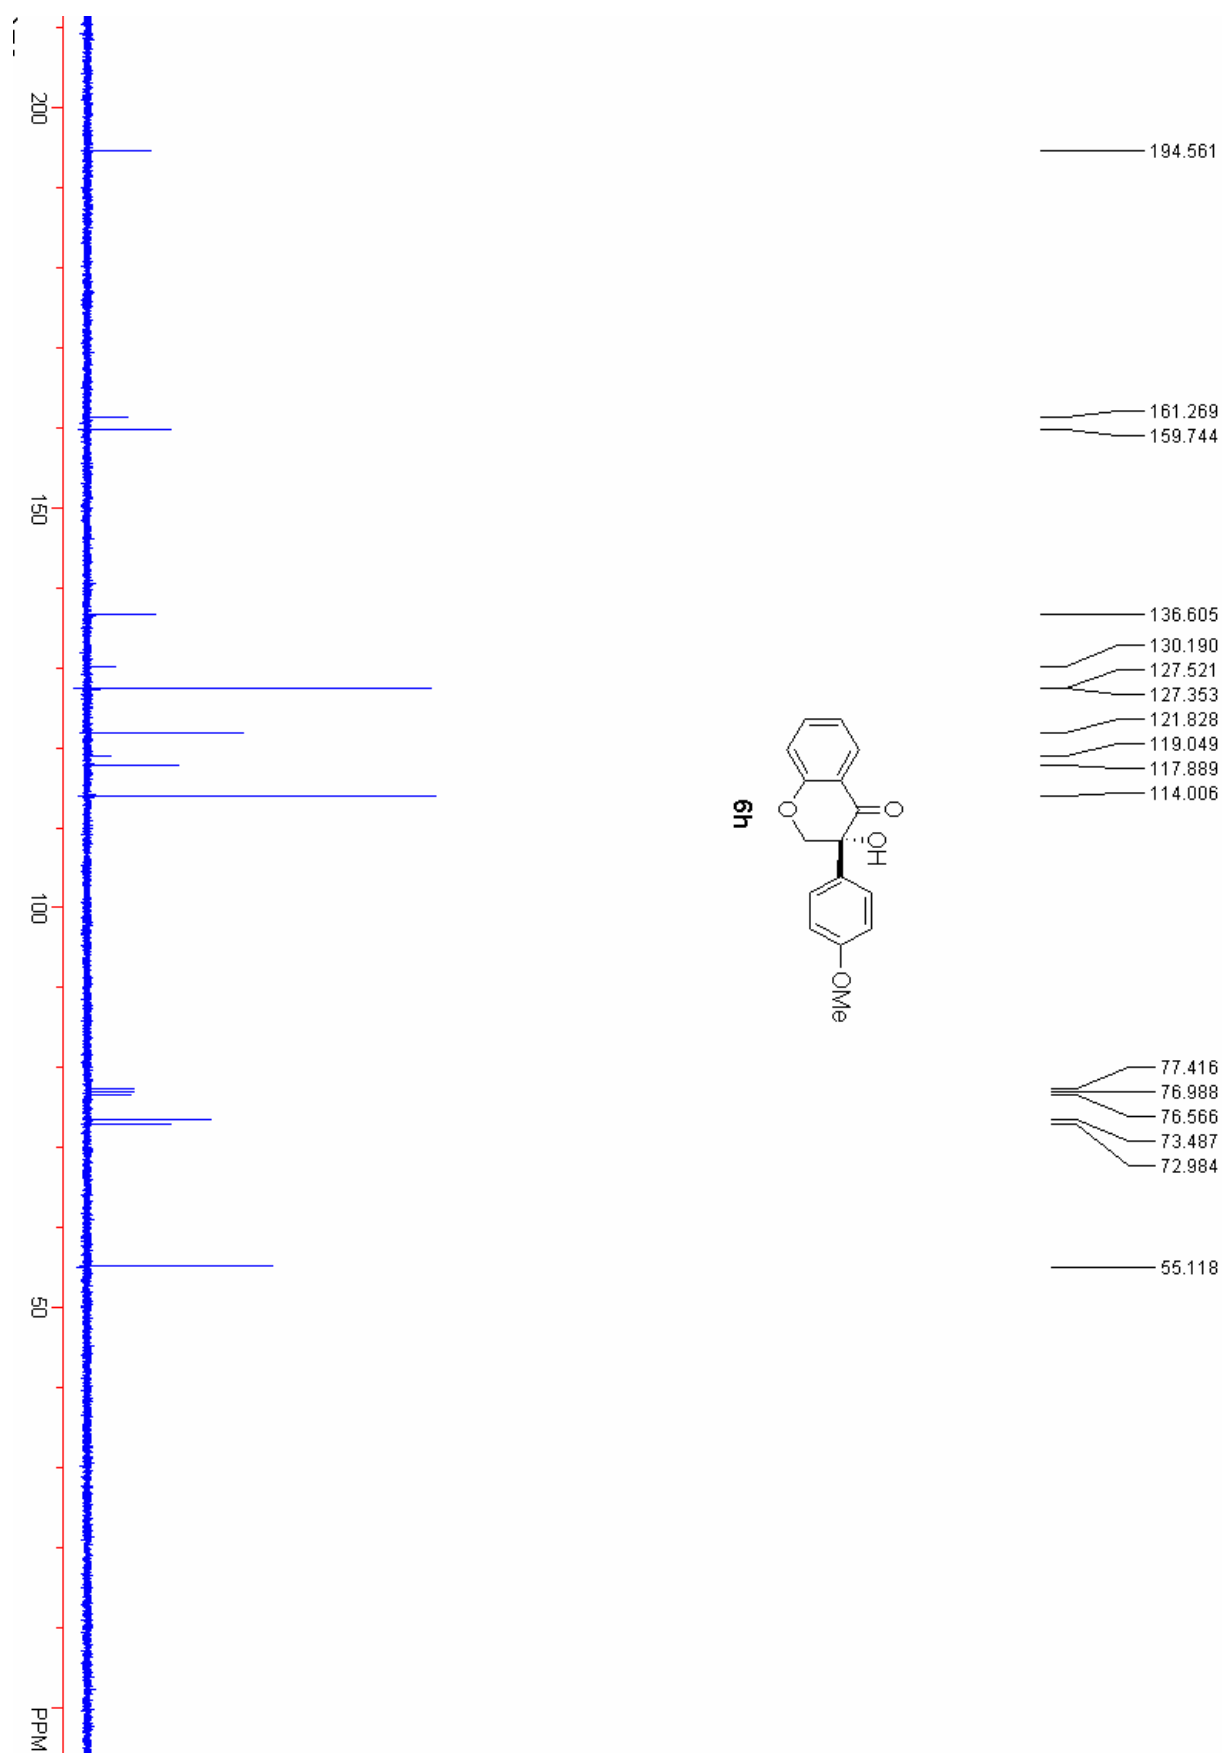

样品名称:分析谱图  
分析日期:2007-10-23  
色谱柱:  
流速:

样品文件名:3-78. che  
分析时间:10:00  
流动相:  
检测波长:

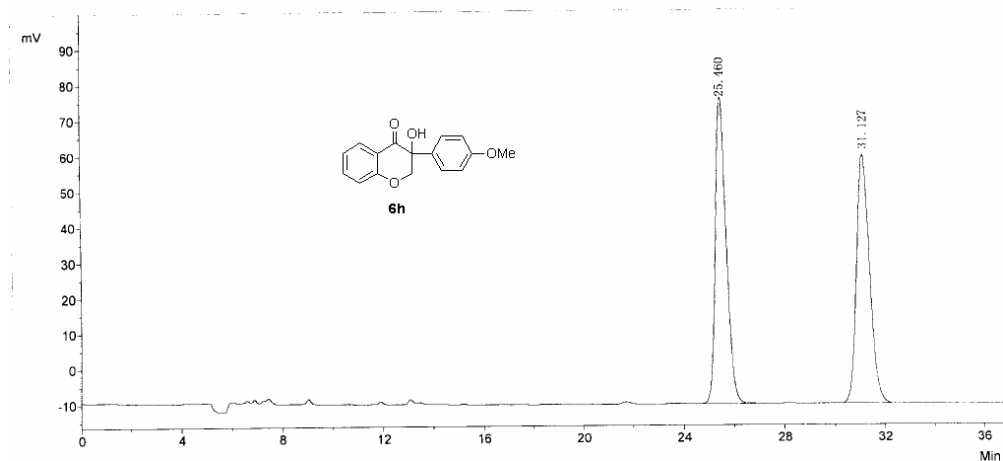

| No.   | PeakNo | R. Time | PeakHeight | PeakArea  | PerCent  |
|-------|--------|---------|------------|-----------|----------|
| 1     | 1      | 25.460  | 84451.4    | 2530307.5 | 49.9939  |
| 2     | 2      | 31.127  | 69722.1    | 2530921.1 | 50.0061  |
| Total |        |         | 154173.5   | 5061228.6 | 100.0000 |

样品名称:分析谱图  
分析日期:2007-10-23  
色谱柱:  
流速:

样品文件名:3-79. che  
分析时间:11:16  
流动相:  
检测波长:

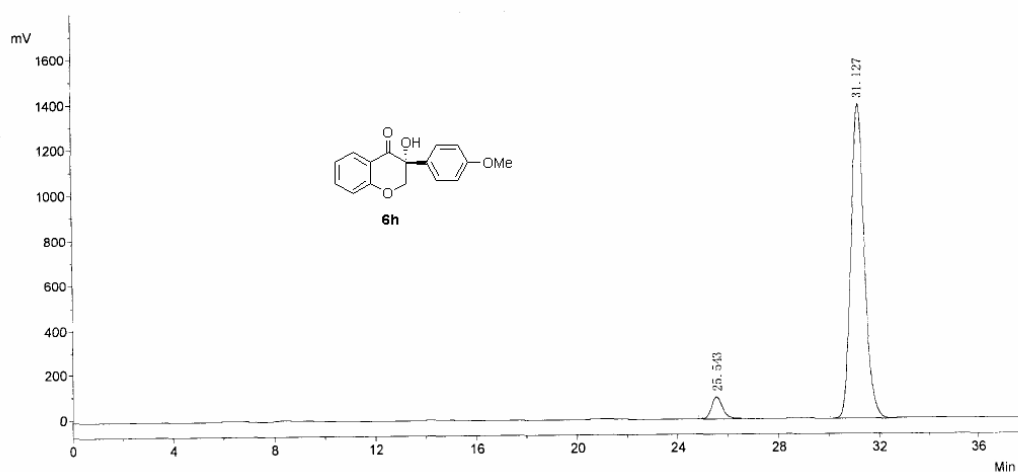

| No.   | PeakNo | R. Time | PeakHeight | PeakArea   | PerCent  |
|-------|--------|---------|------------|------------|----------|
| 1     | 1      | 25.543  | 95376.0    | 2881659.4  | 5.2274   |
| 2     | 2      | 31.127  | 1387070.0  | 52244432.9 | 94.7726  |
| Total |        |         | 1482446.0  | 55126092.3 | 100.0000 |

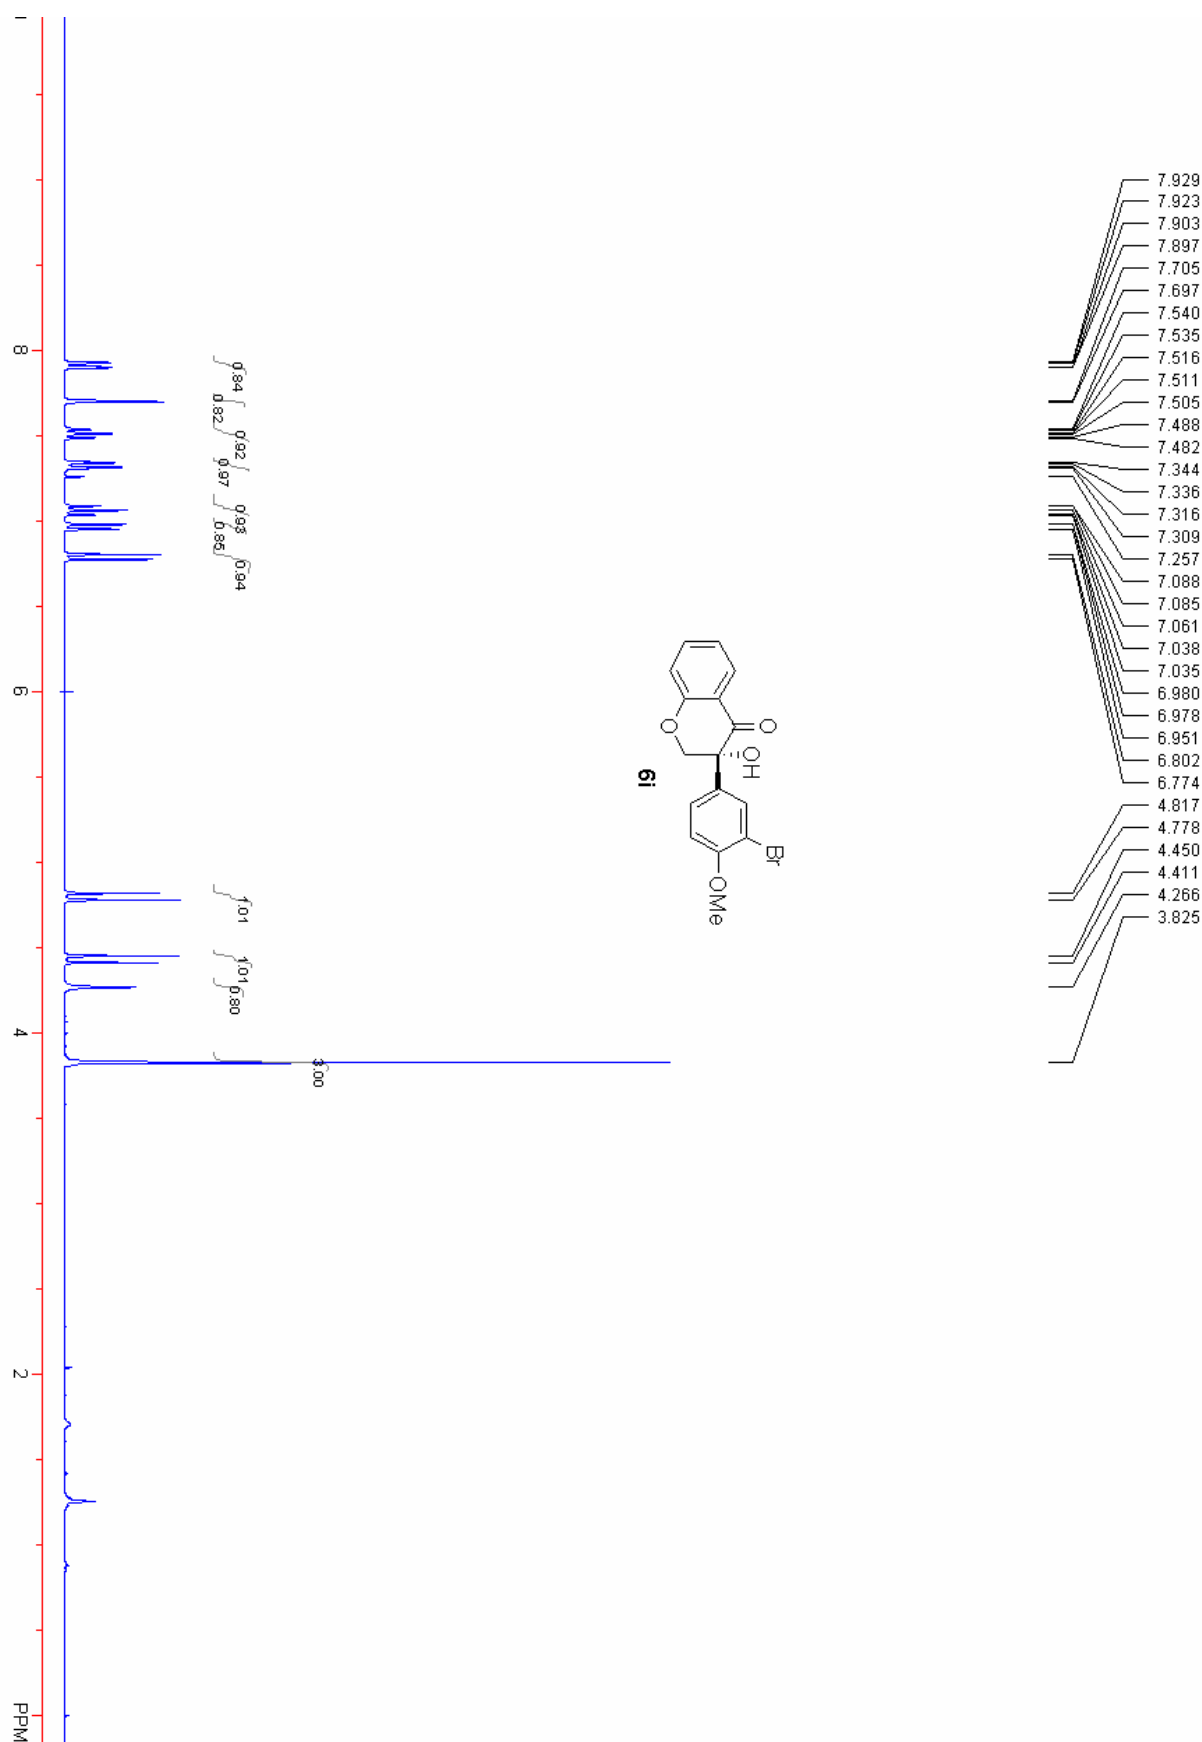

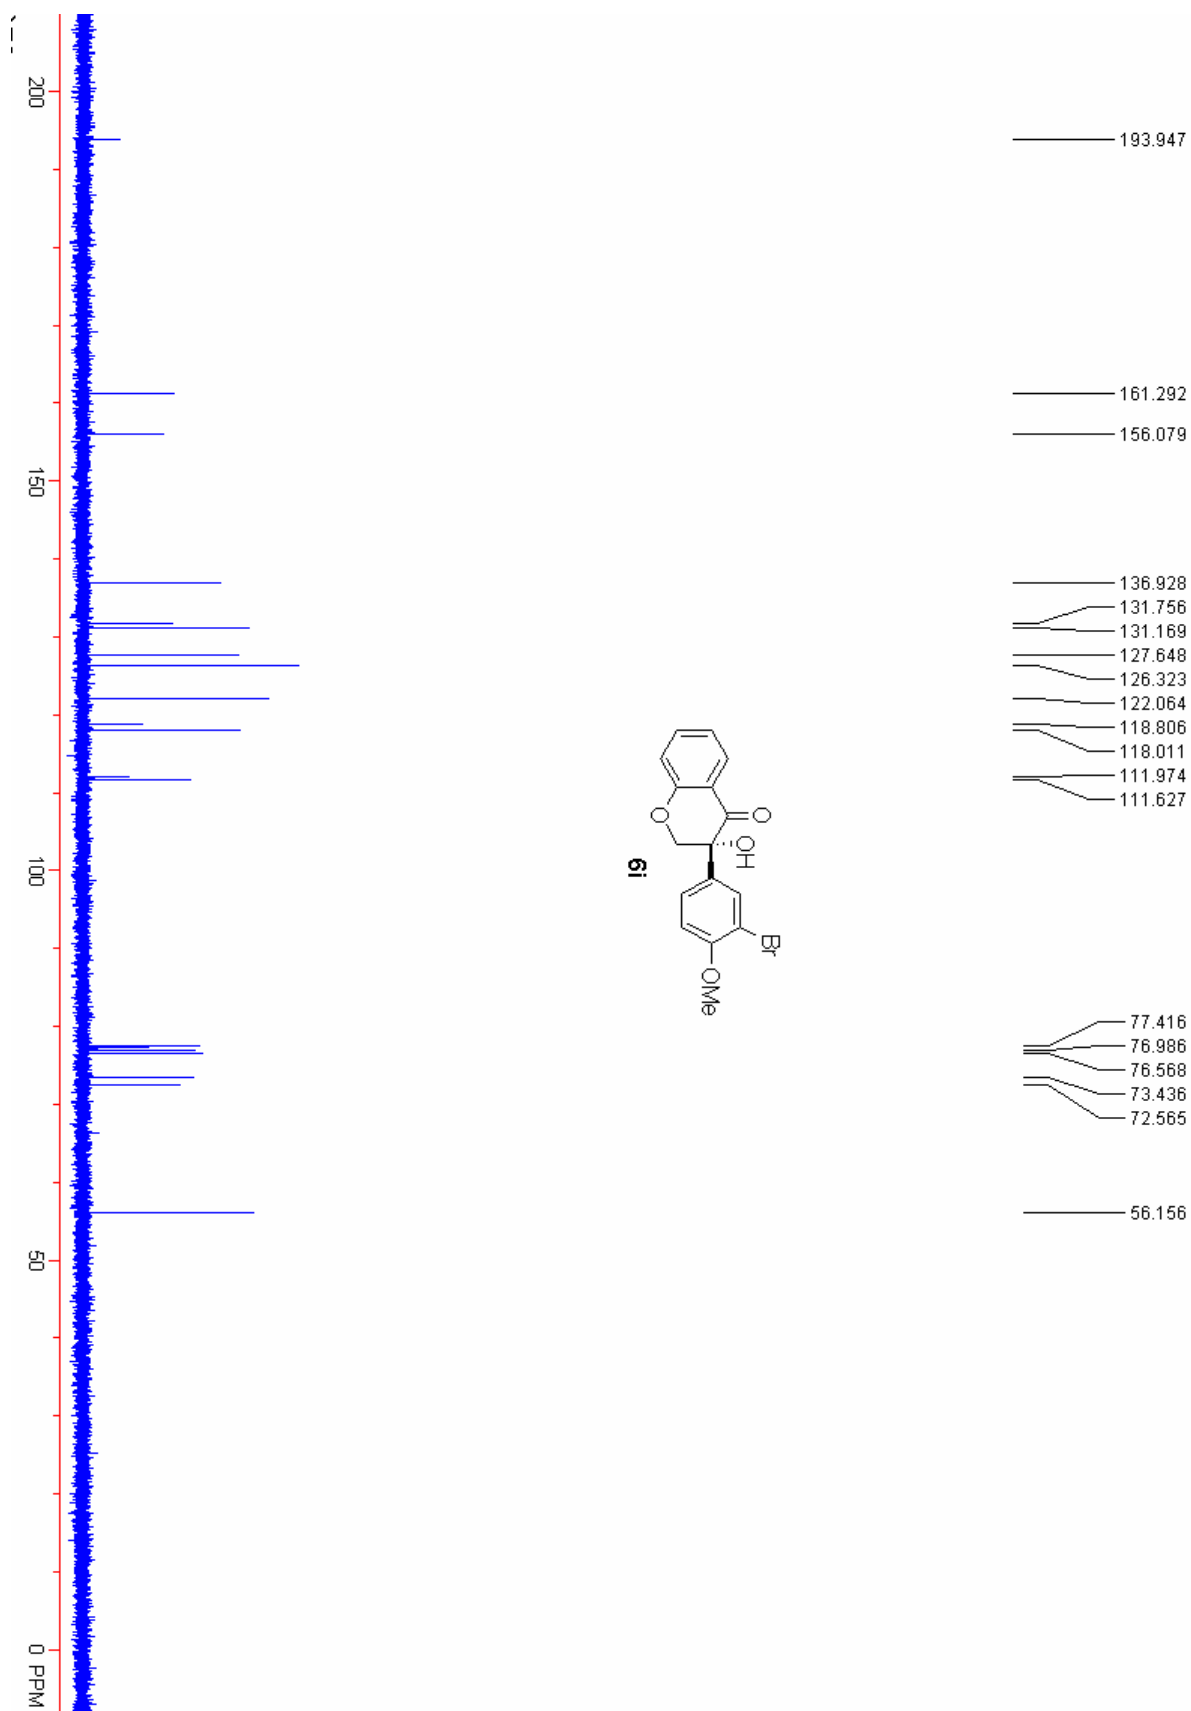

实验时间: 2066-10-24, 9:30:49  
谱图文件:D:\date\ly\样品\ly-3-98rac0000.org

实验者: ly  
报告时间: 2066-10-24, 9:43:25

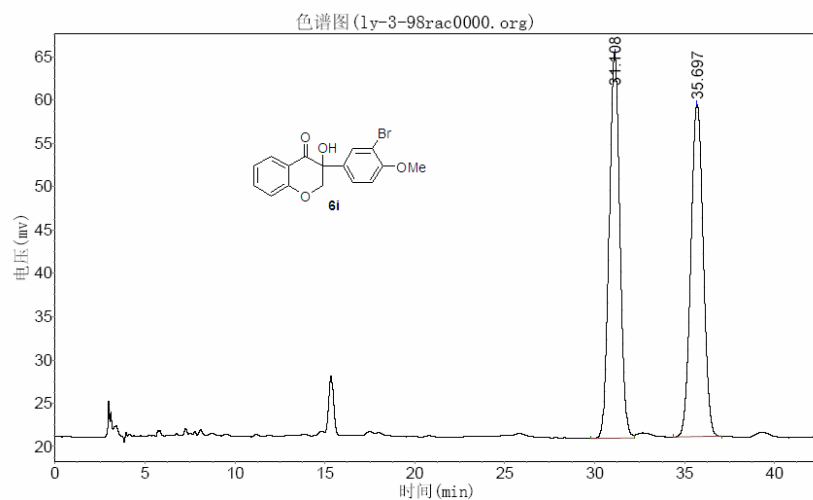

| No. | R. Time | PeakHeight | PeakArea    | PerCent  |
|-----|---------|------------|-------------|----------|
| 1   | 31.108  | 44420.879  | 1839343.875 | 50.1847  |
| 2   | 35.697  | 38339.938  | 1825807.750 | 49.8153  |
| 总计  |         | 82760.816  | 3665151.625 | 100.0000 |

实验时间: 2066-10-24, 10:20:45  
谱图文件:D:\date\ly\样品\ly-3-990000.org

实验者: ly  
报告时间: 2066-10-24, 10:22:19

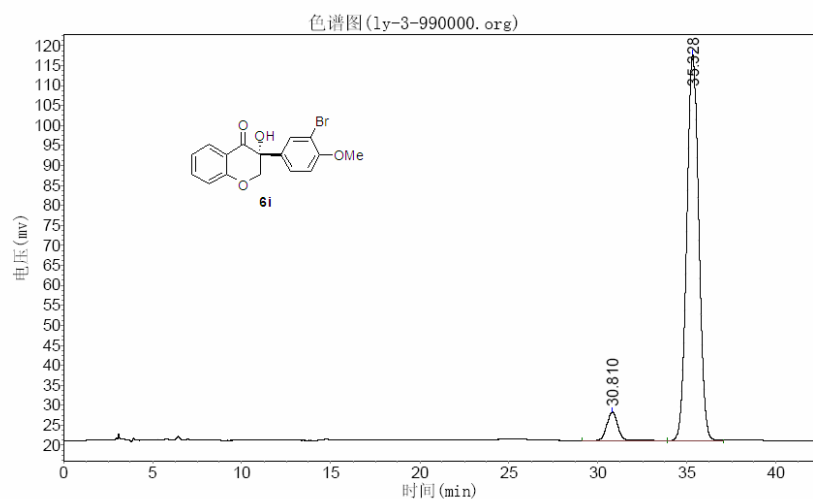

| No. | R. Time | PeakHeight | PeakArea    | PerCent  |
|-----|---------|------------|-------------|----------|
| 1   | 30.810  | 7224.182   | 315866.063  | 6.5184   |
| 2   | 35.328  | 96721.672  | 4529857.500 | 93.4816  |
| 总计  |         | 103945.854 | 4845723.563 | 100.0000 |

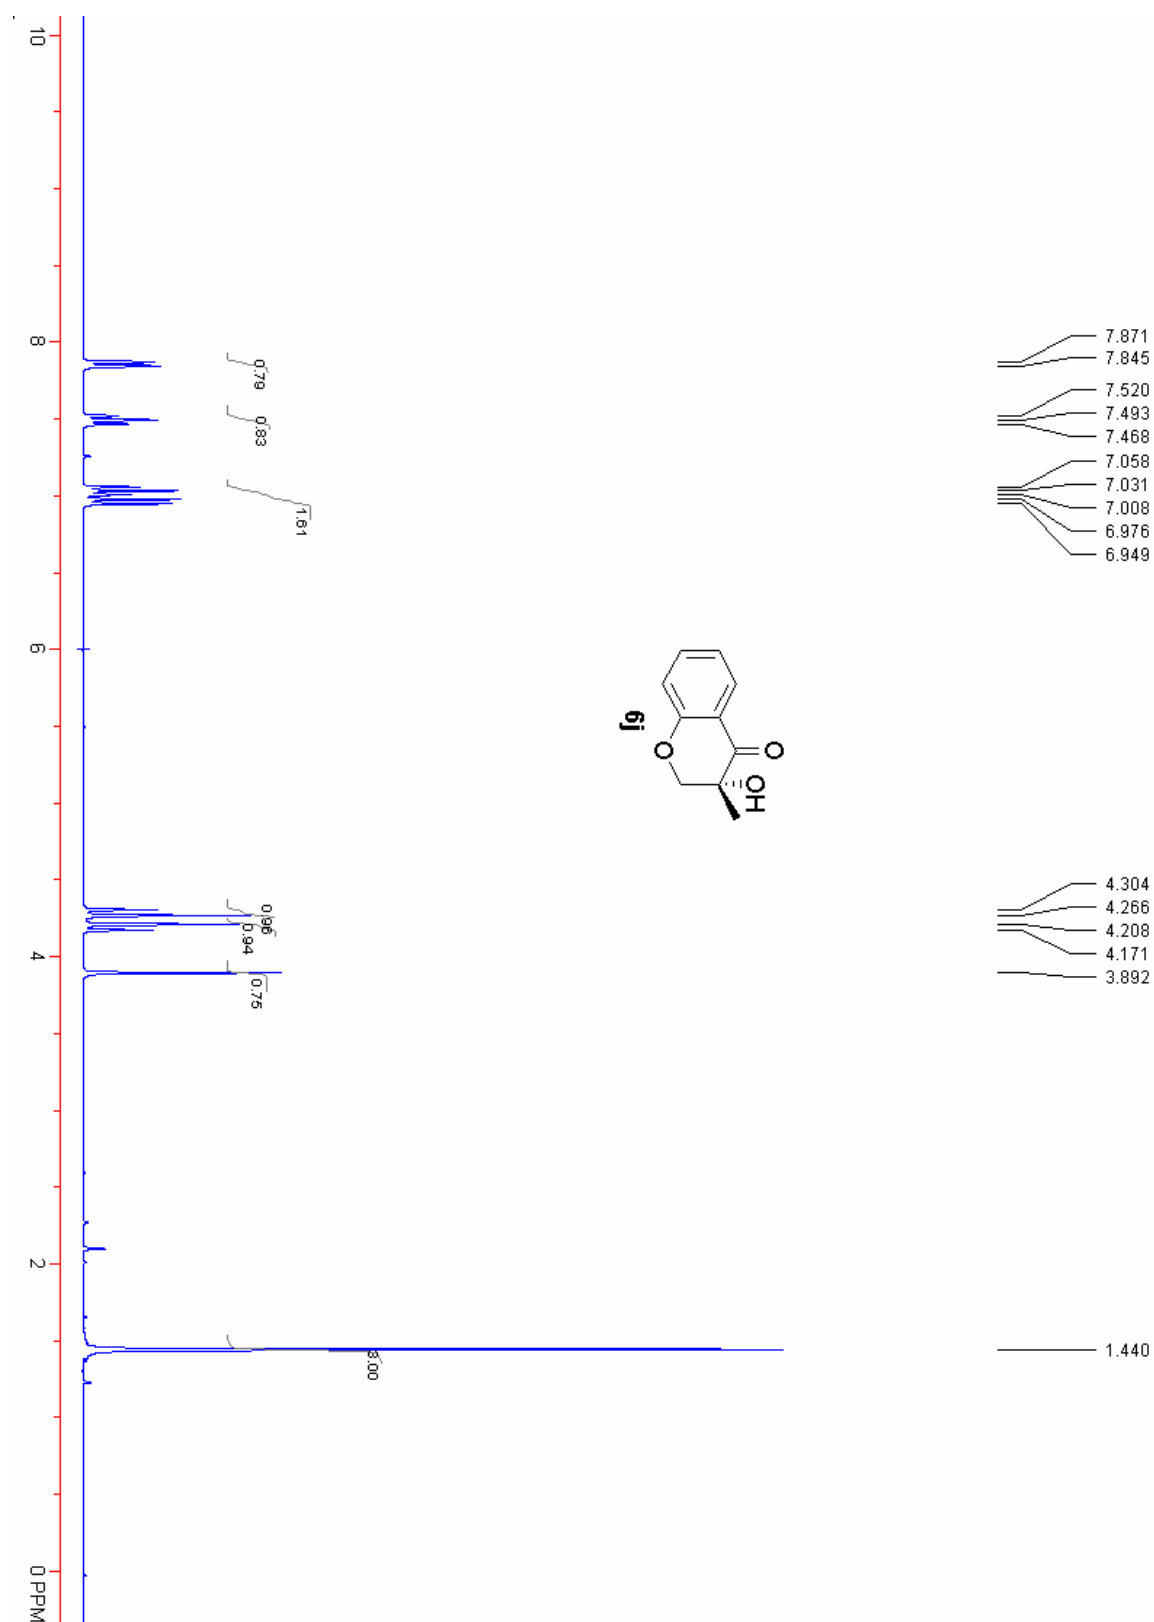

实验时间: 2066-11-27, 17:10:02  
谱图文件: D:\date\ly\样品\ly-4-36rac0000.org

实验者: liyi  
报告时间: 2066-12-14, 8:54:47

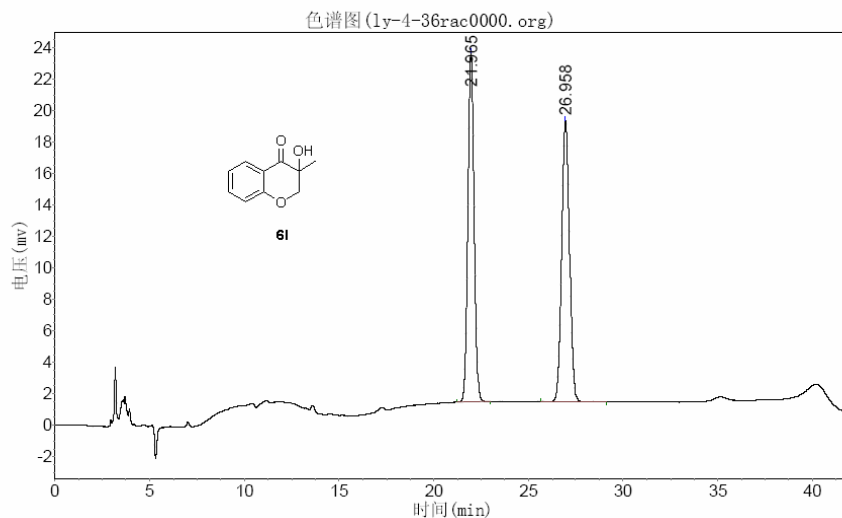

| No. | R. Time | PeakHeight | PeakArea    | PerCent  |
|-----|---------|------------|-------------|----------|
| 1   | 21.965  | 22188.908  | 514523.844  | 49.7751  |
| 2   | 26.958  | 17880.012  | 519173.563  | 50.2249  |
| 总计  |         | 40068.920  | 1033697.406 | 100.0000 |

实验时间: 2066-11-27, 18:05:50  
谱图文件: D:\date\ly\样品\ly-4-370000.org

实验者: liyi  
报告时间: 2066-11-27, 18:10:36

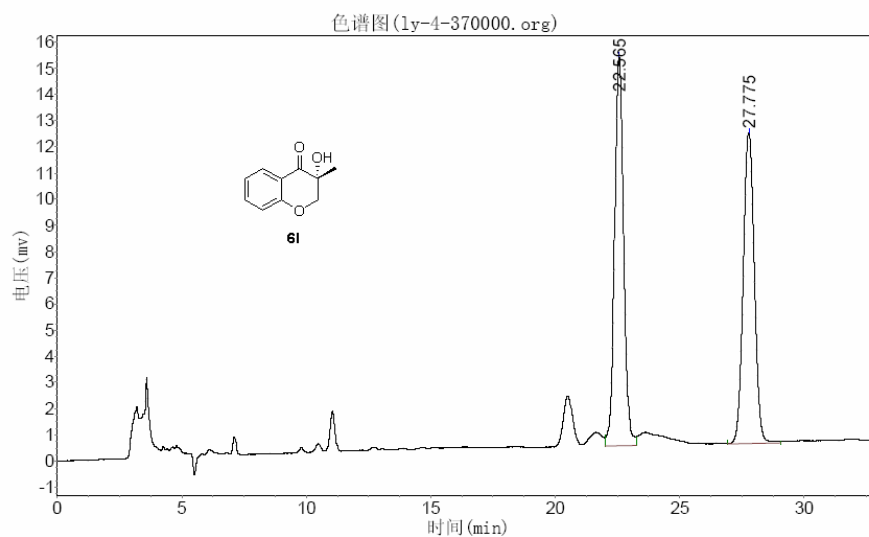

| No. | R. Time | PeakHeight | PeakArea   | PerCent  |
|-----|---------|------------|------------|----------|
| 1   | 22.565  | 14862.074  | 379236.469 | 51.1234  |
| 2   | 27.775  | 11859.028  | 362570.000 | 48.8766  |
| 总计  |         | 26721.103  | 741806.469 | 100.0000 |

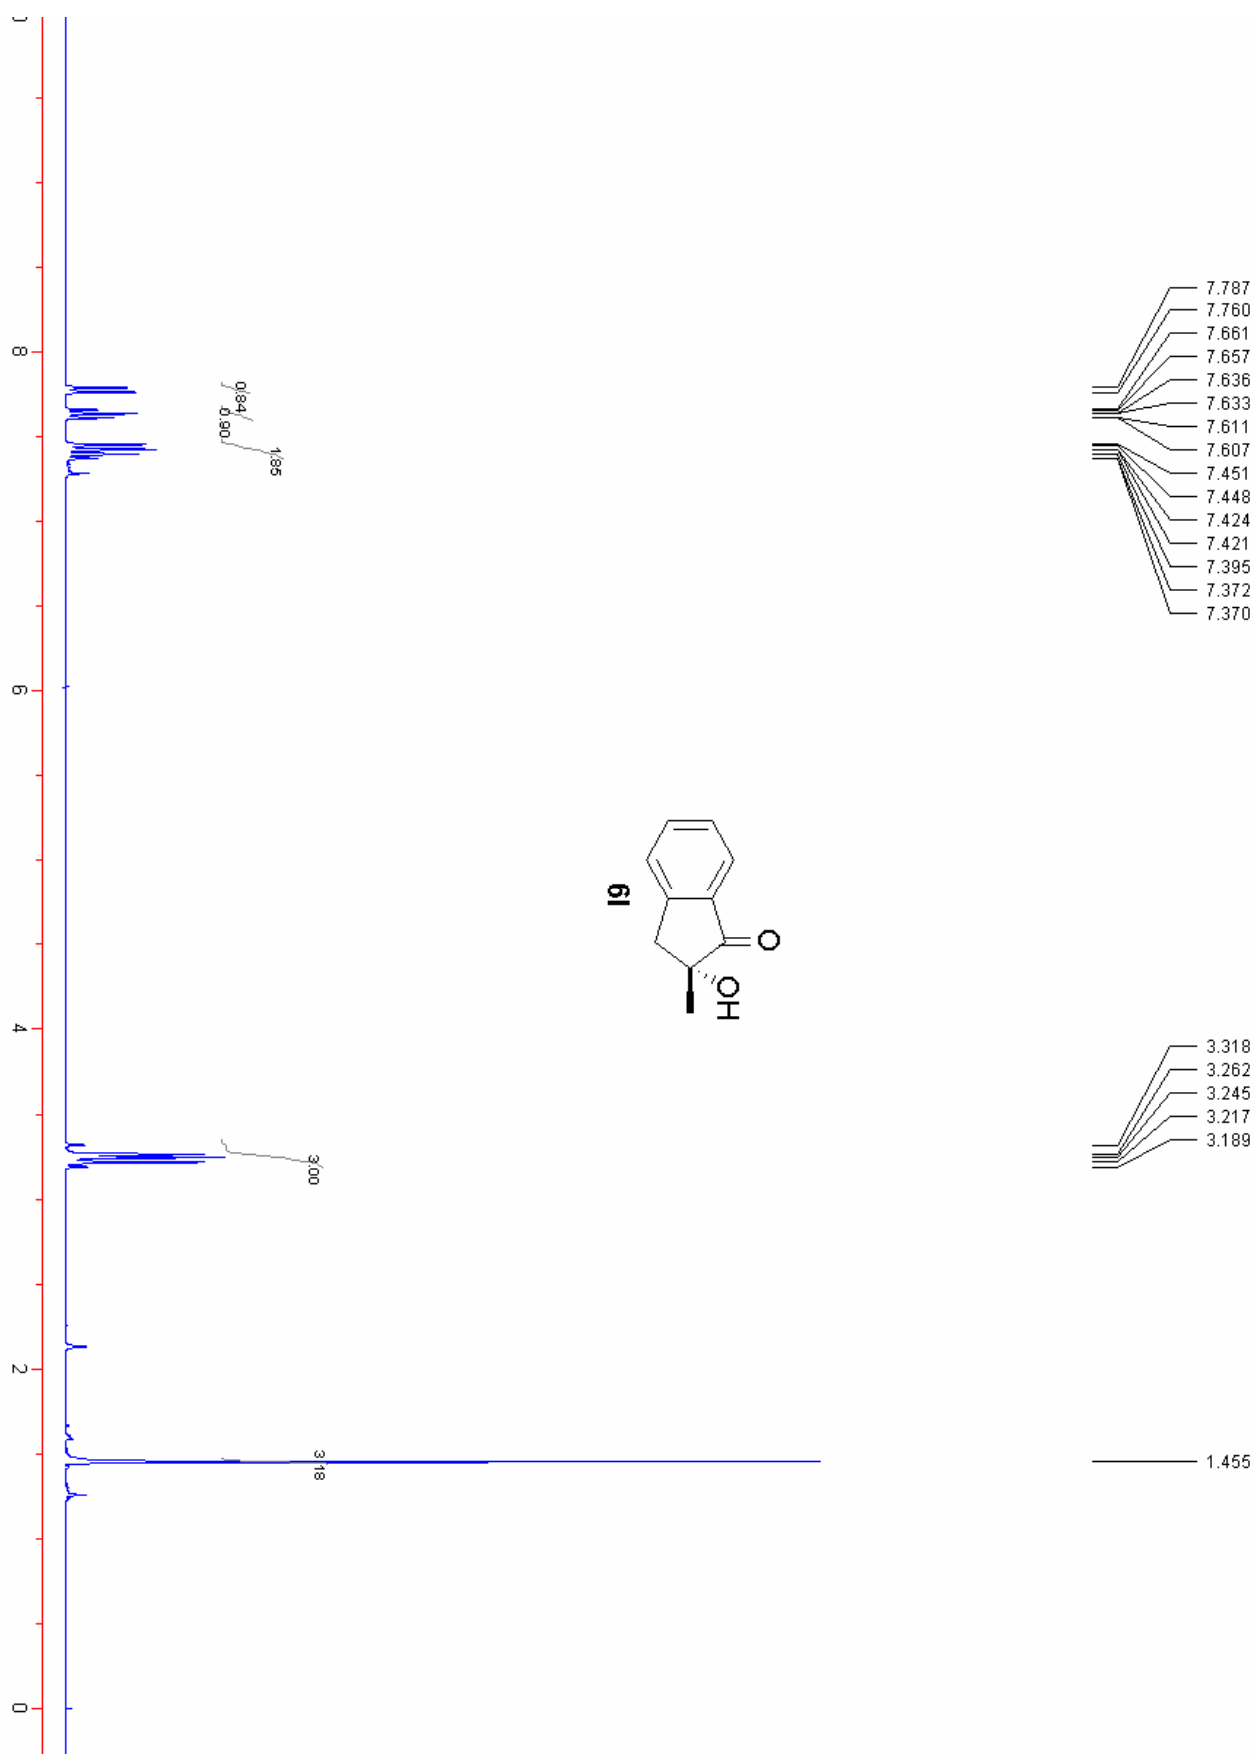

样品名称: 分析谱图

分析日期: 2007-10-25

色谱柱:

流速:

样品文件名: ly-3-95. che

分析时间: 09:17

流动相:

检测波长:

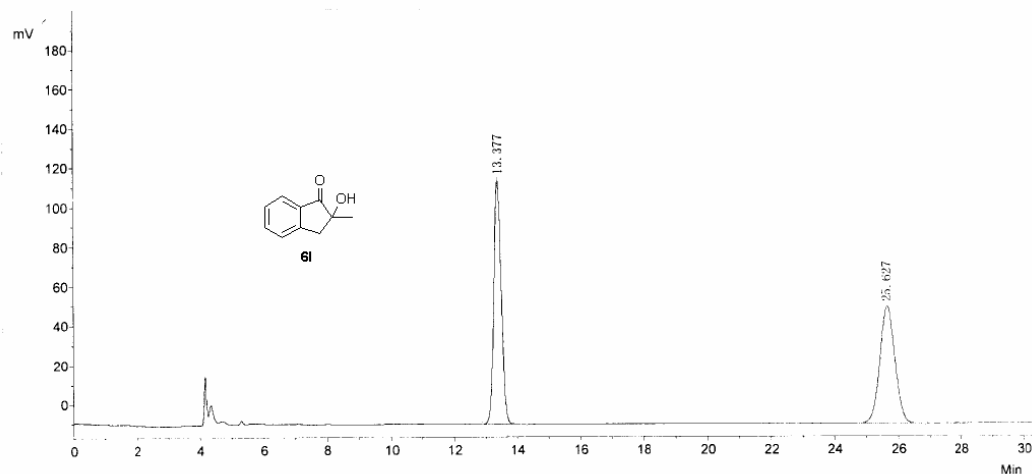

样品名称: 分析谱图

分析日期: 2007-10-25

色谱柱:

流速:

样品文件名: ly-3-96. che

分析时间: 09:49

流动相:

检测波长:

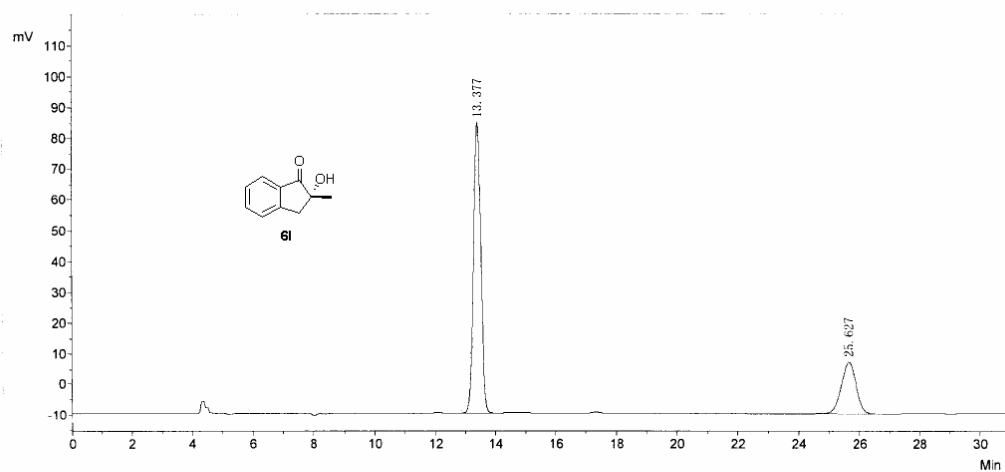

**Table 1.** Crystal data and structure refinement for Triazolium Salt **1c**.

|                                   |                                                                                                                          |
|-----------------------------------|--------------------------------------------------------------------------------------------------------------------------|
| Identification code               | cd27300                                                                                                                  |
| Empirical formula                 | C <sub>22</sub> H <sub>30</sub> B F <sub>4</sub> N <sub>3</sub> O                                                        |
| Formula weight                    | 439.30                                                                                                                   |
| Temperature                       | 293(2) K                                                                                                                 |
| Wavelength                        | 0.71073 Å                                                                                                                |
| Crystal system, space group       | Monoclinic, P2(1)                                                                                                        |
| Unit cell dimensions              | a = 12.0906(18) Å    alpha = 90 deg.<br>b = 7.9338(12) Å    beta = 116.257(2) deg.<br>c = 13.540(2) Å    gamma = 90 deg. |
| Volume                            | 1164.8(3) Å <sup>3</sup>                                                                                                 |
| Z, Calculated density             | 2, 1.252 Mg/m <sup>3</sup>                                                                                               |
| Absorption coefficient            | 0.099 mm <sup>-1</sup>                                                                                                   |
| F(000)                            | 464                                                                                                                      |
| Crystal size                      | 0.497 x 0.205 x 0.181 mm                                                                                                 |
| Theta range for data collection   | 1.68 to 25.50 deg.                                                                                                       |
| Limiting indices                  | -11 ≤ h ≤ 14, -9 ≤ k ≤ 9, -16 ≤ l ≤ 16                                                                                   |
| Reflections collected / unique    | 6146 / 2332 [R(int) = 0.1465]                                                                                            |
| Completeness to theta = 25.50     | 99.5 %                                                                                                                   |
| Absorption correction             | Empirical                                                                                                                |
| Max. and min. transmission        | 1.00000 and 0.75123                                                                                                      |
| Refinement method                 | Full-matrix least-squares on F <sup>2</sup>                                                                              |
| Data / restraints / parameters    | 2332 / 1 / 287                                                                                                           |
| Goodness-of-fit on F <sup>2</sup> | 0.948                                                                                                                    |
| Final R indices [I > 2σ(I)]       | R <sub>1</sub> = 0.0626, wR <sub>2</sub> = 0.1517                                                                        |
| R indices (all data)              | R <sub>1</sub> = 0.0821, wR <sub>2</sub> = 0.1626                                                                        |
| Absolute structure parameter      | -10(10)                                                                                                                  |
| Extinction coefficient            | 0.010(4)                                                                                                                 |
| Largest diff. peak and hole       | 0.249 and -0.211 e.Å <sup>-3</sup>                                                                                       |

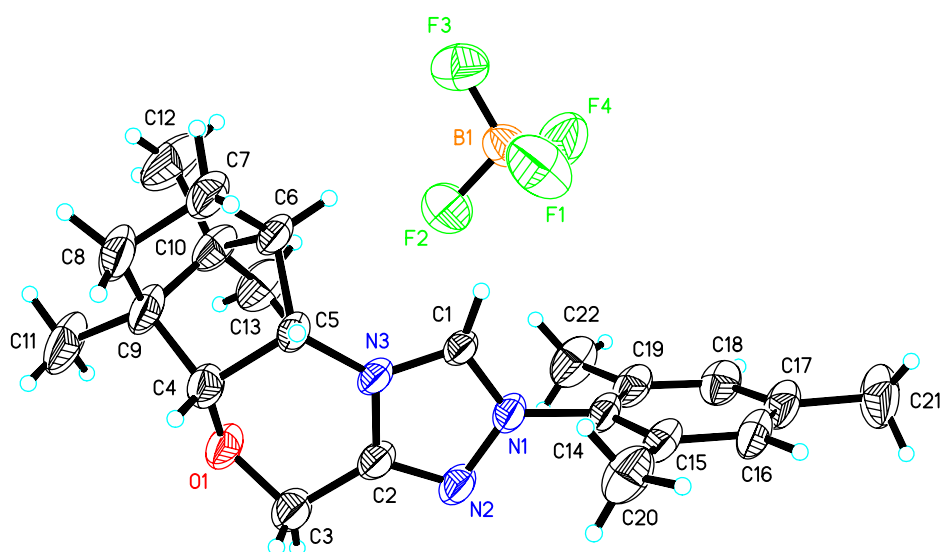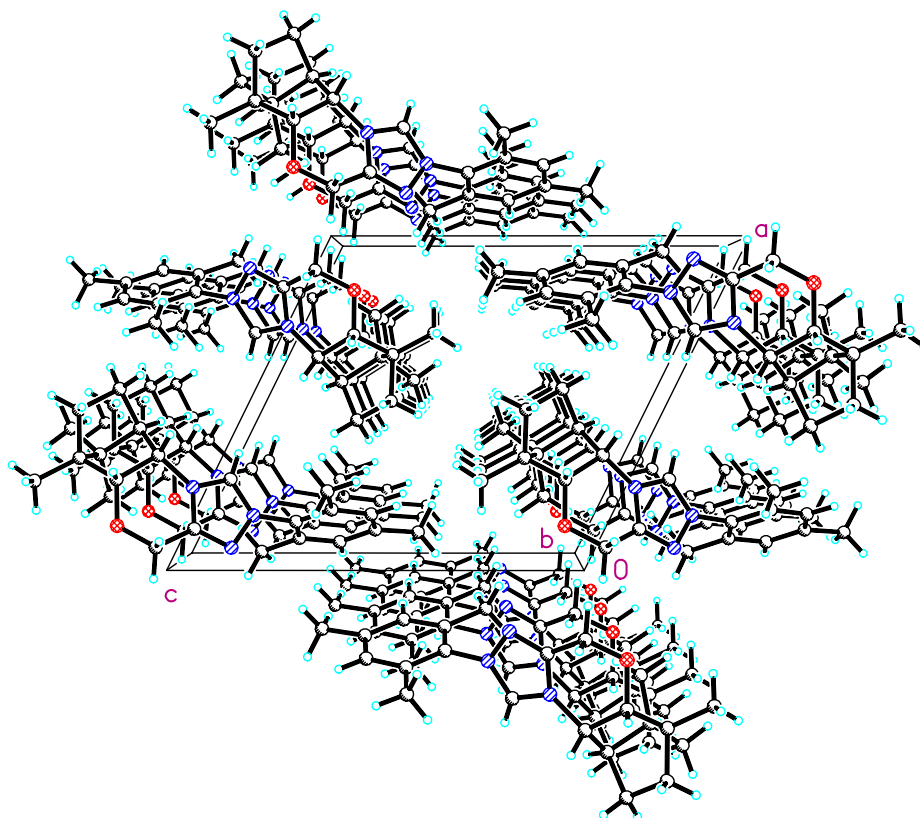

Supplement: b801004h.pdf [file b801004h.pdf]
